# Supplementary material for: Predicting blood–brain barrier permeability of molecules with a large language model and machine learning
Source: PubMed Central journal article supplement (PMC11233737; doi:10.1038/s41598-024-66897-y), 2024-07-09
Supplement: 41598_2024_66897_MOESM1_ESM.pdf [file 41598_2024_66897_MOESM1_ESM.pdf]

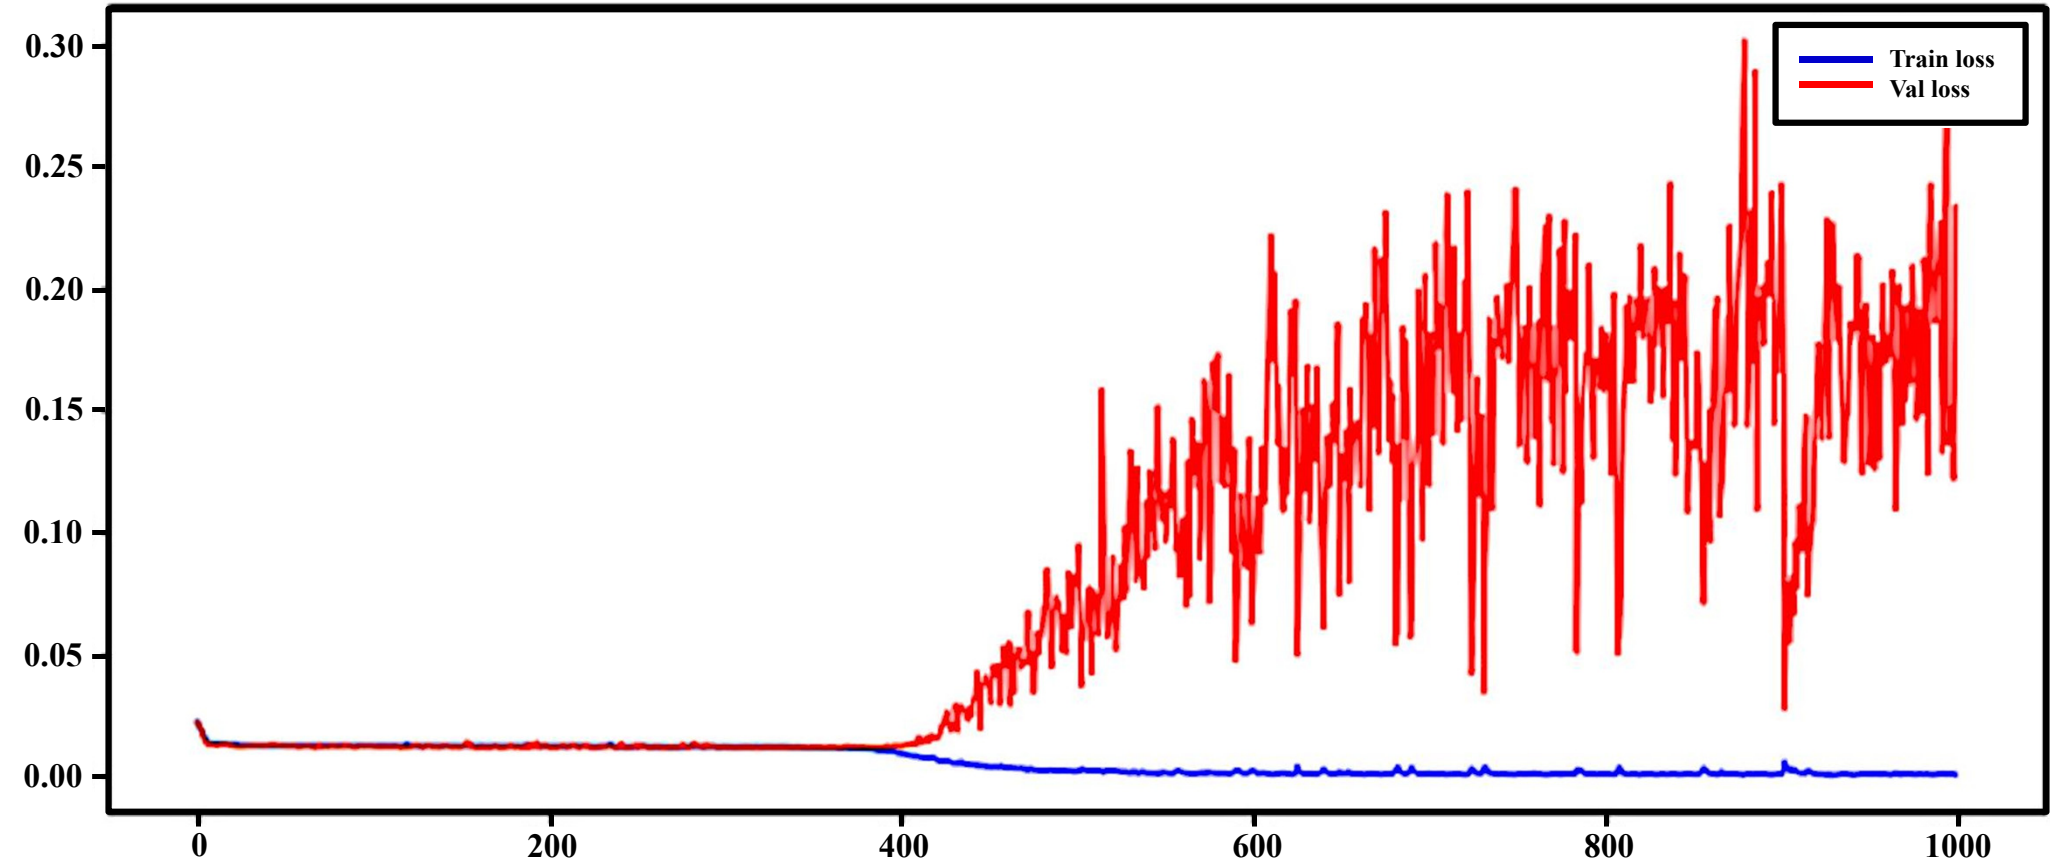

**Supplementary Figure S1: Training and validation loss curves.**

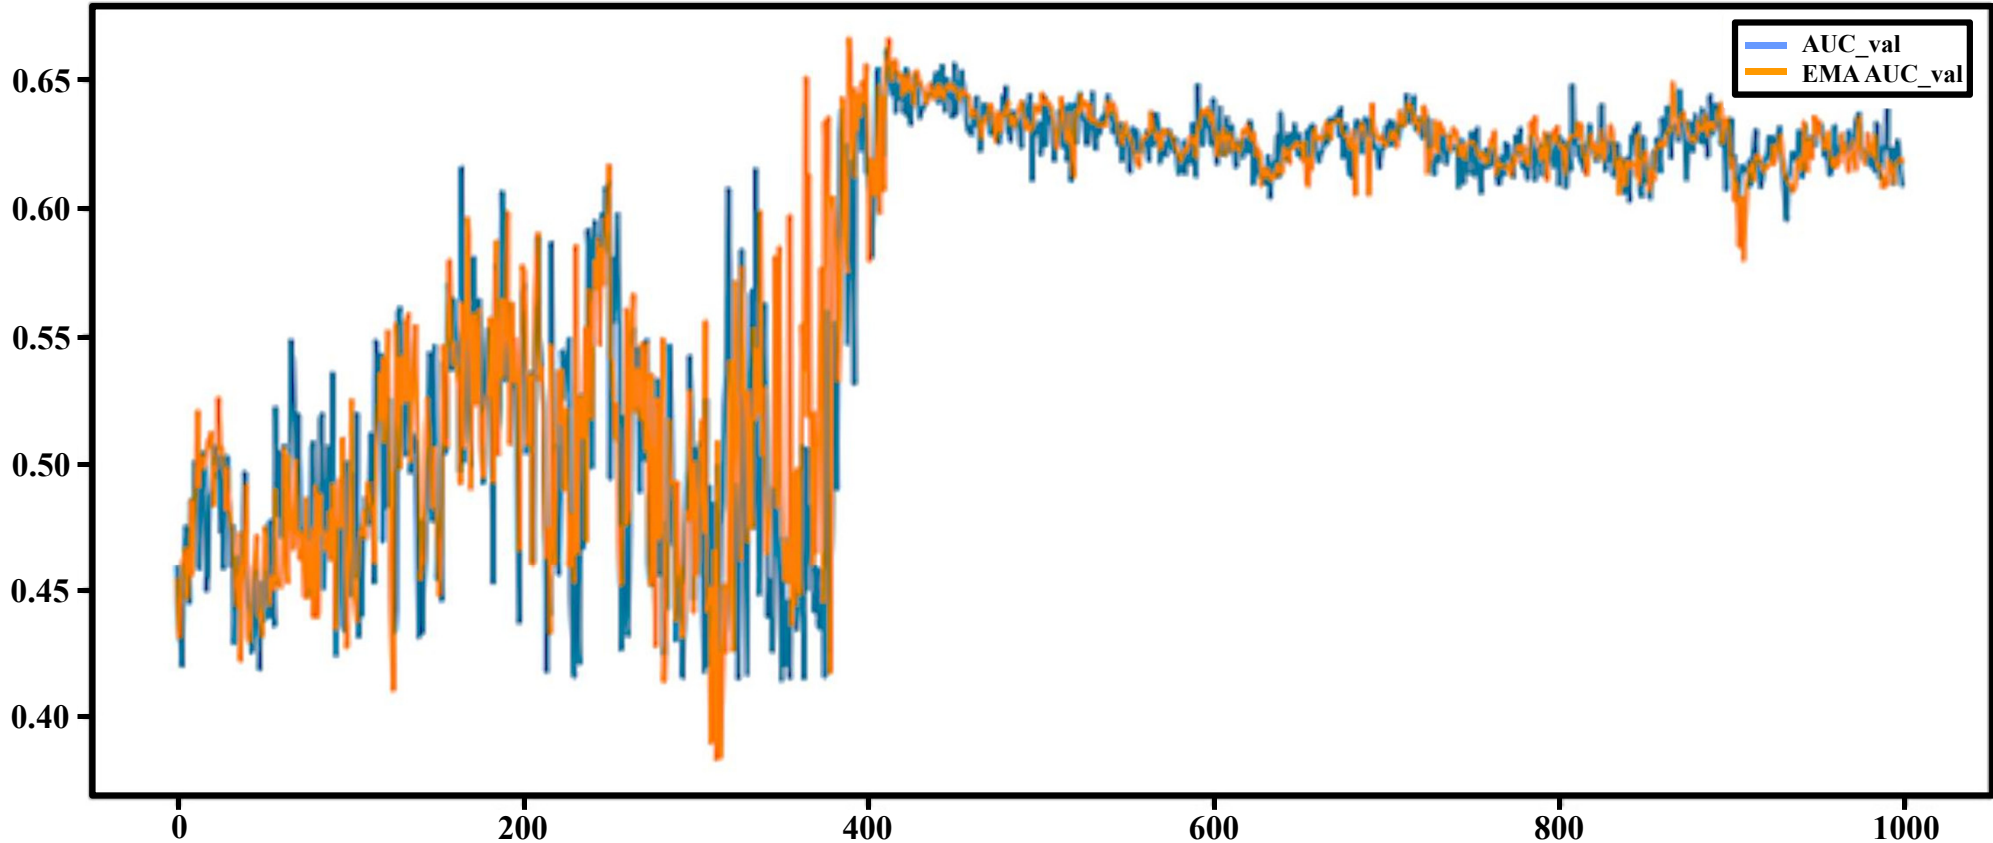

**Supplementary Figure S2: The validation area under curve (AUC) during training with and without the exponential moving average (EMA).**

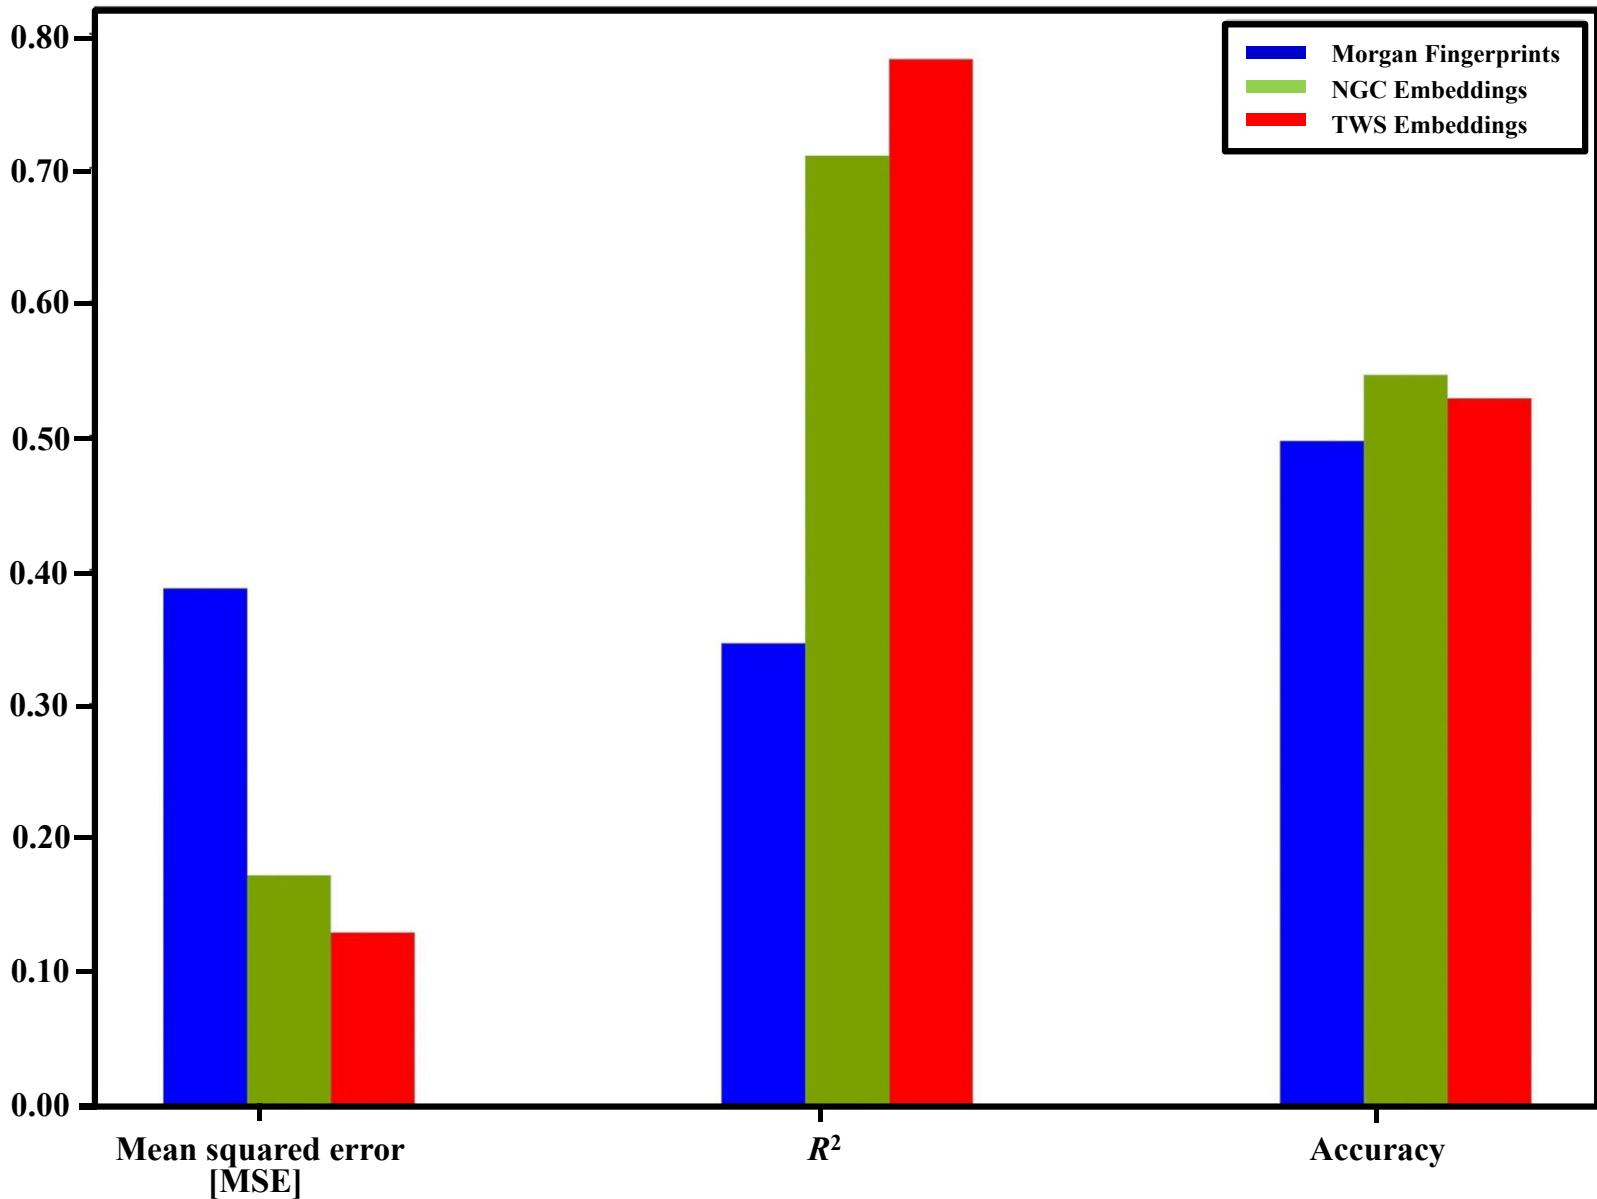

**Supplementary Figure S3: Mean square error (MSE),  $R^2$  and accuracy of performing regression with LogBB and accuracy of the conversion from LogBB to BBB+ and BBB-.**

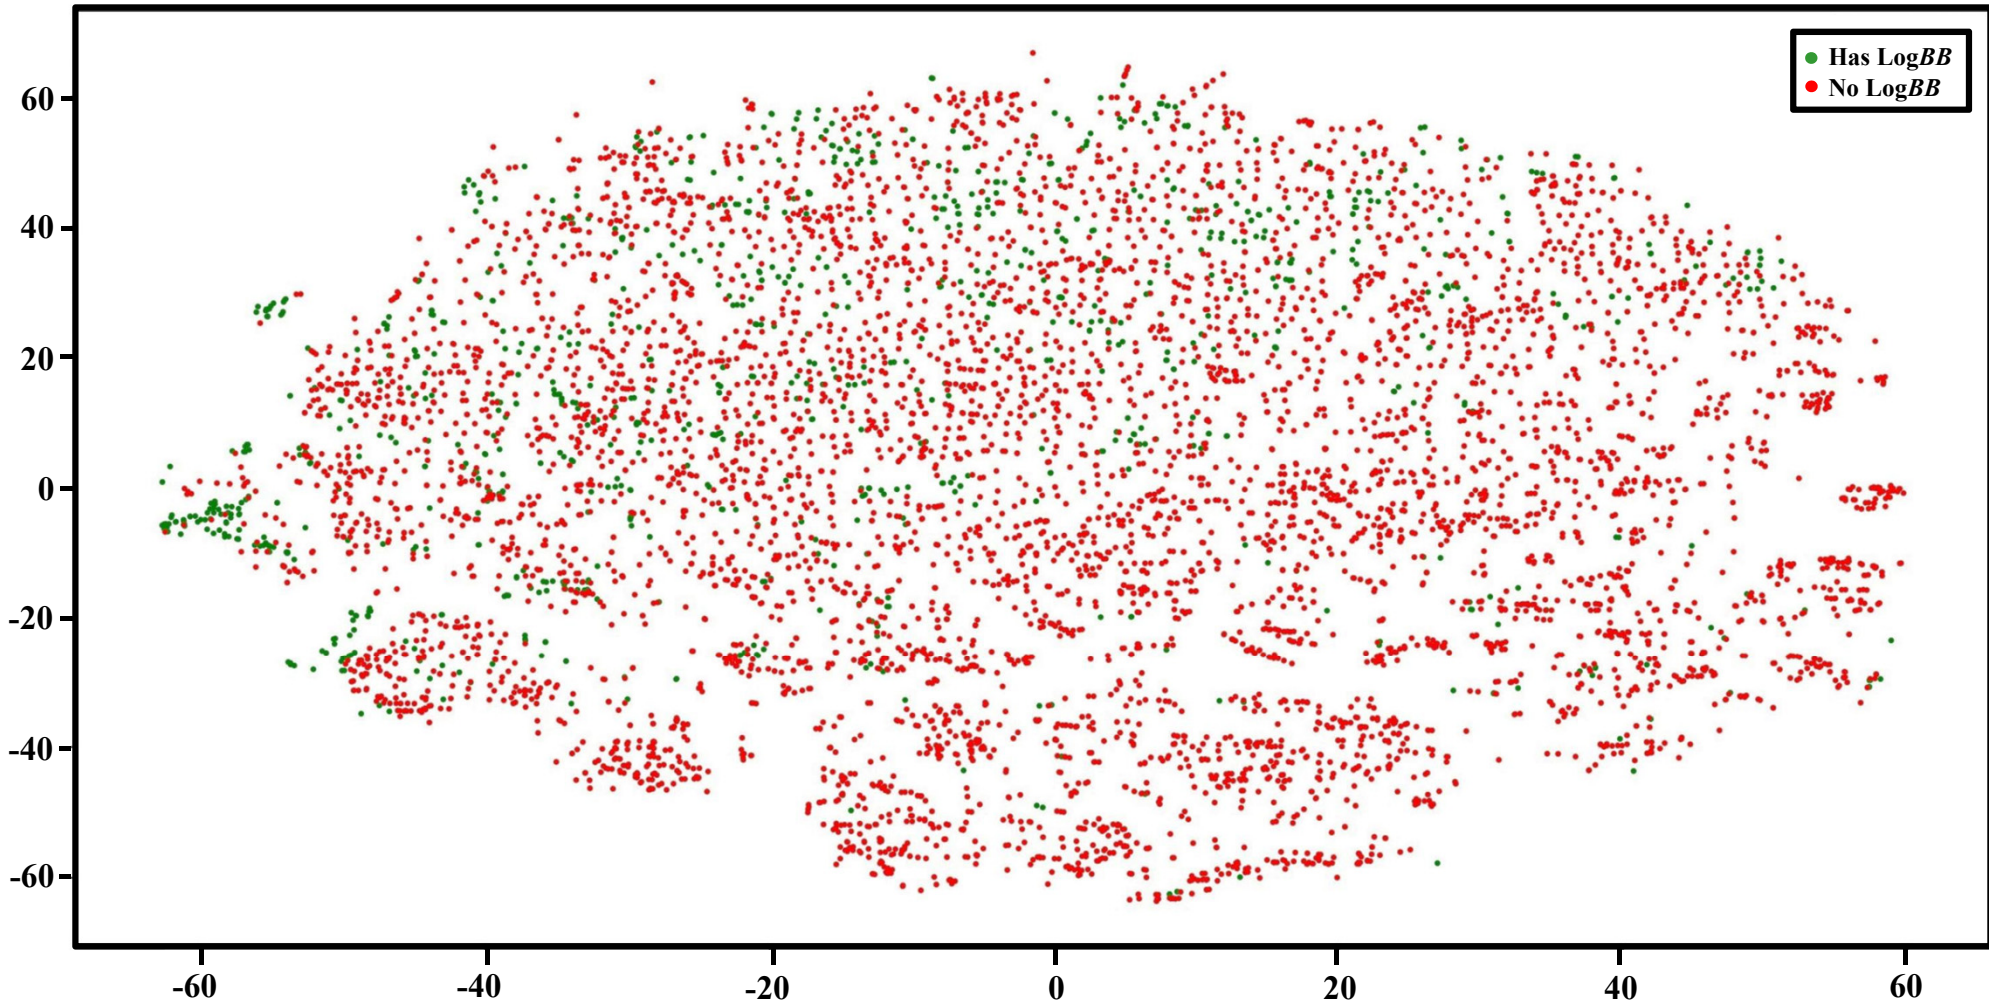

**Supplementary Figure S4: Data distribution of the datasets visualized using t-distributed stochastic neighbor embedding (t-SNE) .**

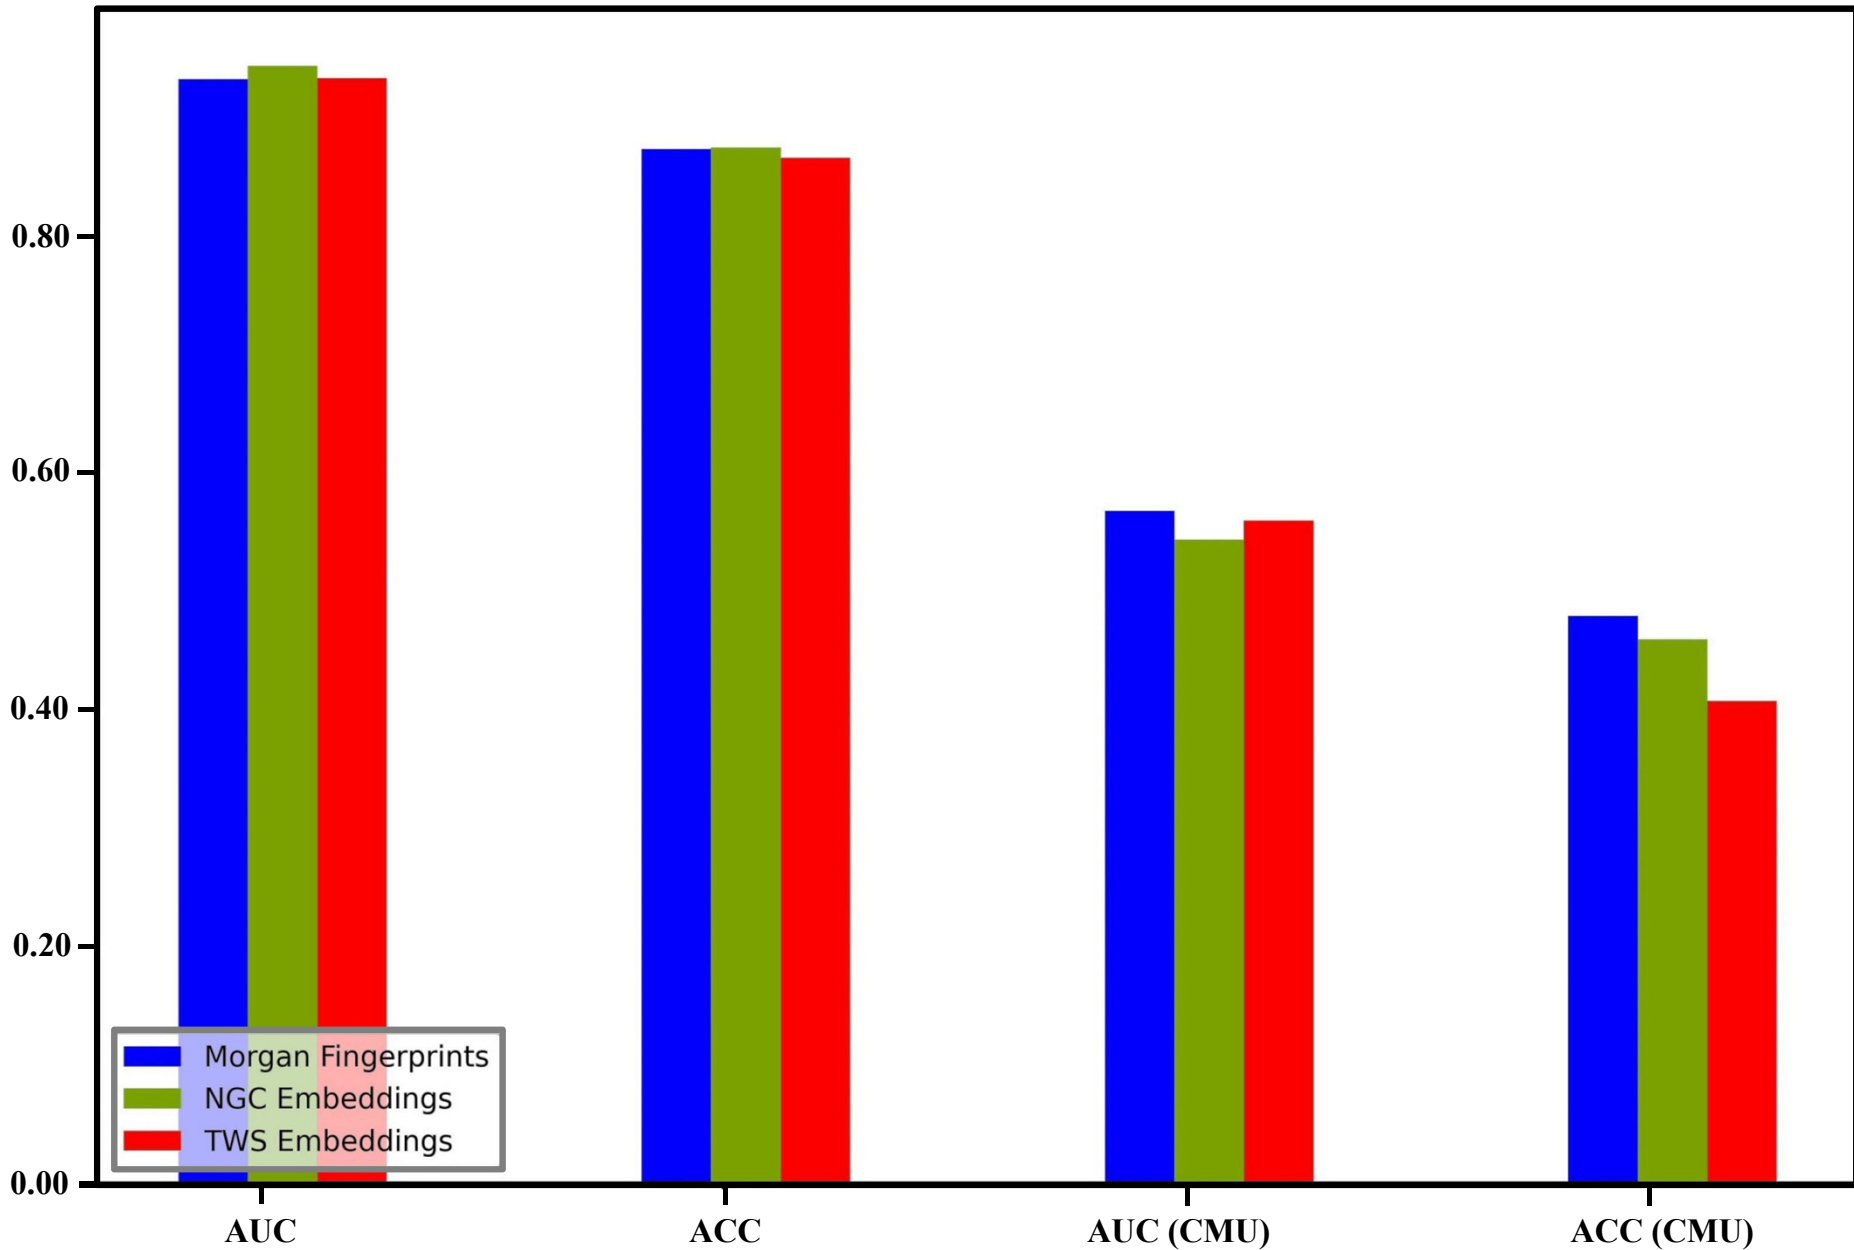

**Supplementary Figure S5: Classification AUC and accuracy of the test set from B3DB and classification AUC and accuracy of the CMUH dataset.**

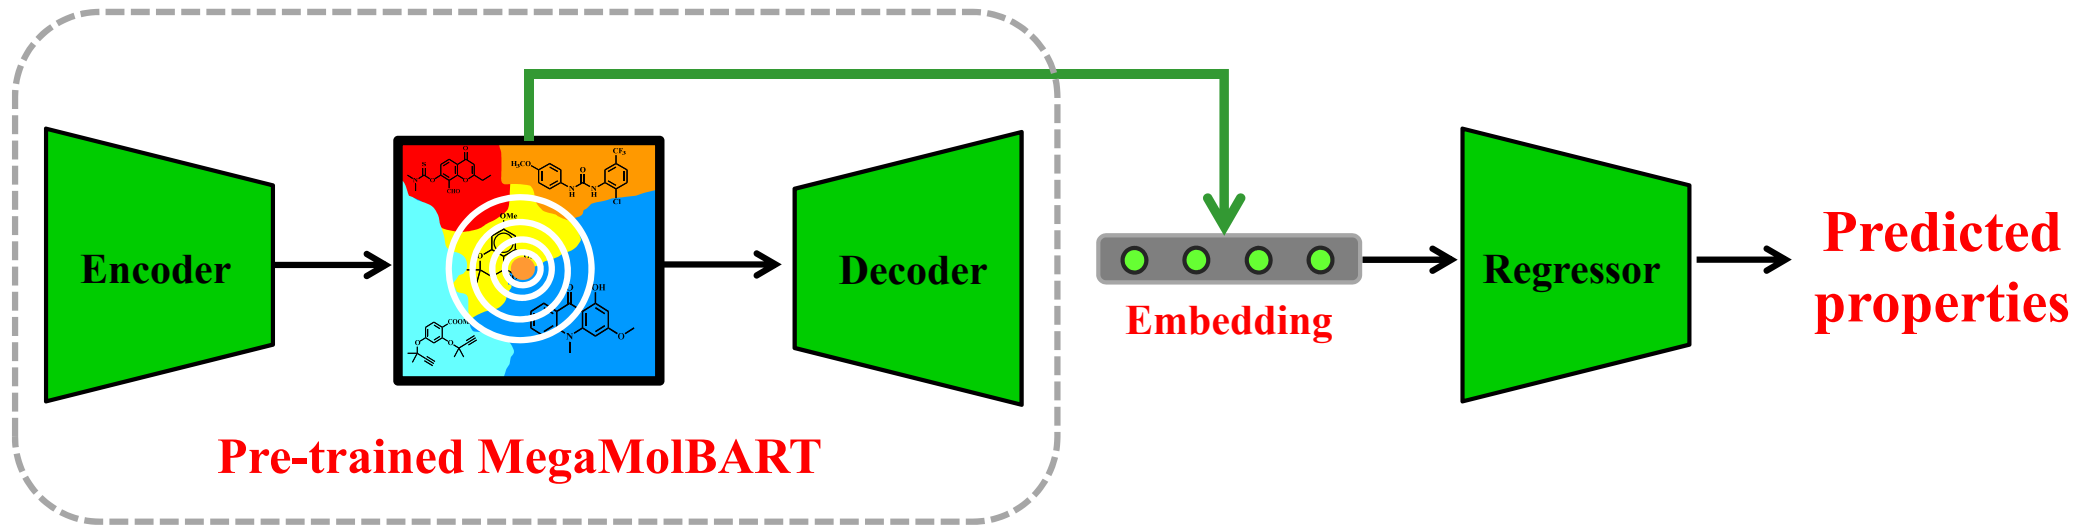

**Supplementary Figure S6: Predicted properties of pipeline using large language model (LLM).**

### Training Set

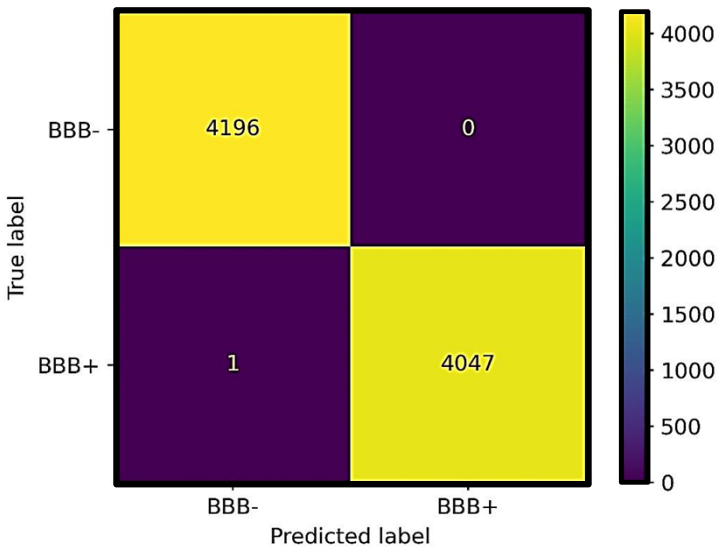

### Validation Set

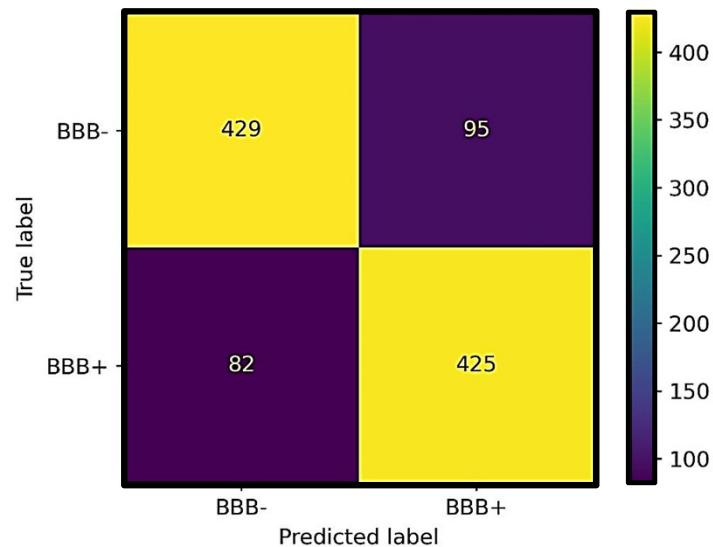

### Test Set

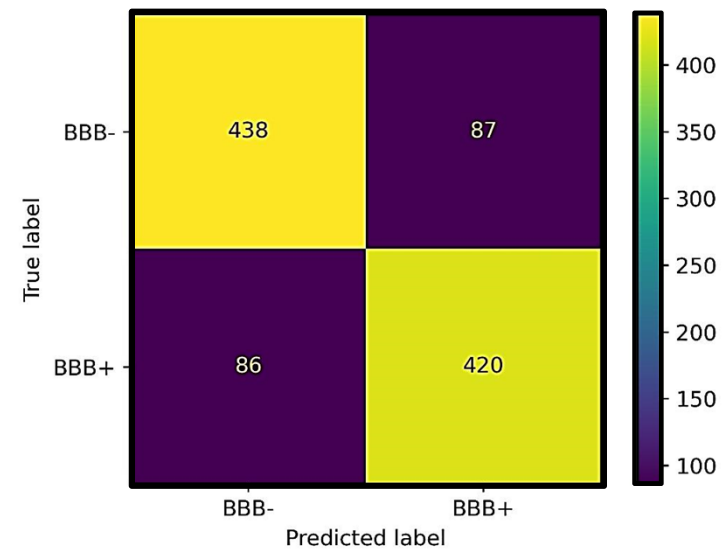

| Test Set  |       |
|-----------|-------|
| Metric    | Value |
| AUC       | 0.90  |
| Accuracy  | 0.83  |
| Precision | 0.83  |
| Recall    | 0.83  |
| F1-Score  | 0.83  |

**Supplementary Figure S7: The confusion matrices and evaluation metrics of the test set.**

## Compound treatment

1. TMZ (positive control)
2. Ferulic acid (negative control)
3. NPRL (26 Compounds)

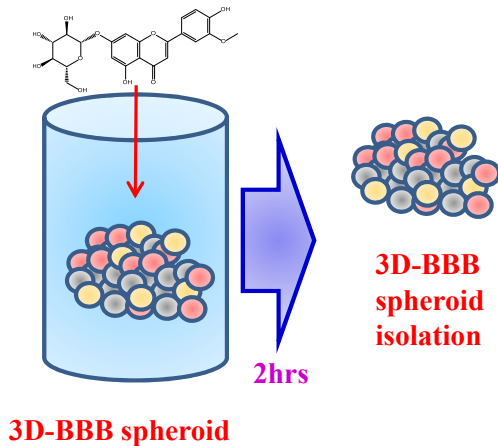

- Human brain microvascular endothelial cells
- Human brain vascular pericytes
- Human astrocytes

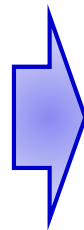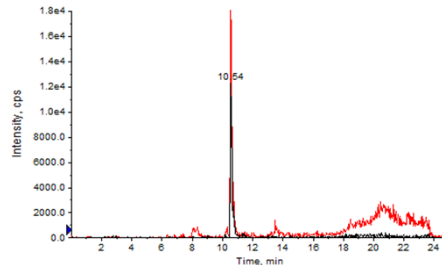

## **LC-MS/MS analysis**

**Supplementary Figure S8: A schematic diagram of *in vitro* experimental design.**



# Supplementary Figure S9. Human BBB spheroid cells were analyzed by LC-MS/MS.

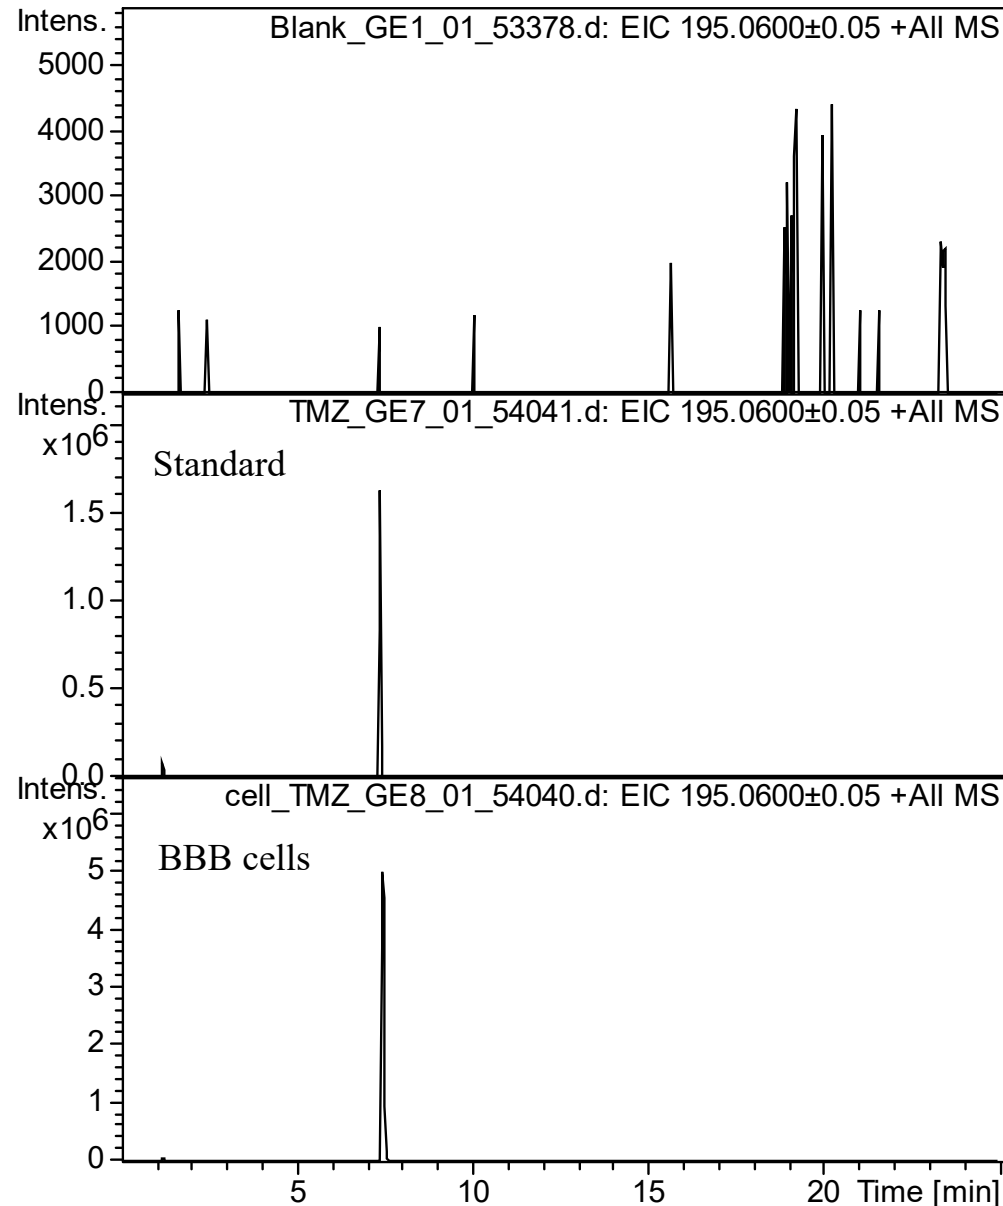

Temozolomide (TMZ; positive control)  
 $C_6H_6N_6O_2$  : 194.0546  
 $[M+H]^+$  : 195.0625

LC-MS/MS  
of 195.06  
at 7.4 min

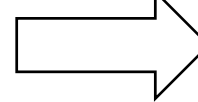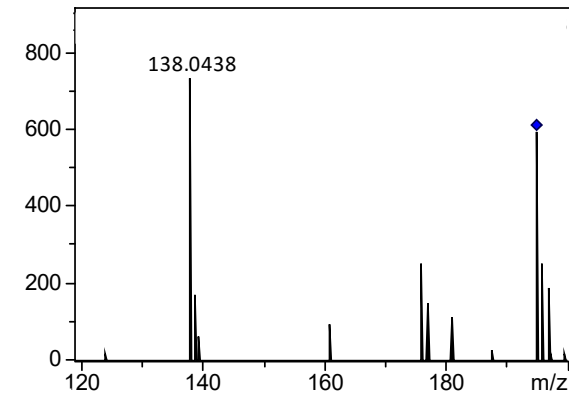

LC-MS/MS  
of 195.06  
at 7.4 min

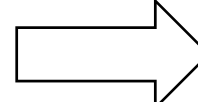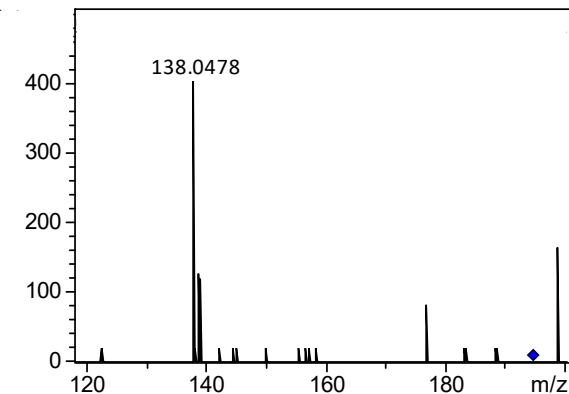

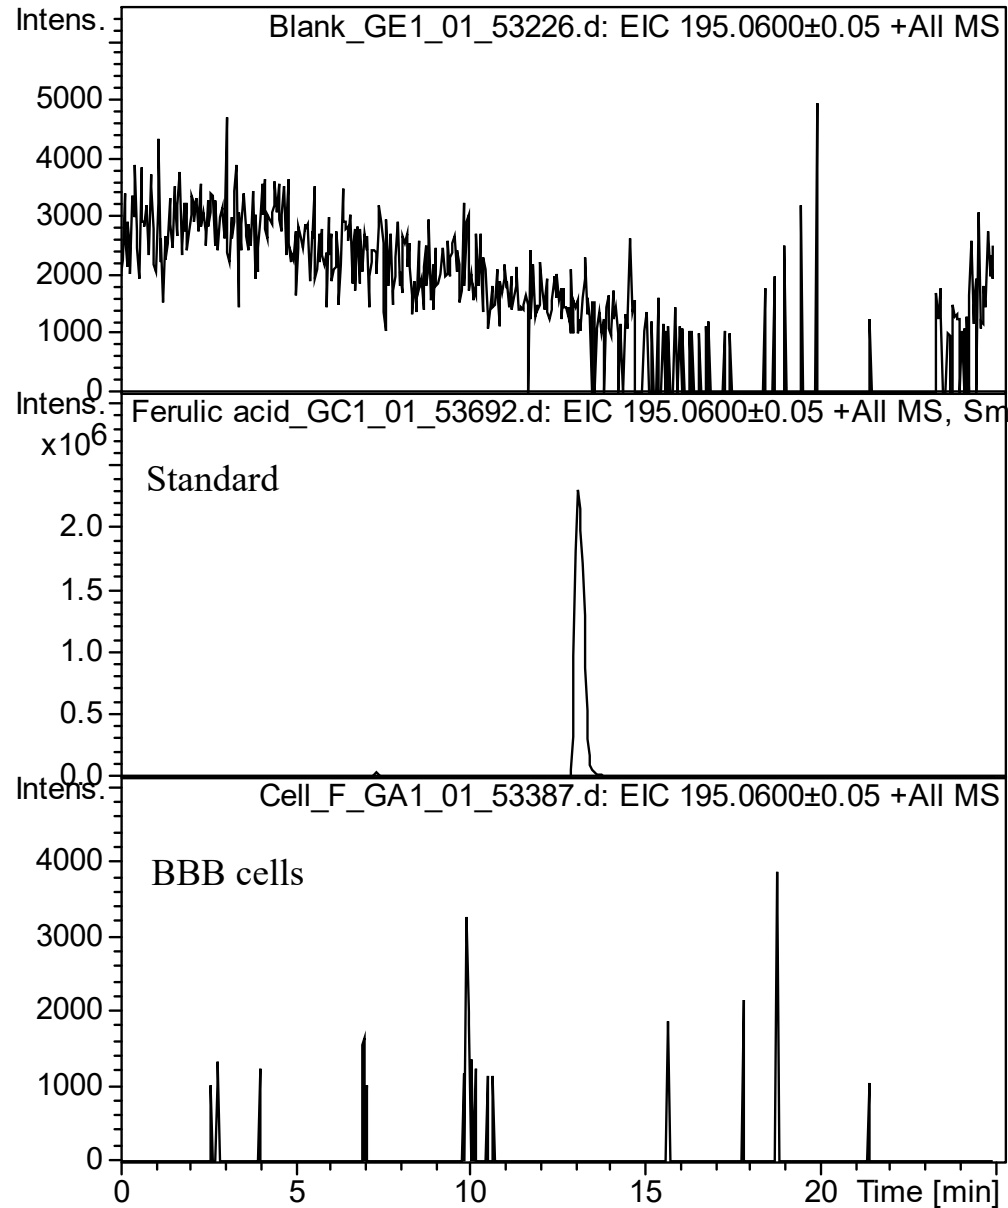

Ferulic acid (Negative control)

$C_{10}H_{10}O_4$ : 194.0573

$[M+H]^+$ : 195.0651

LC-MS/MS  
of 195.06  
at 13.0 min

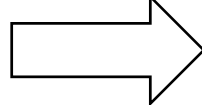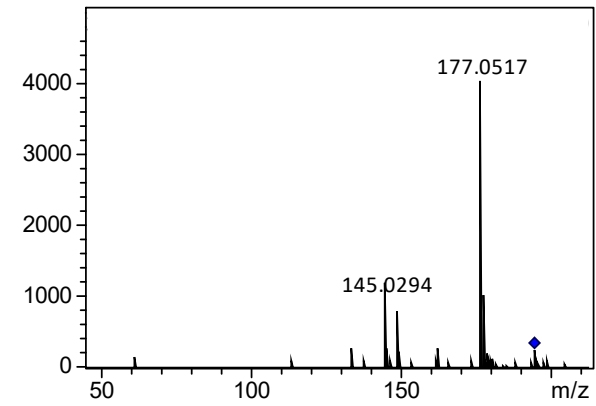

NPRL 309

$[M-H]^-$  : 221.15

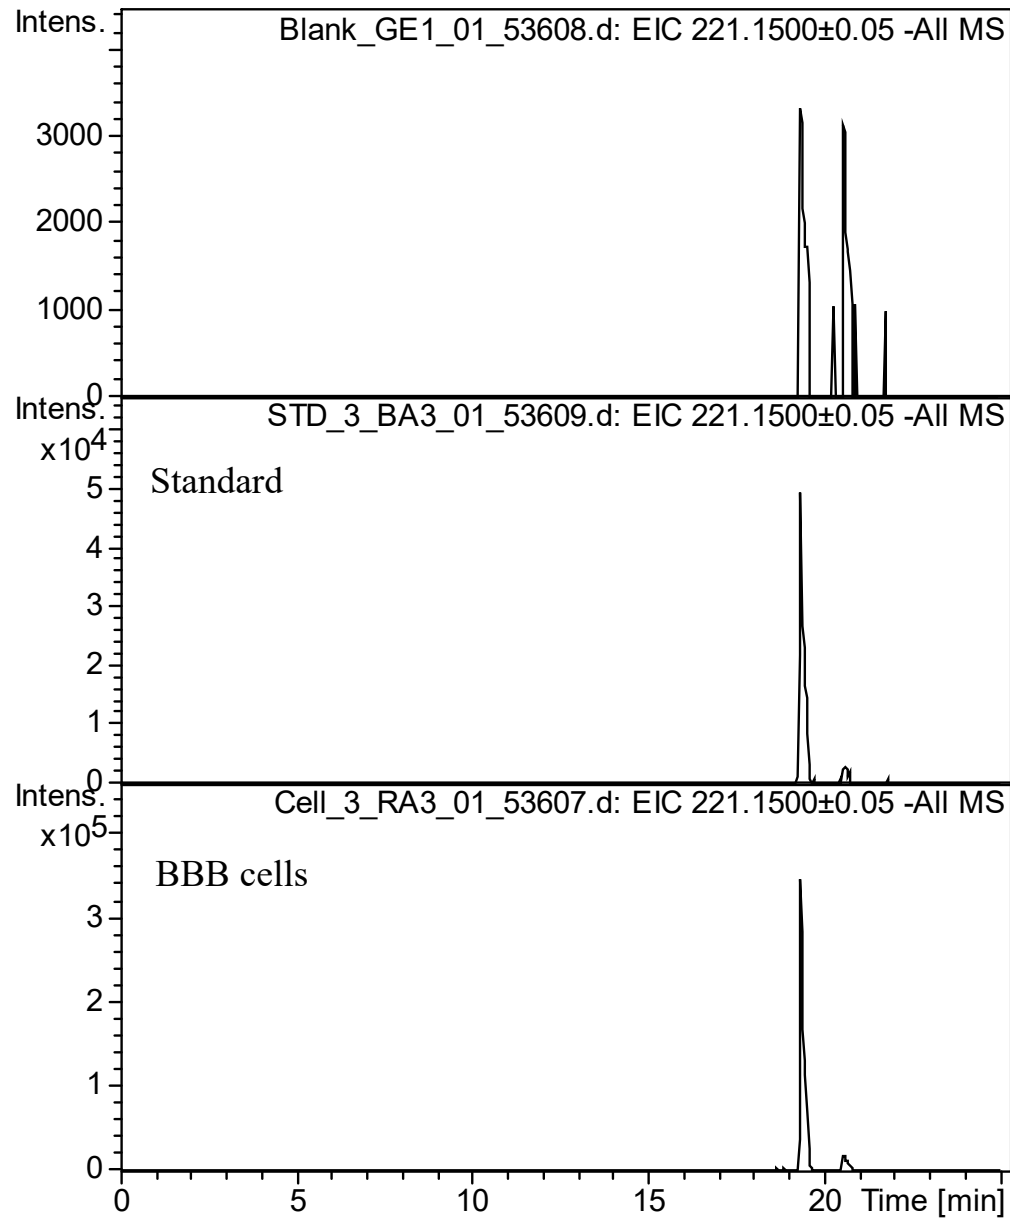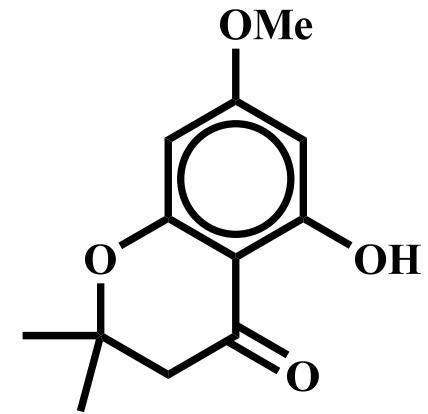

LC-MS/MS  
of 221.15  
at 19.4 min

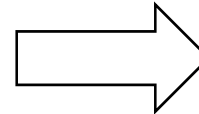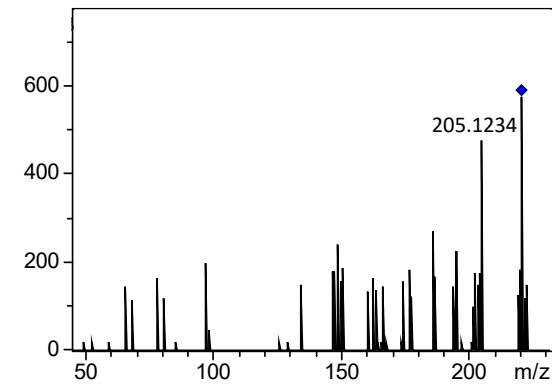

LC-MS/MS  
of 221.15  
at 19.4 min

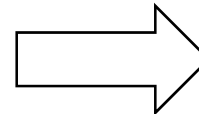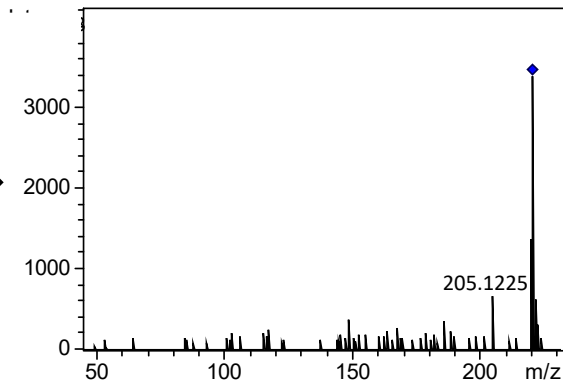

NPRL 358

[M+H]<sup>+</sup> : 345.05

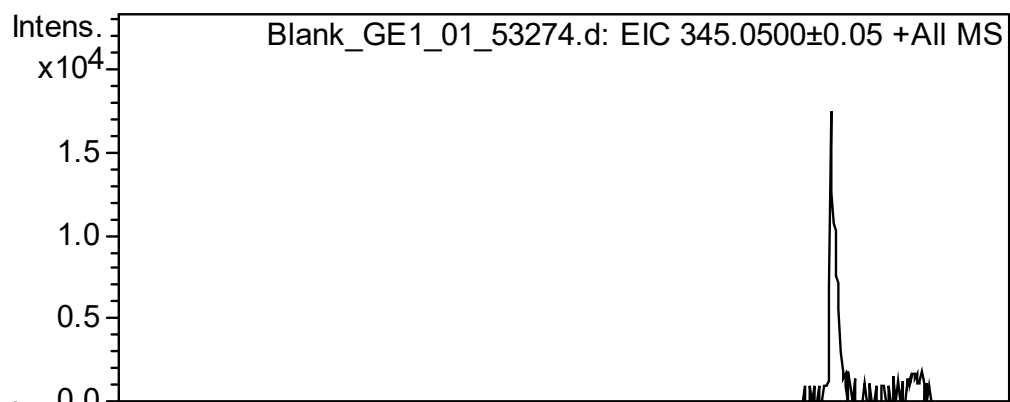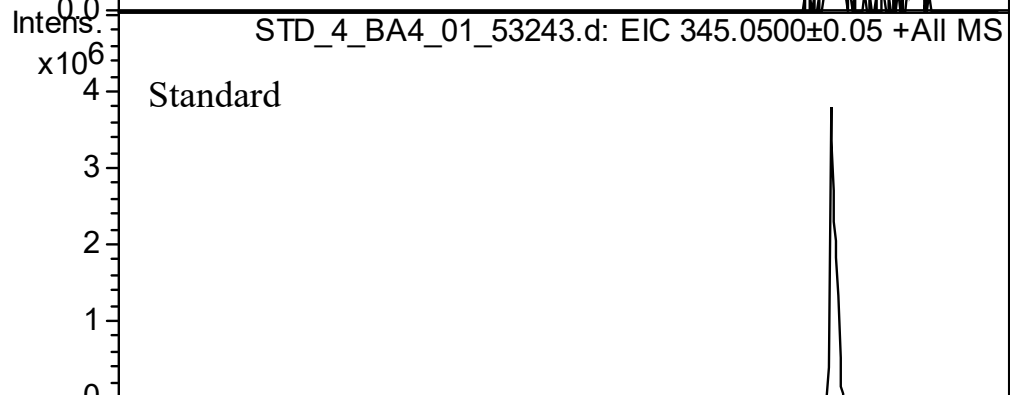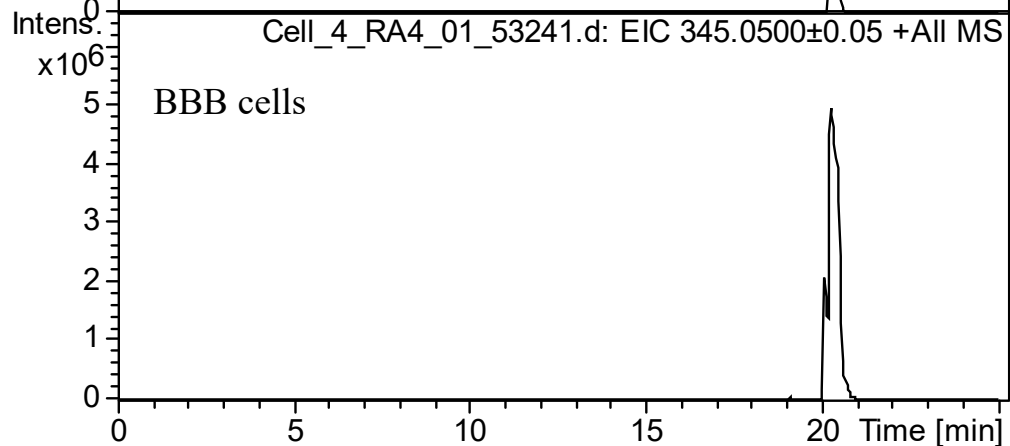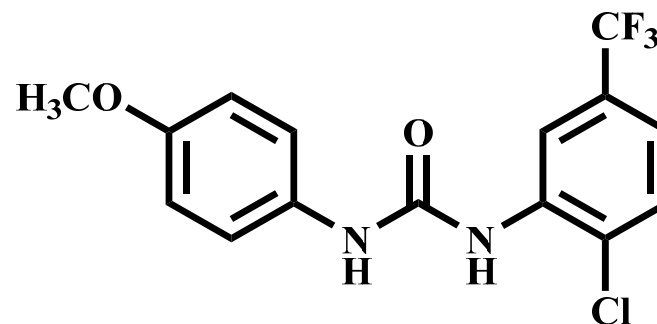

LC-MS/MS  
of 345.05  
at 20.3 min

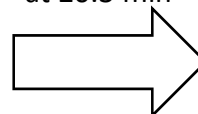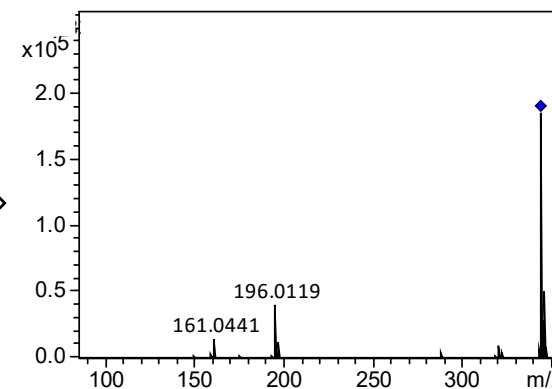

LC-MS/MS  
of 345.05  
at 20.3 min

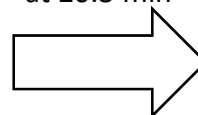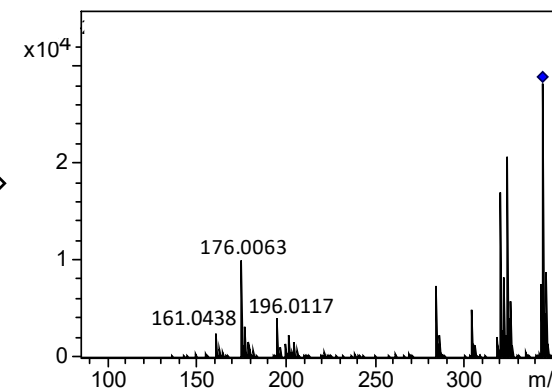

NPRL 588

$[M+H]^+ : 234.07$

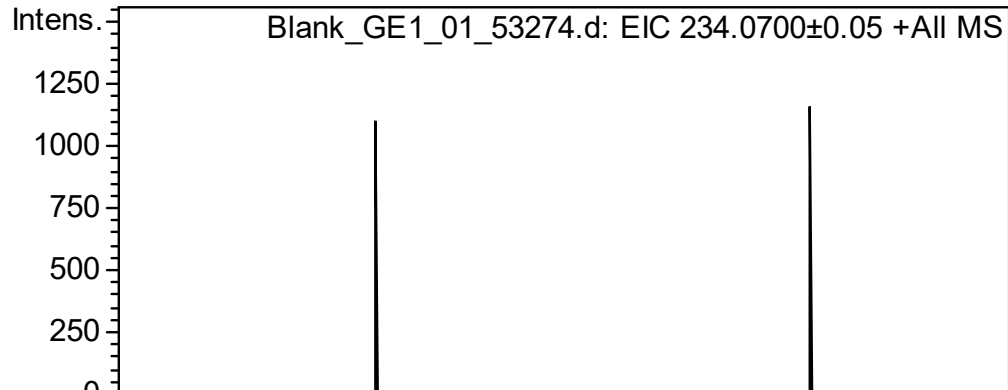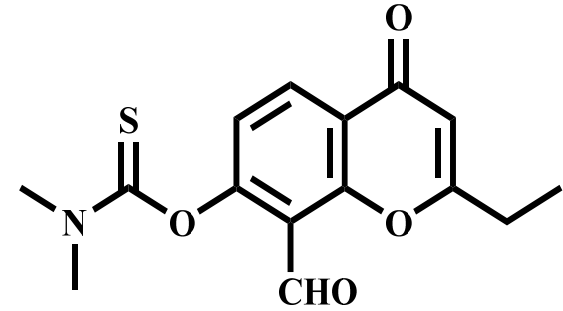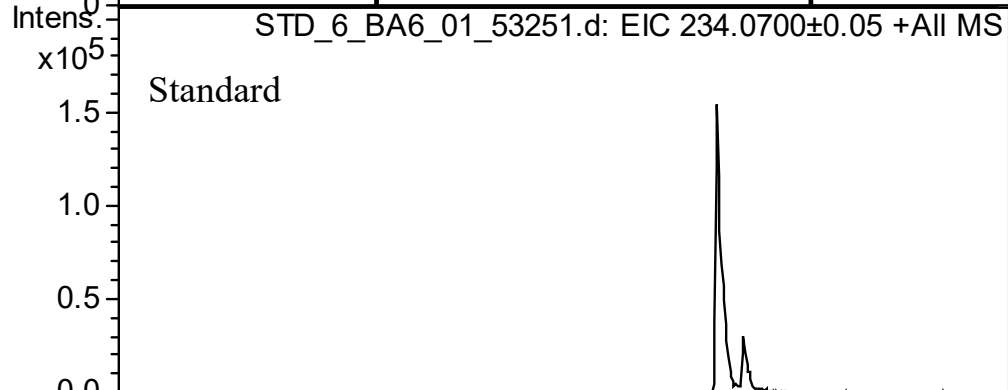

LC-MS/MS of 234.07 at 17.0 min

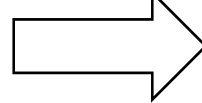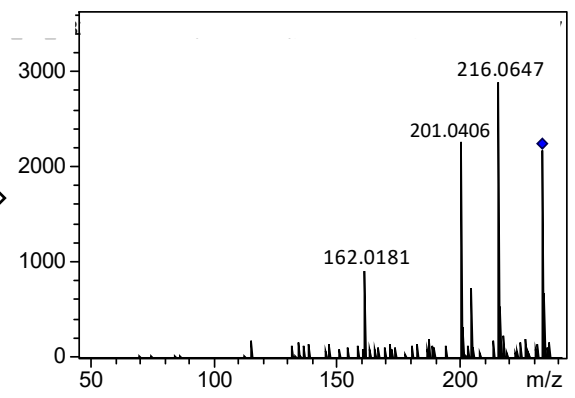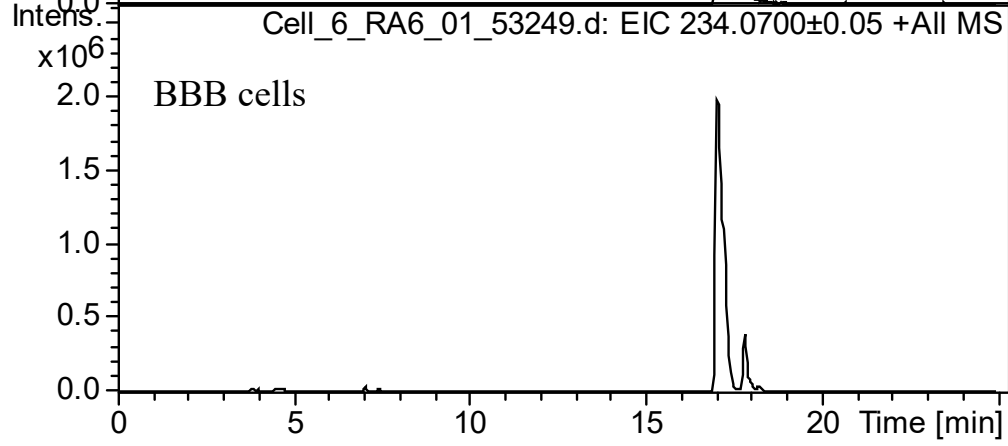

LC-MS/MS of 234.07 at 17.0 min

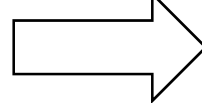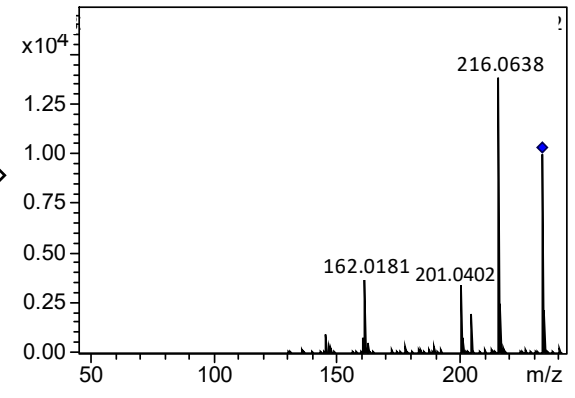

NPRL 818

[M+H]<sup>+</sup> : 679.23 (340.12)

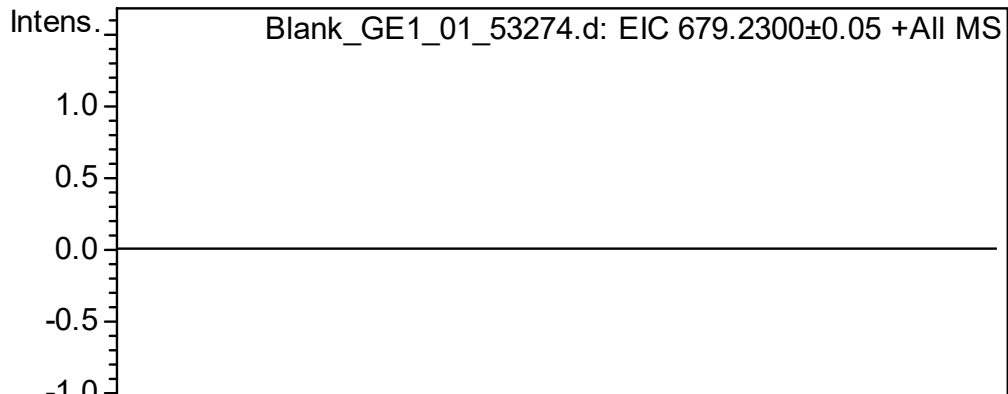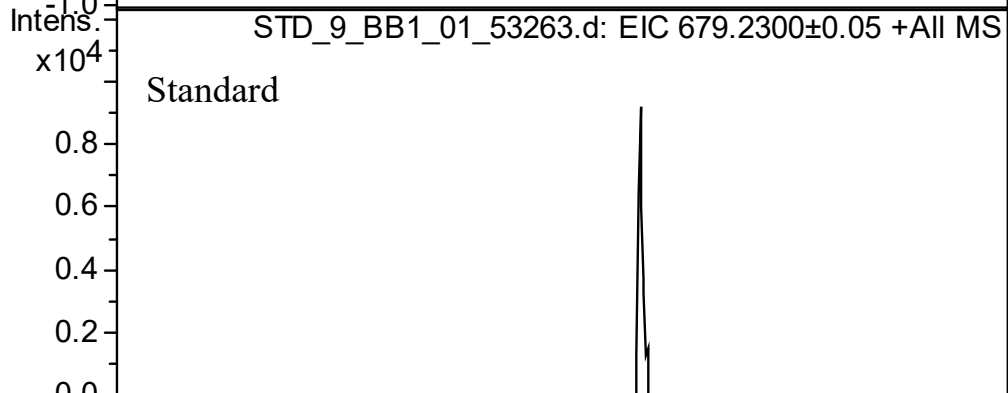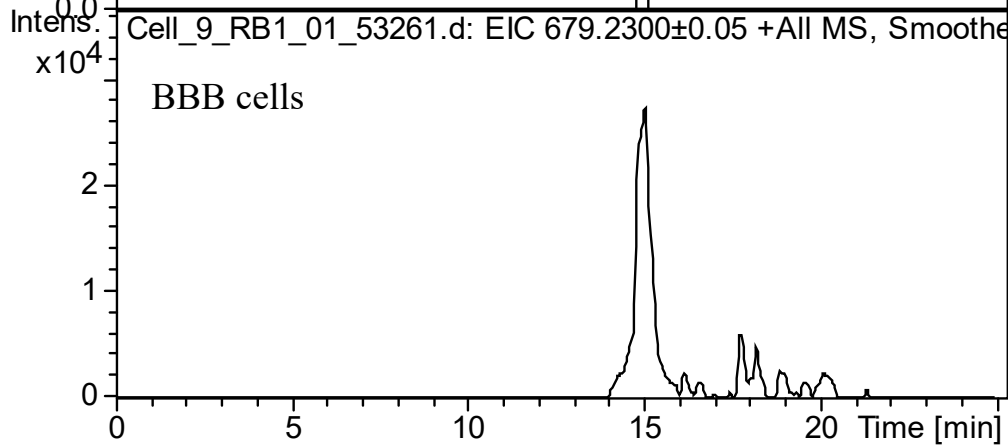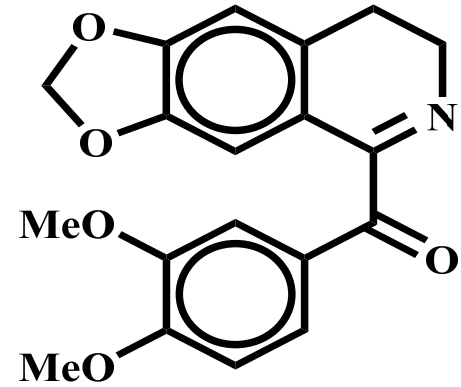

LC-MS/MS  
of 679.23  
at 14.9 min

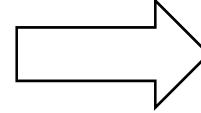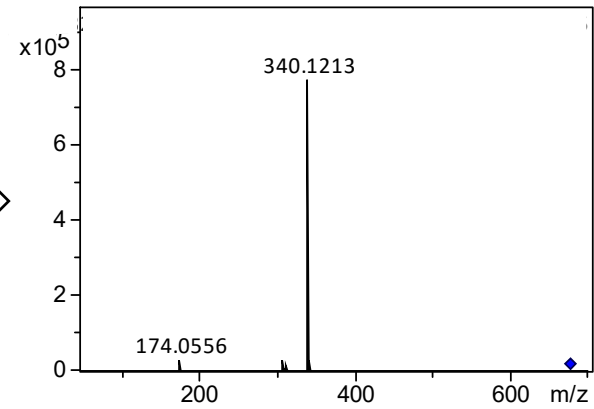

LC-MS/MS  
of 679.23  
at 14.9 min

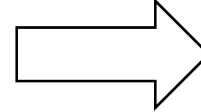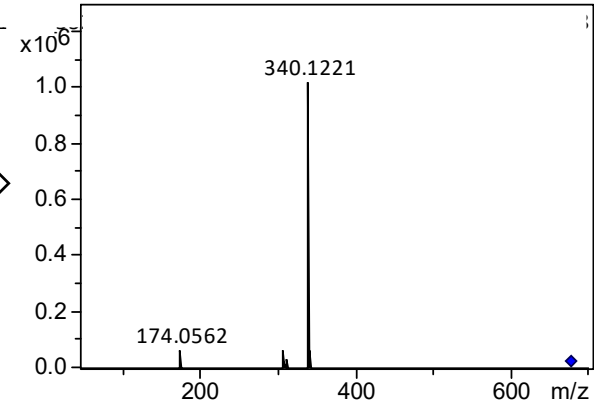

NPRL 833

[M+H]<sup>+</sup> : 501.09

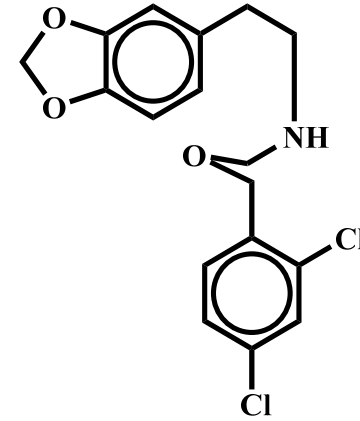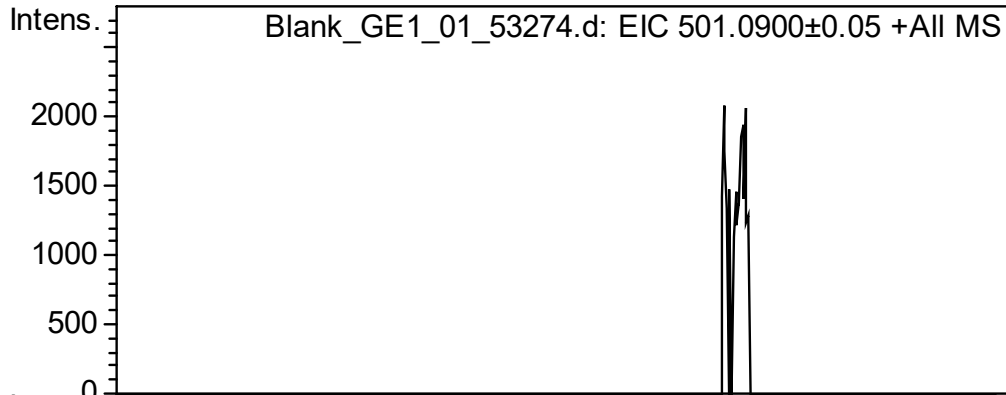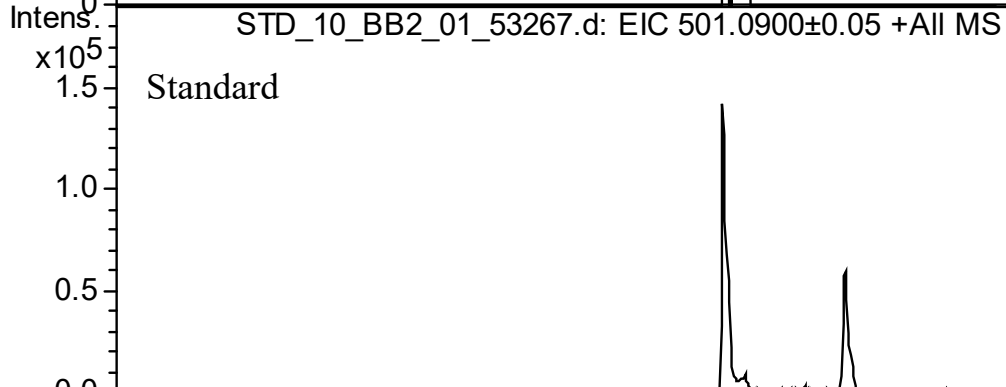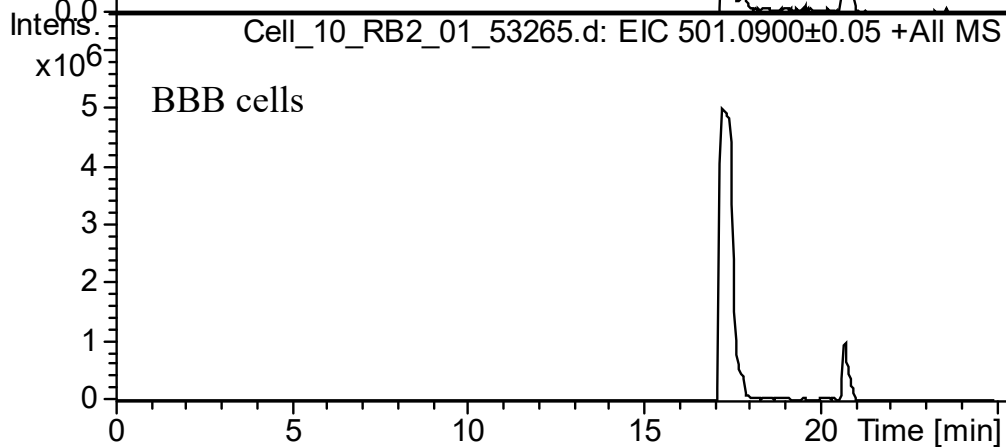

LC-MS/MS  
of 501.09  
at 17.3 min

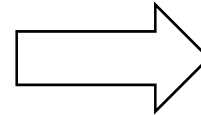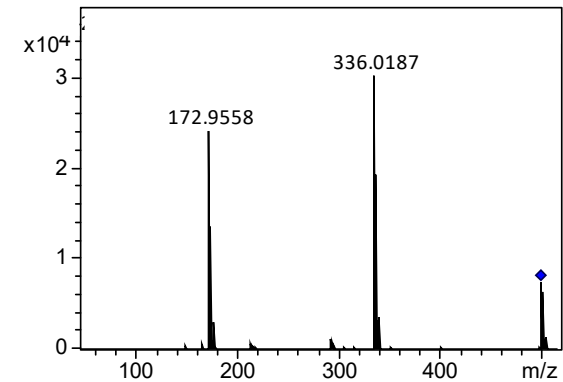

LC-MS/MS  
of 501.09  
at 17.3 min

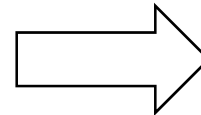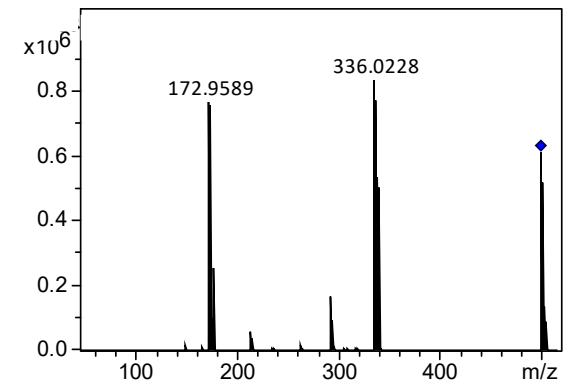

NPRL 835

[M+H]<sup>+</sup> : 336.05

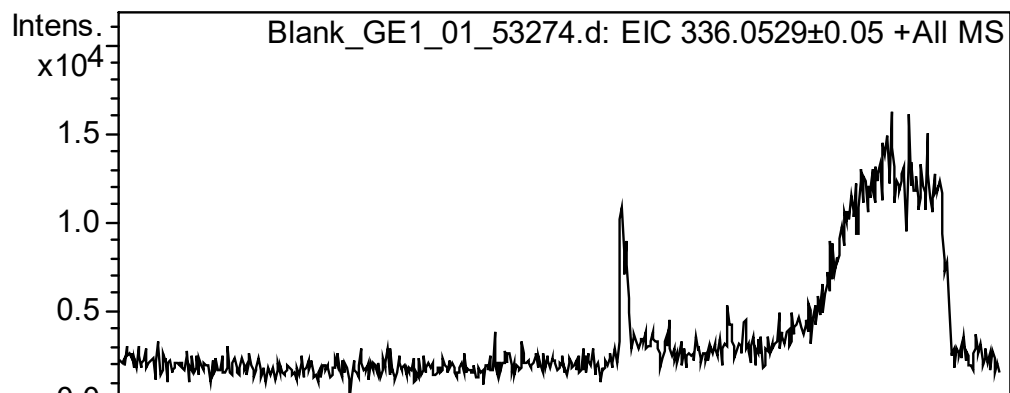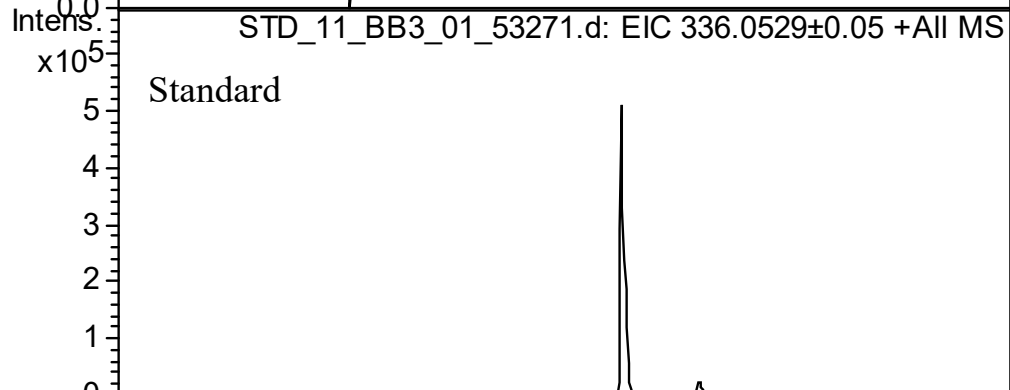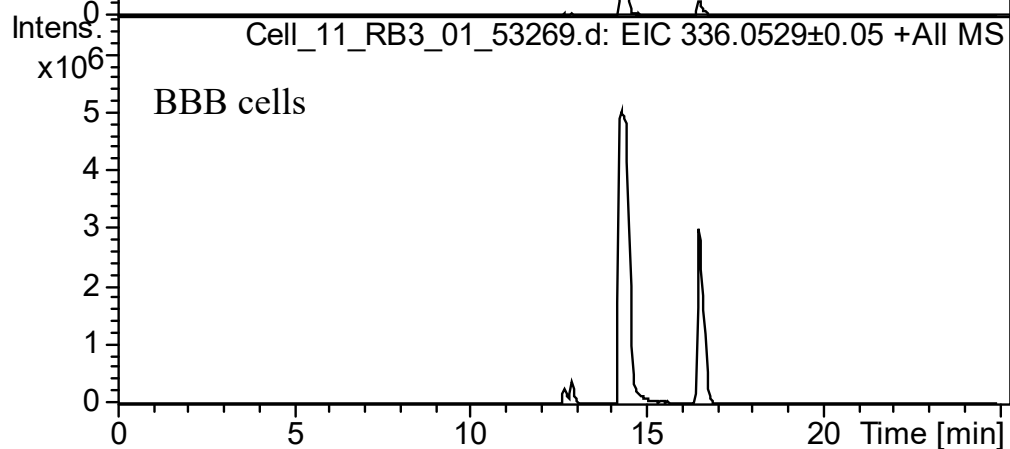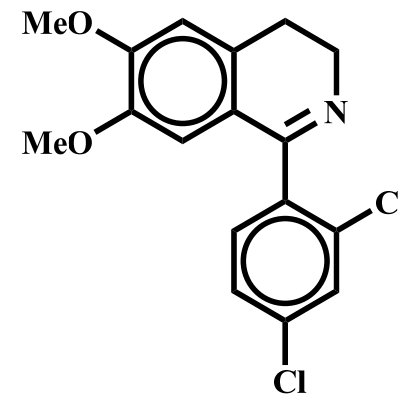

LC-MS/MS  
of 336.05  
at 14.3 min

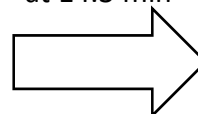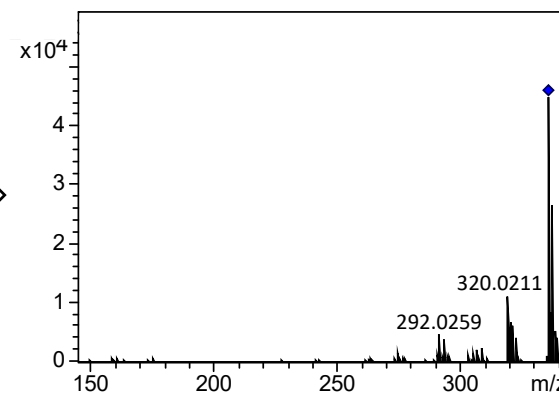

LC-MS/MS  
of 336.05  
at 14.3 min

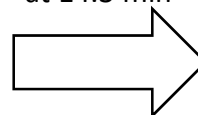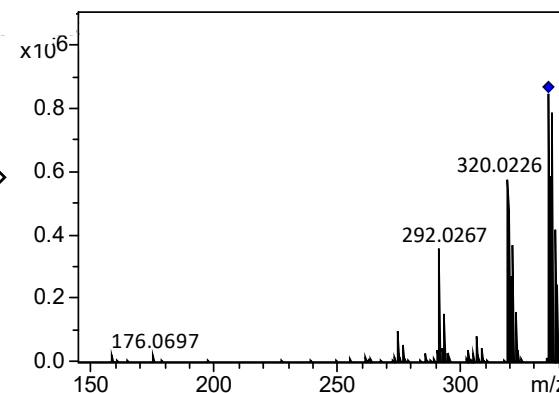



NPRL 836

[M+H]<sup>+</sup> : 334.03

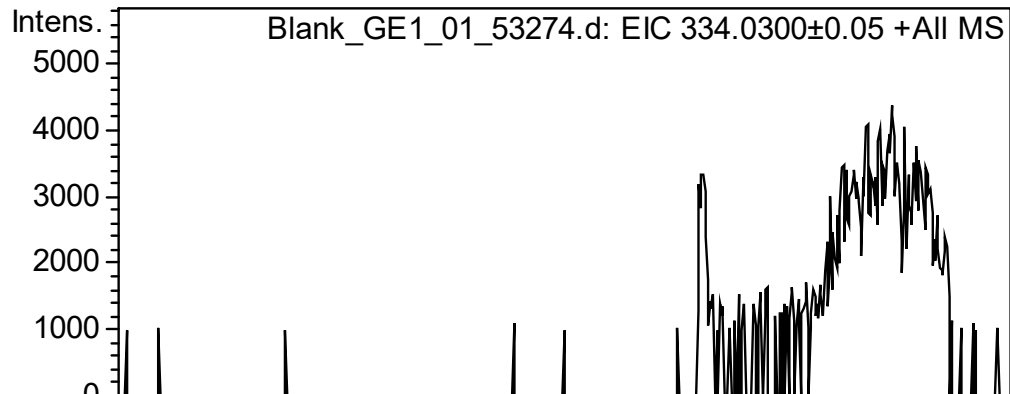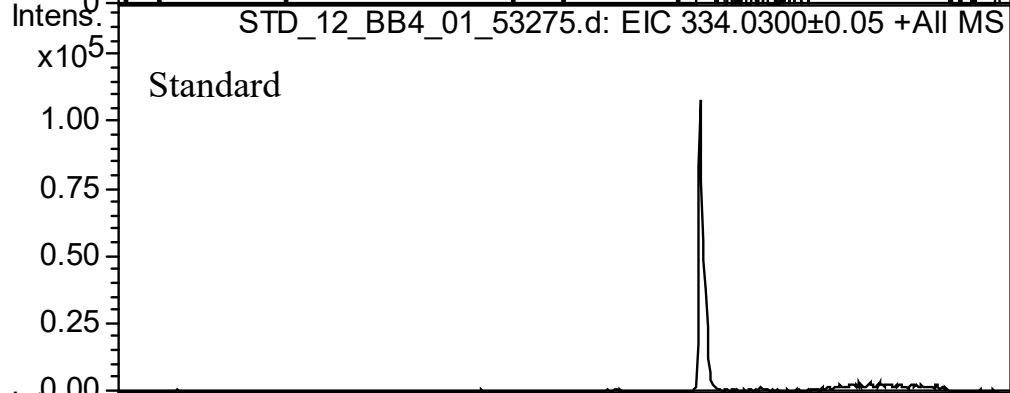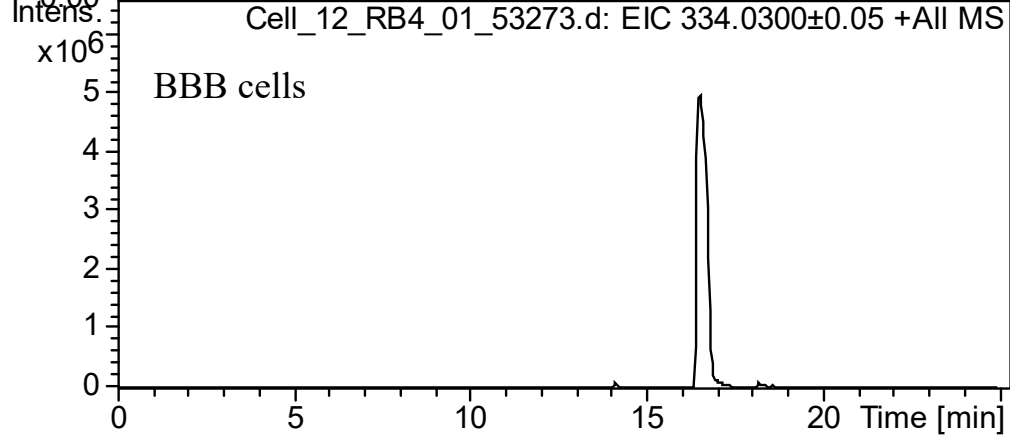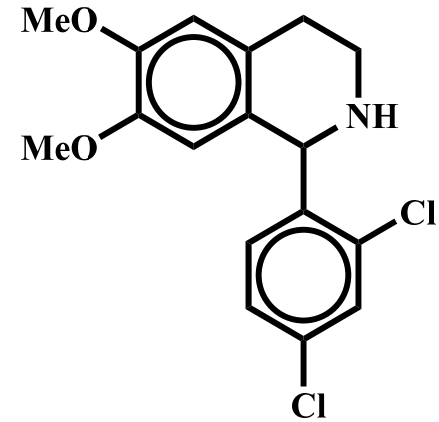

LC-MS/MS  
of 334.03  
at 16.5 min

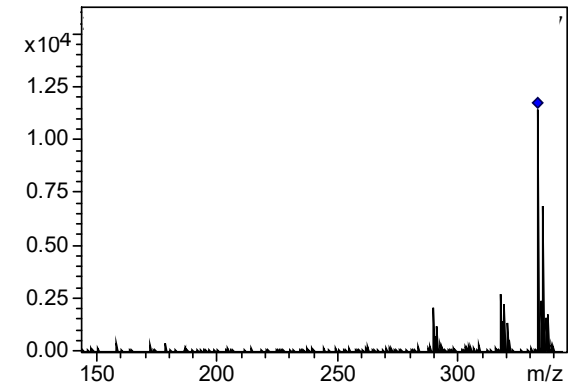

LC-MS/MS  
of 334.03  
at 16.5 min

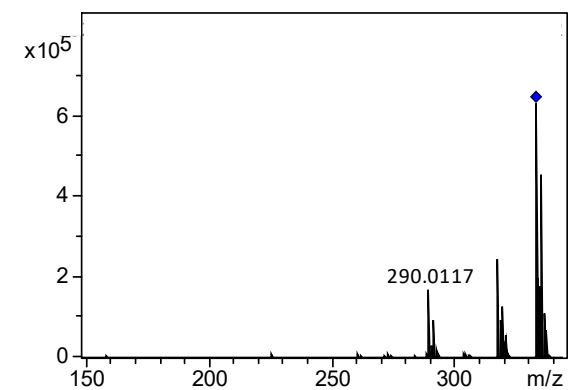

NPRL 842

$[M+H]^+$  : 229.05

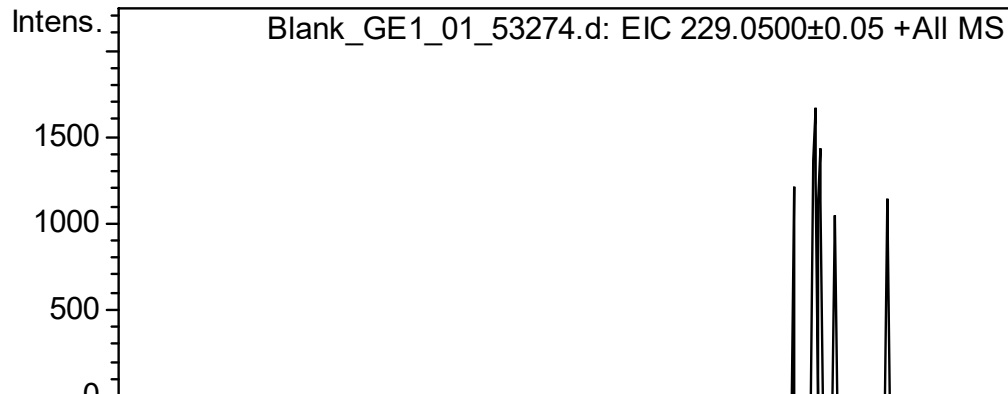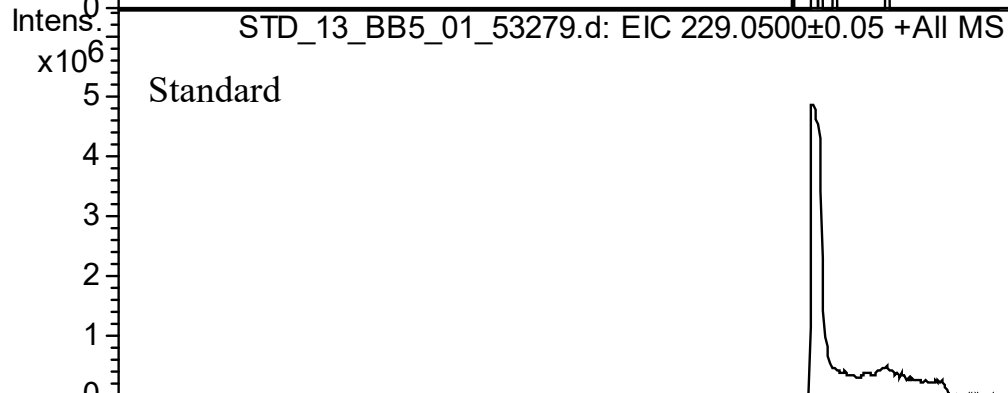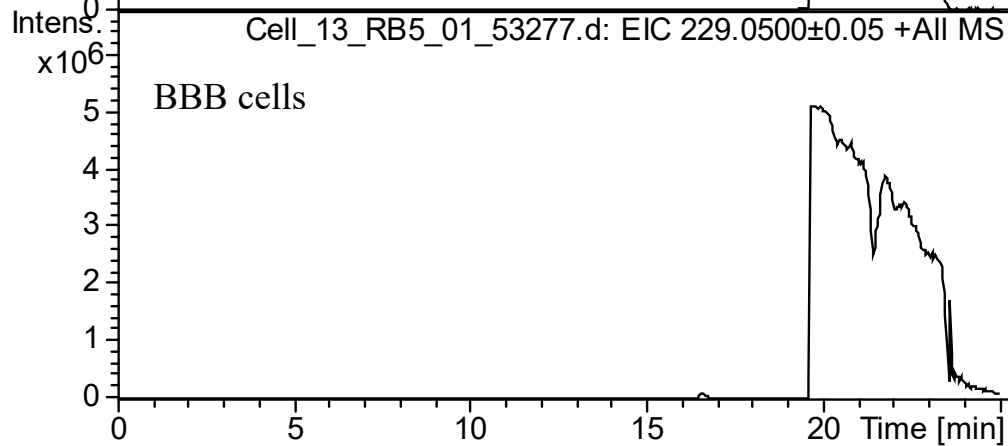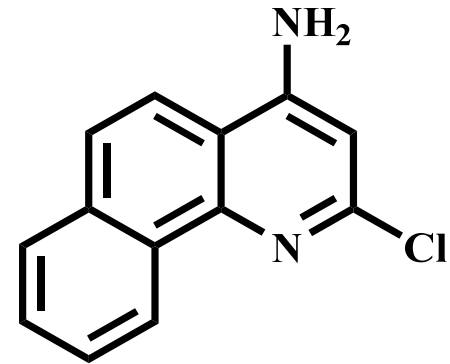

LC-MS/MS  
of 229.05  
at 20.0 min

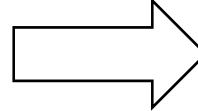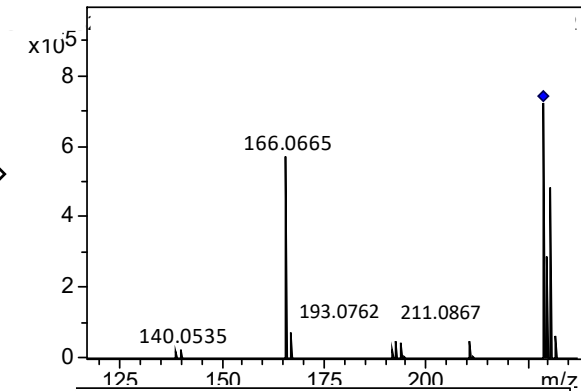

LC-MS/MS  
of 229.05  
at 20.0 min

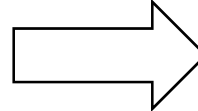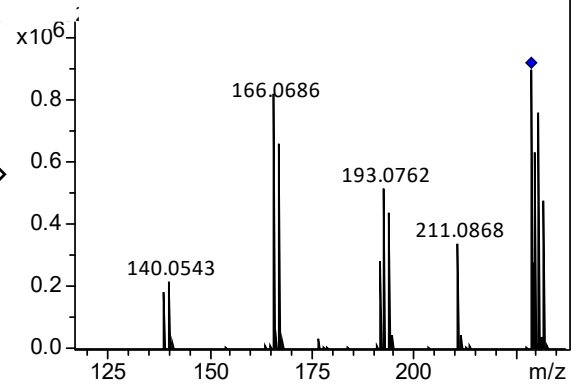

NPRL 1089

$[M+H]^+$  : 284.12

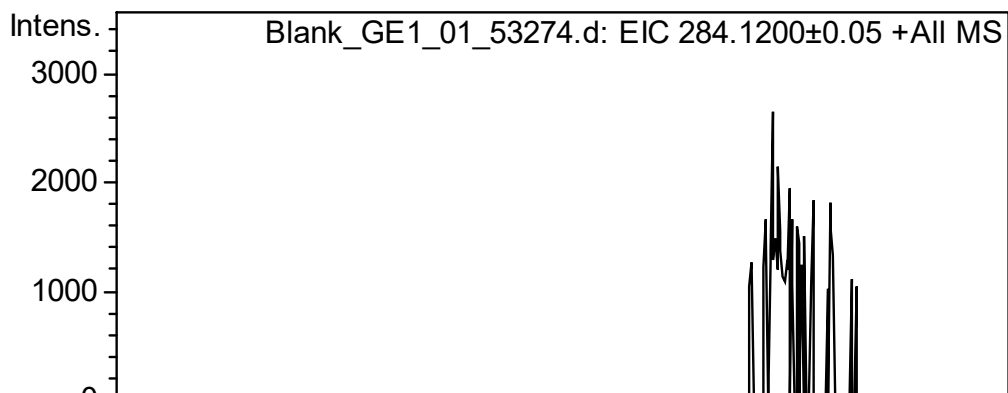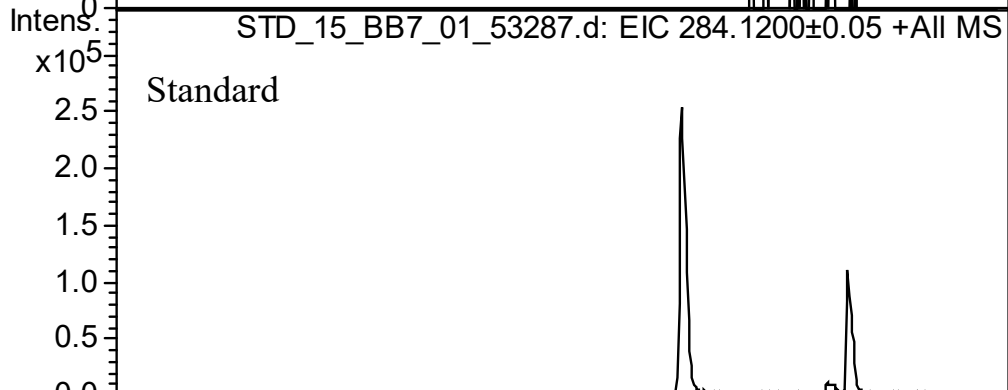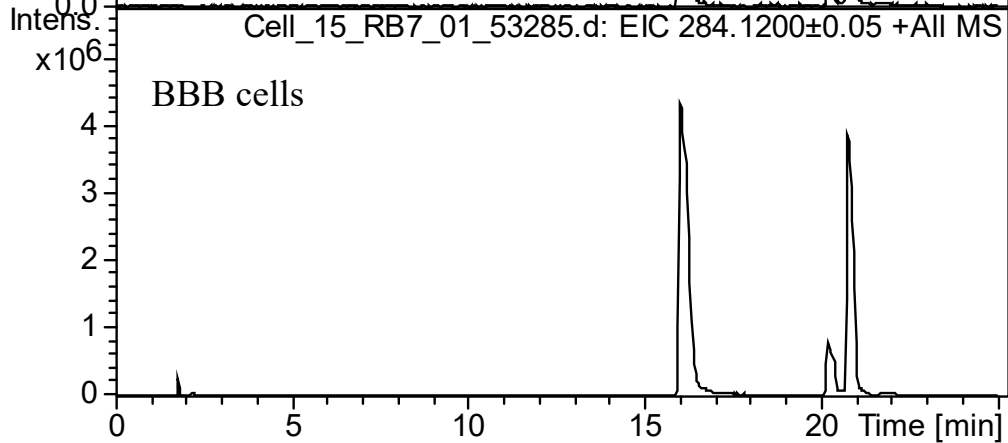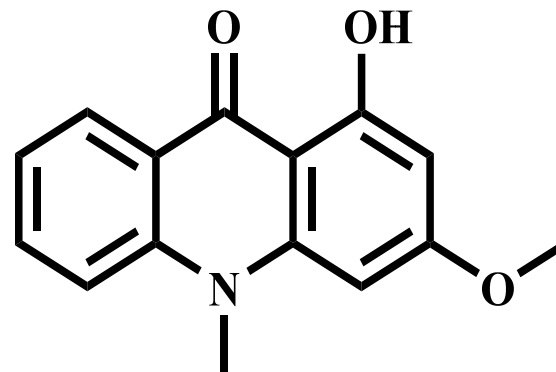

LC-MS/MS  
of 284.12  
at 16.0 min

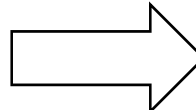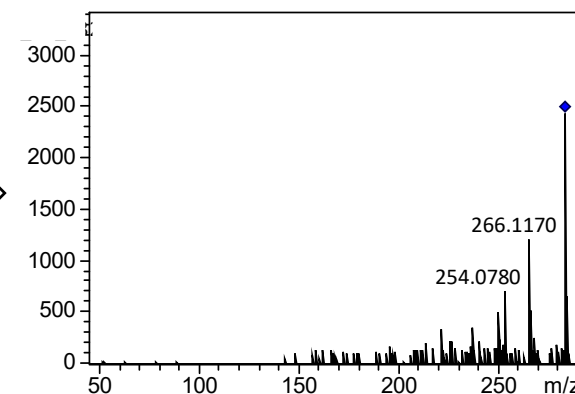

LC-MS/MS  
of 284.12  
at 16.0 min

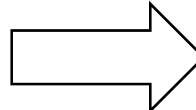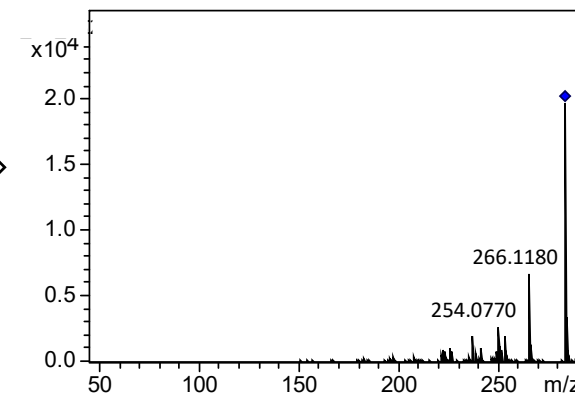

NPRL 1185

[M+H]<sup>+</sup> : 503.12

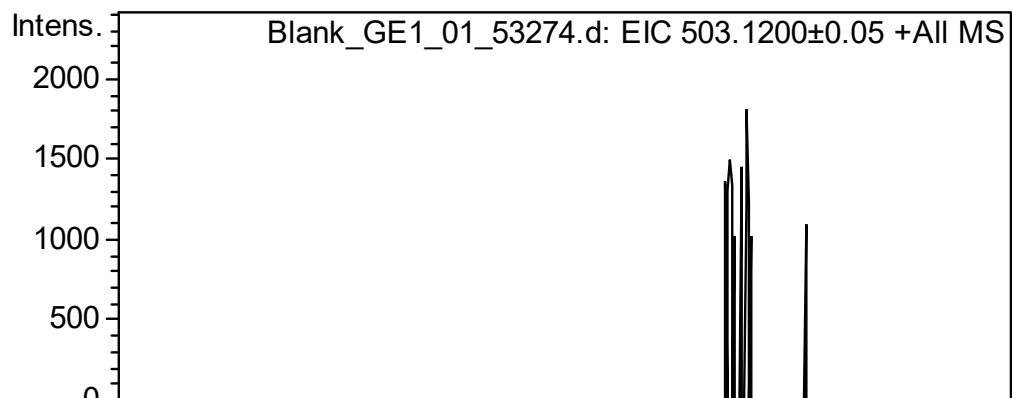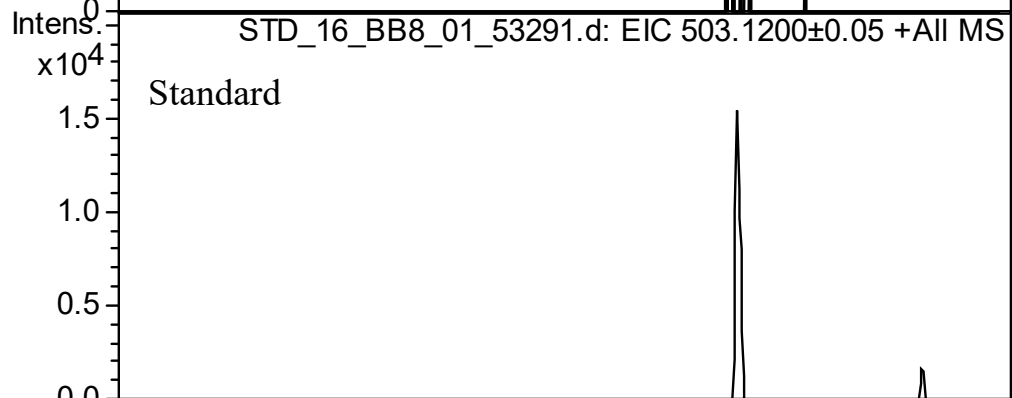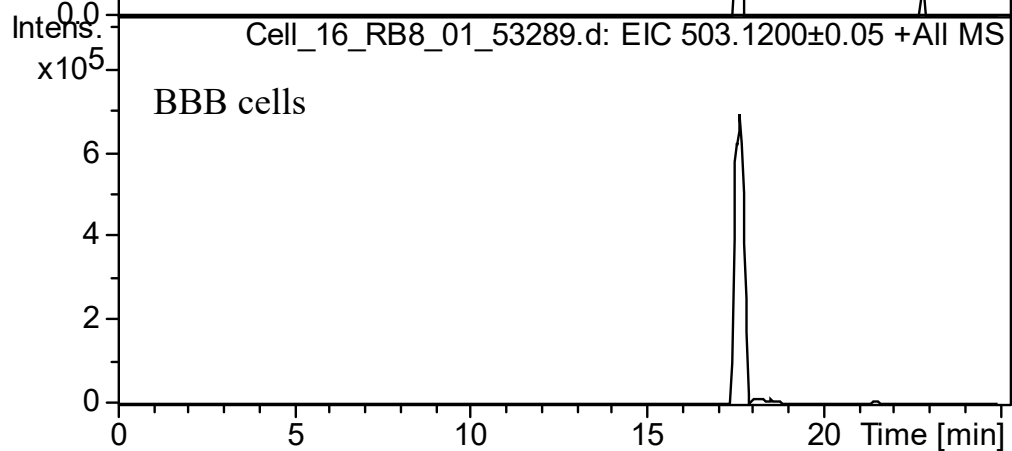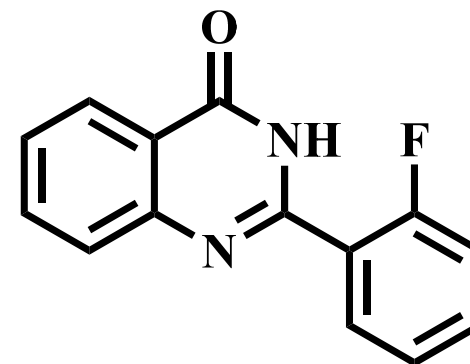

LC-MS/MS  
of 503.12  
at 17.6 min

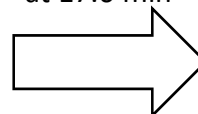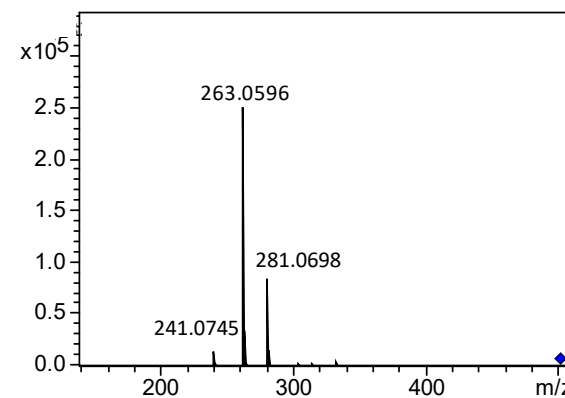

LC-MS/MS  
of 503.12  
at 17.6 min

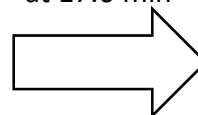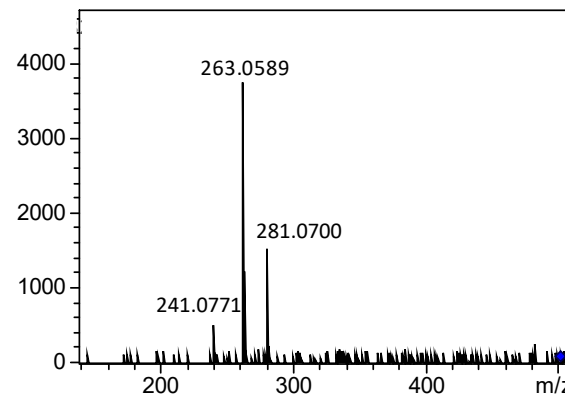

NPRL 1188

[M+H]<sup>+</sup>: 301.09

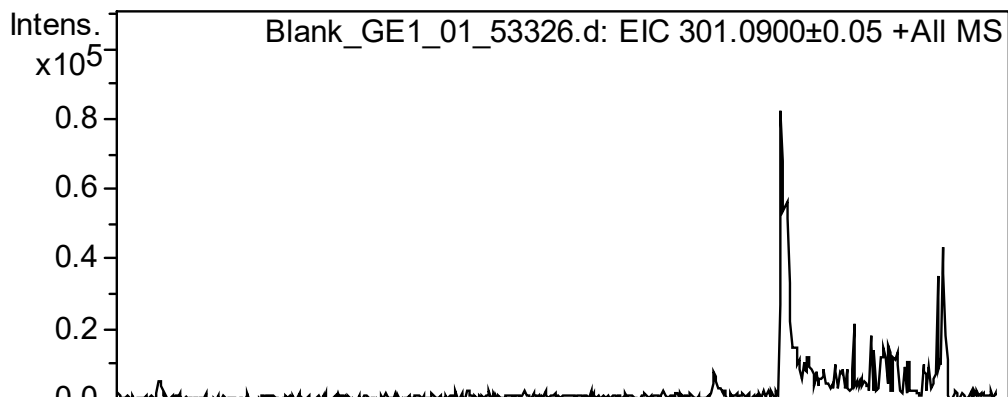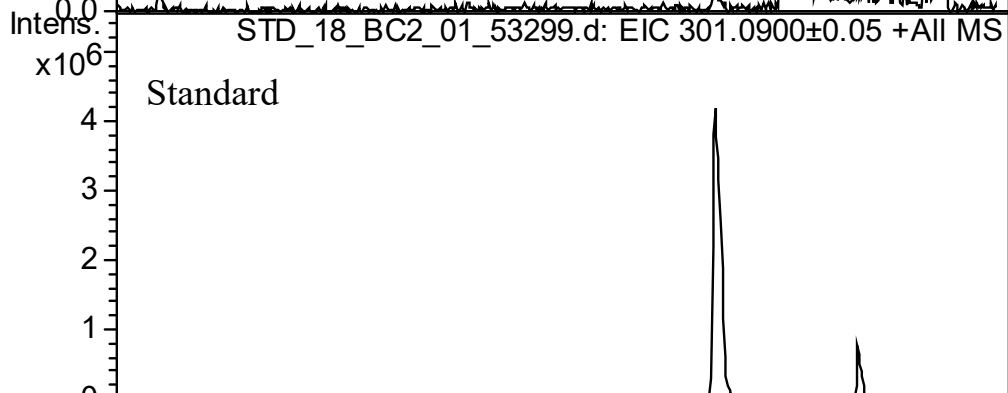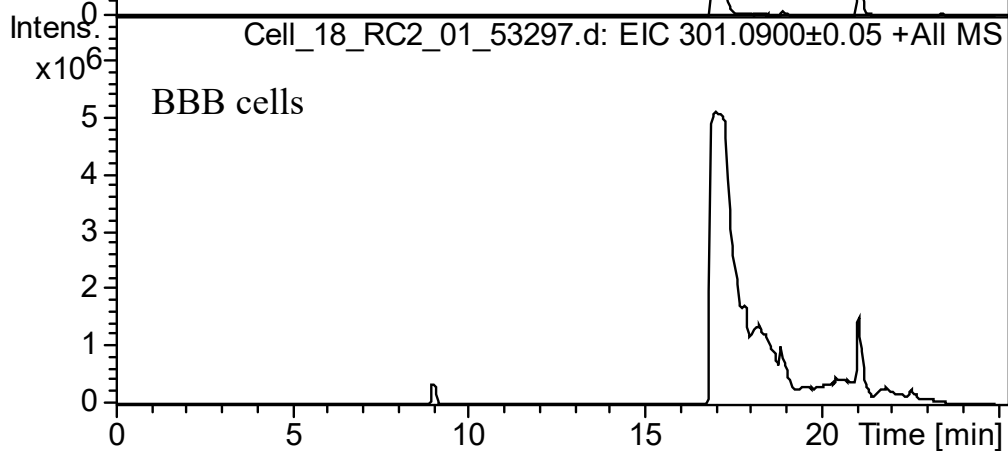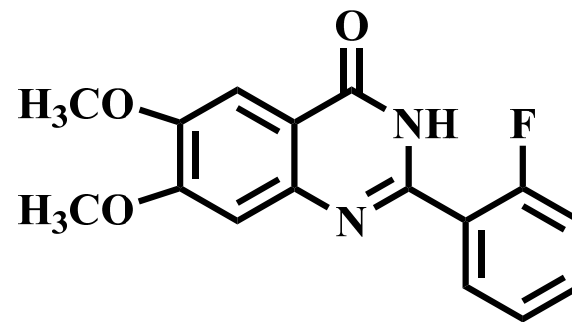

LC-MS/MS  
of 301.09  
at 16.9 min

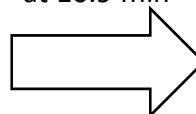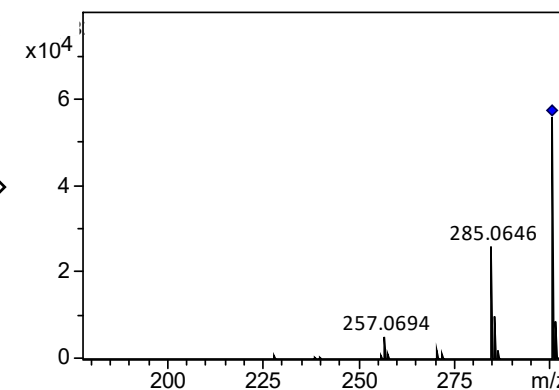

LC-MS/MS  
of 301.09  
at 16.9 min

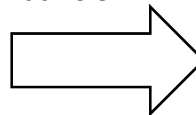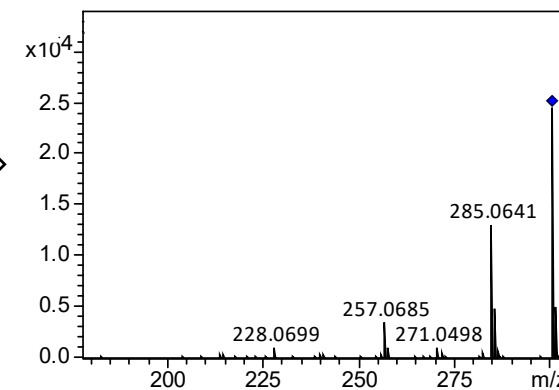

NPRL 1192

$[M+H]^+$  : 332.03

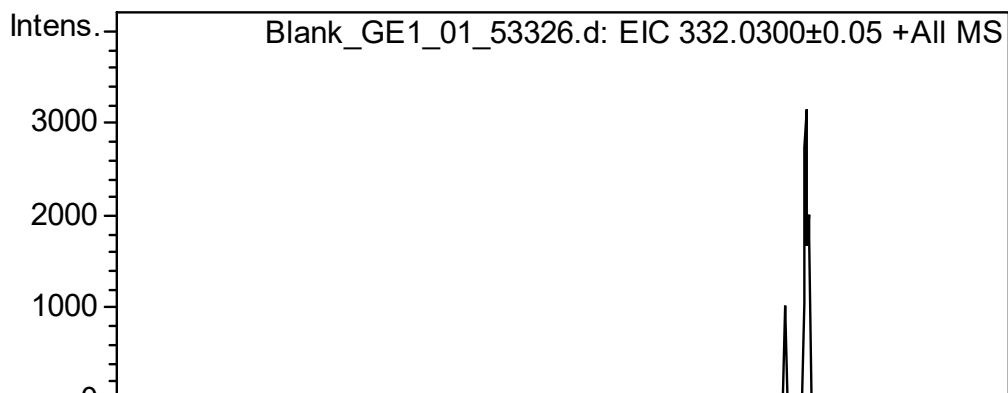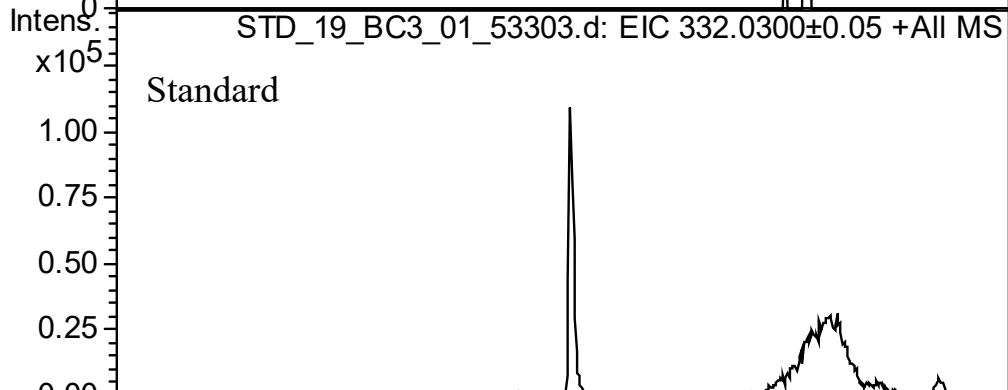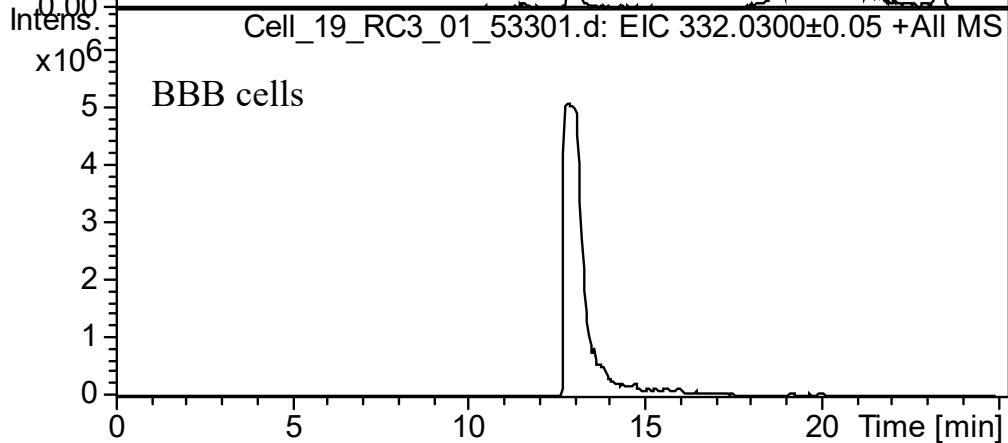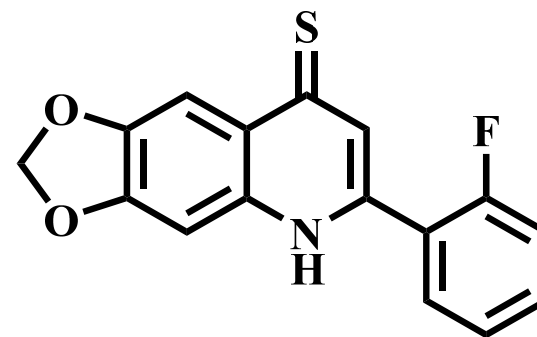

LC-MS/MS  
of 332.03  
at 12.9 min

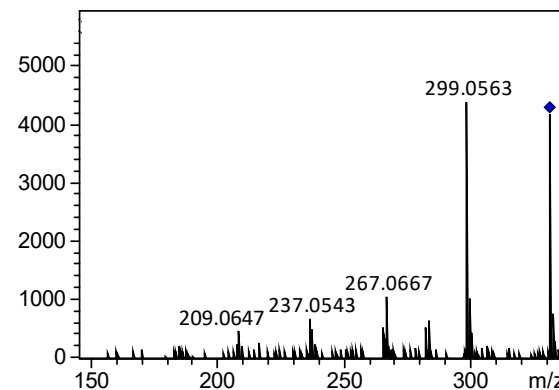

LC-MS/MS  
of 332.03  
at 12.9 min

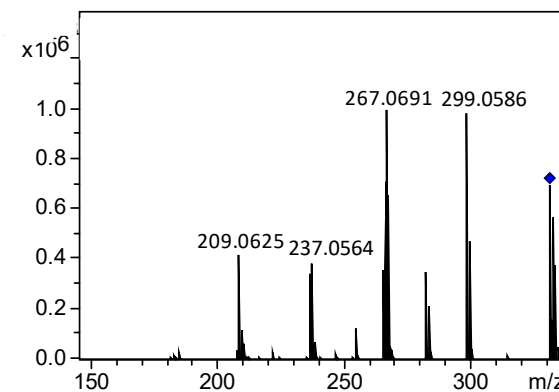

NPRL 1195

[M+H]<sup>+</sup> : 254.11

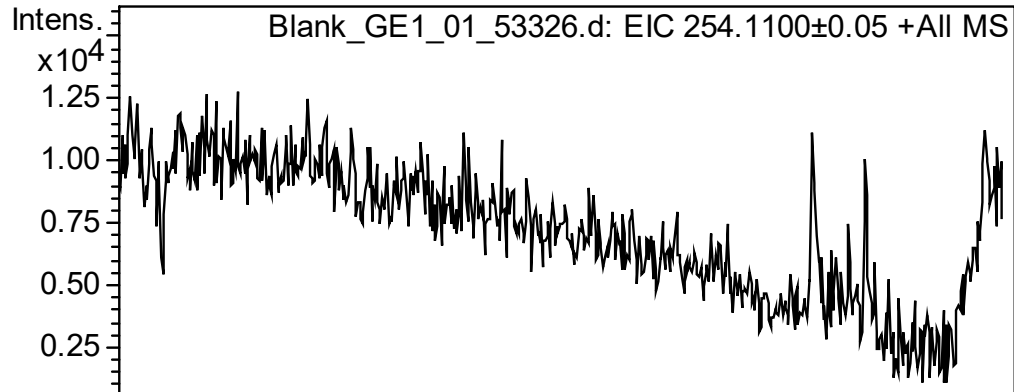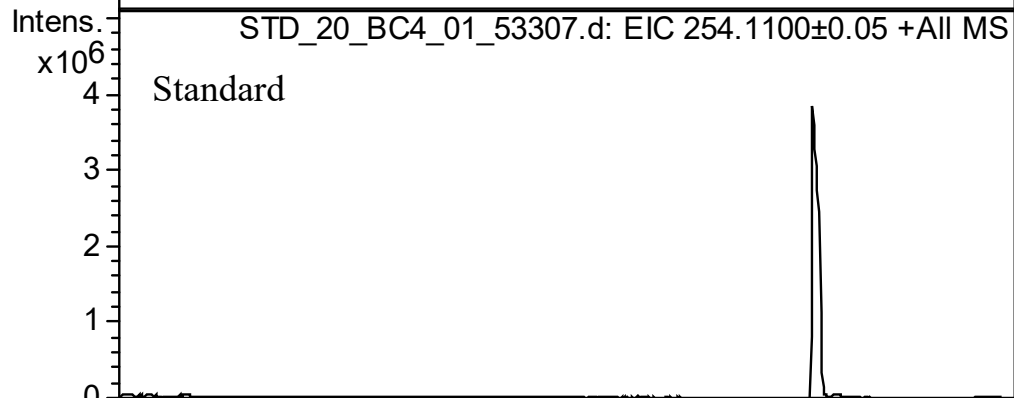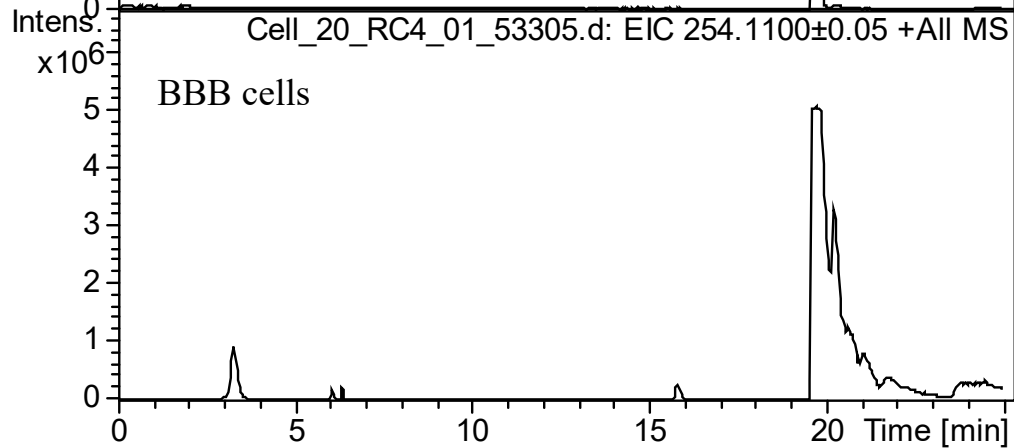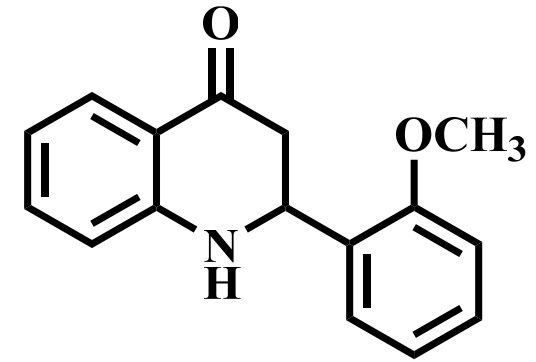

LC-MS/MS  
of 254.11  
at 19.7 min

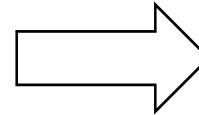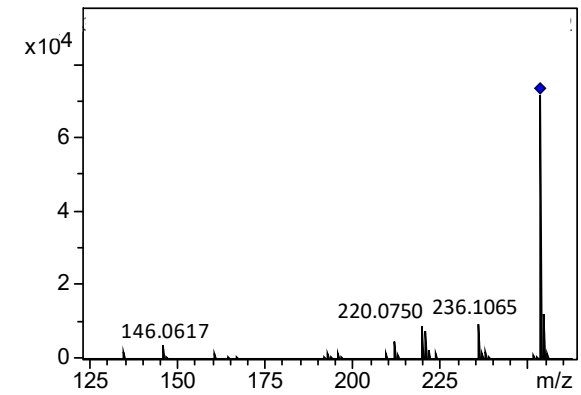

LC-MS/MS  
of 254.11  
at 19.7 min

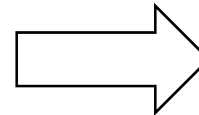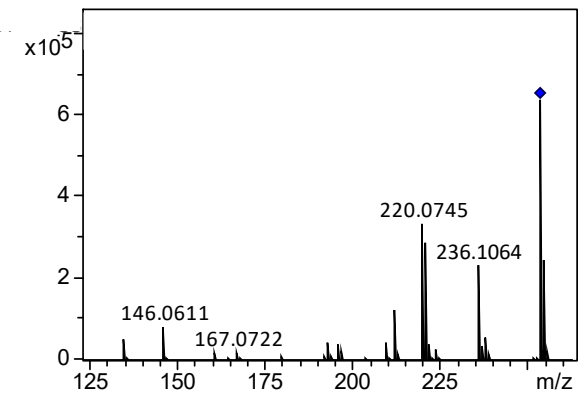

NPRL 1241

$[M+H]^+$  : 284.07

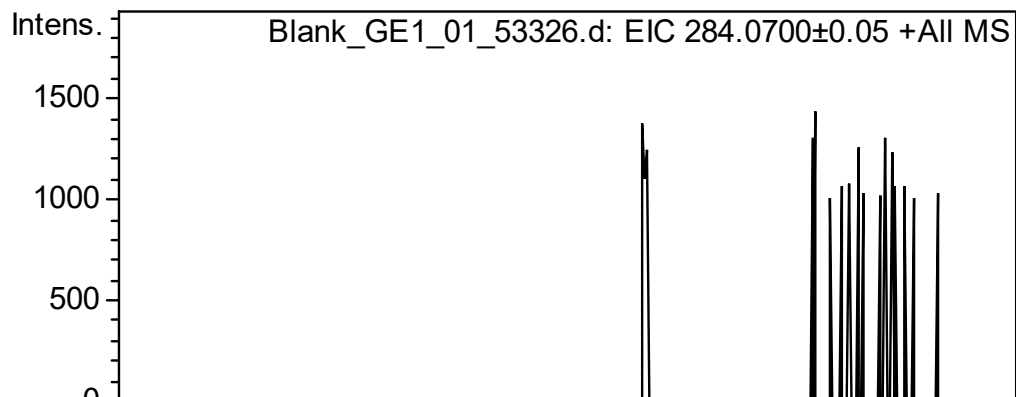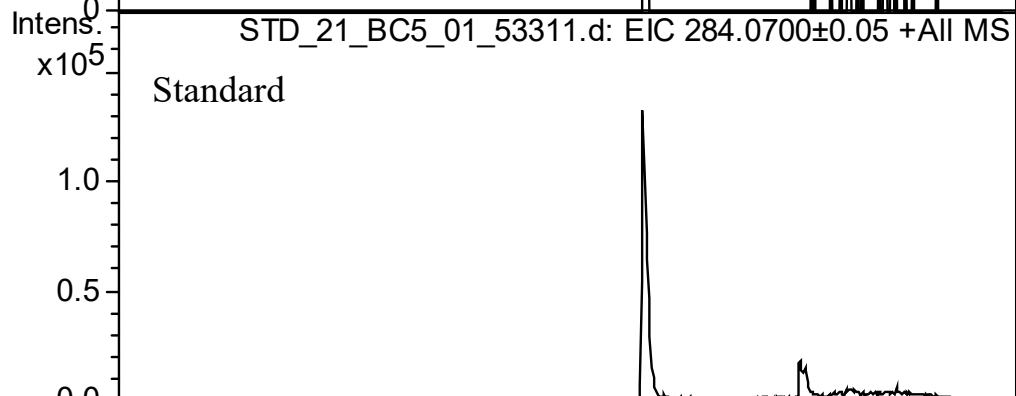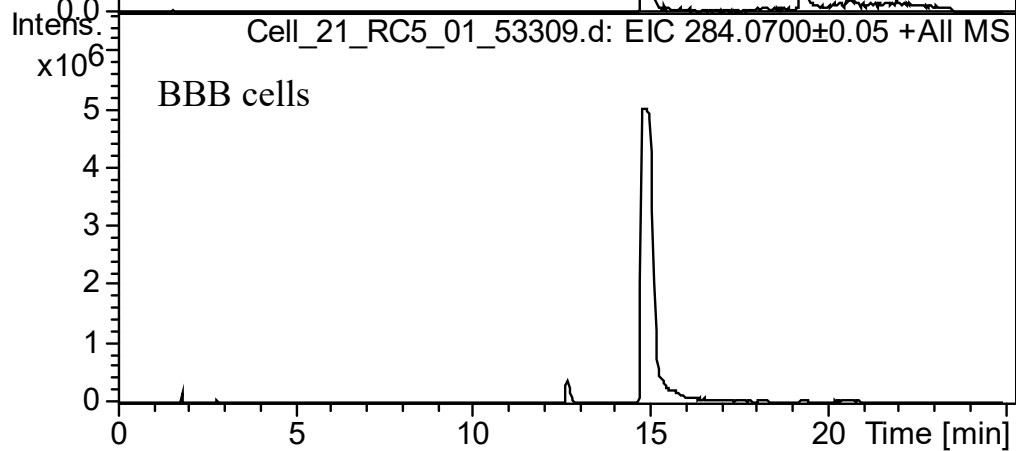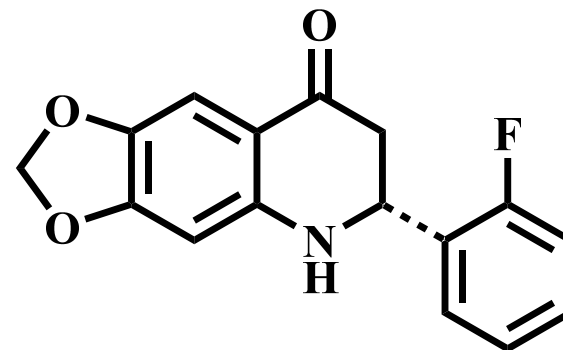

LC-MS/MS  
of 284.07  
at 15.0 min

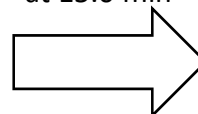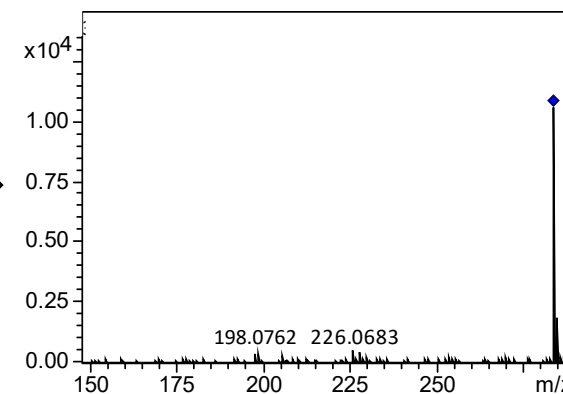

LC-MS/MS  
of 284.07  
at 15.0 min

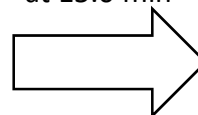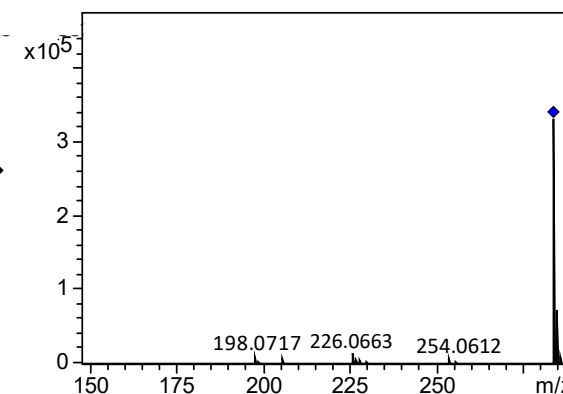



NPRL 1958

[M+H]<sup>+</sup> : 322.13

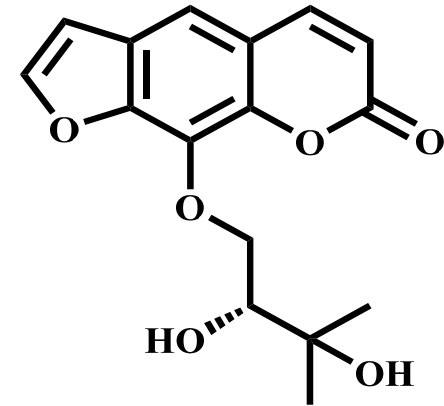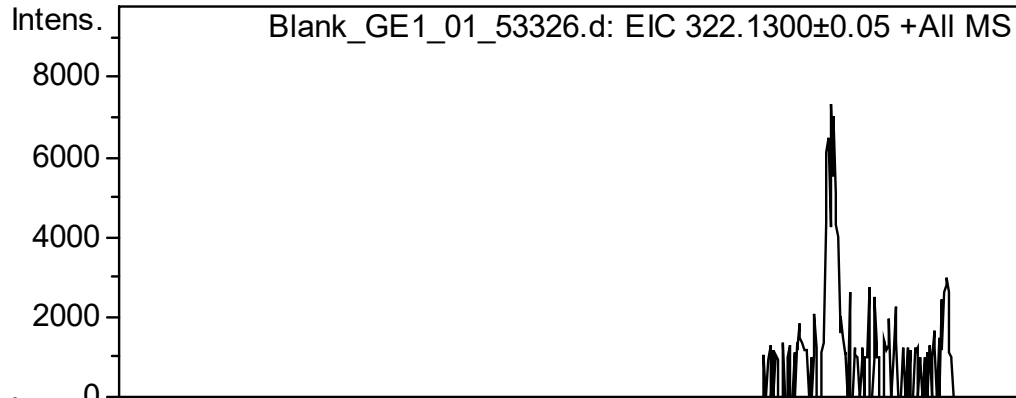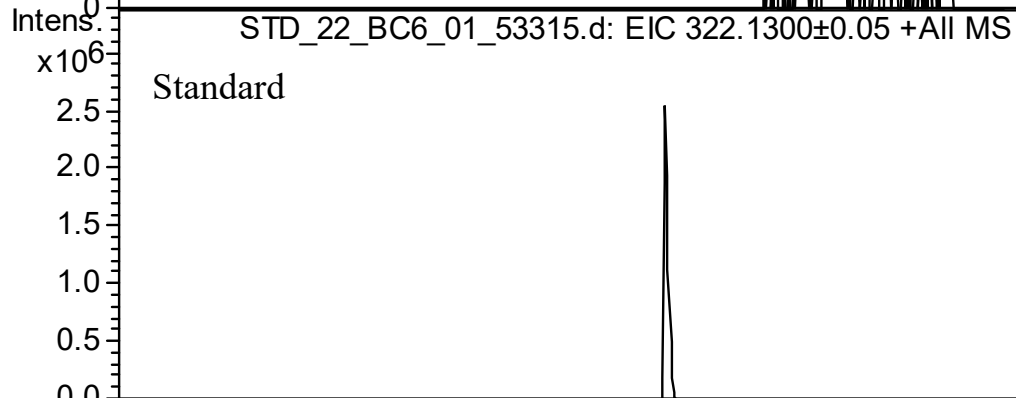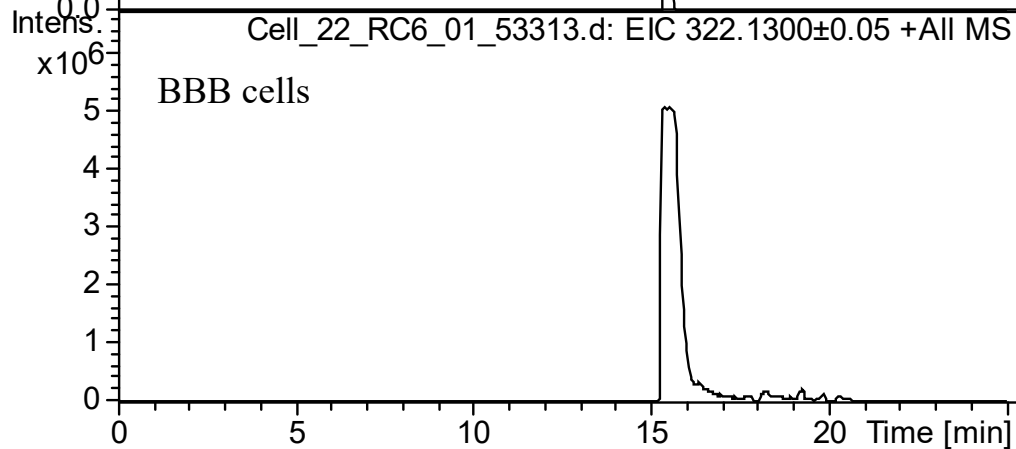

LC-MS/MS  
of 322.13  
at 15.4 min

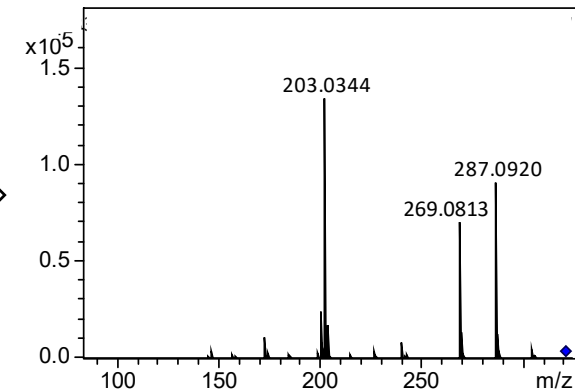

LC-MS/MS  
of 322.13  
at 15.4 min

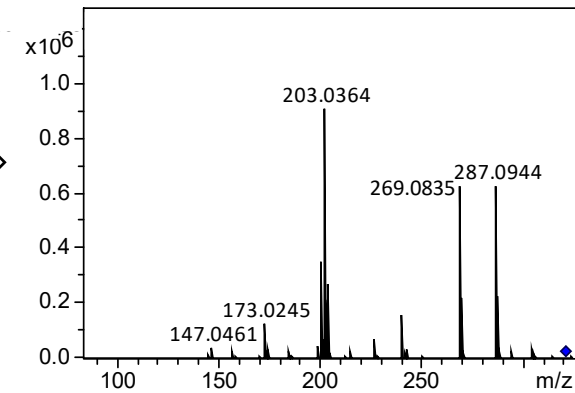

NPRL 2026

[M+H]<sup>+</sup> : 215.10

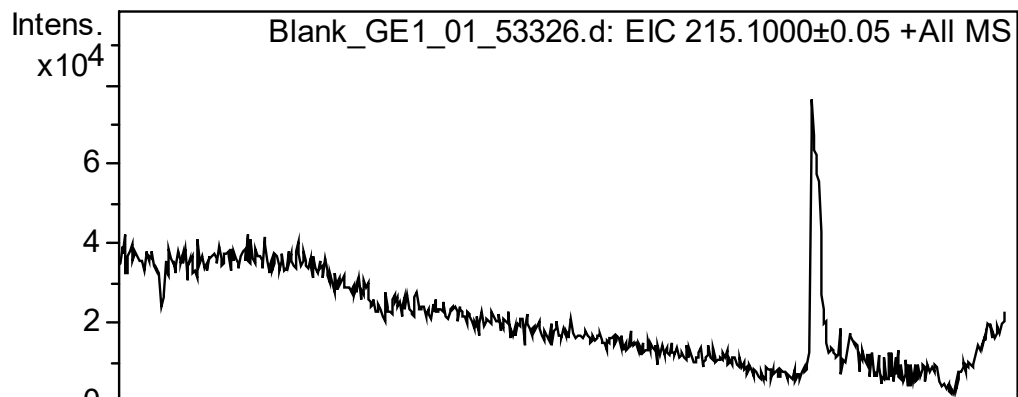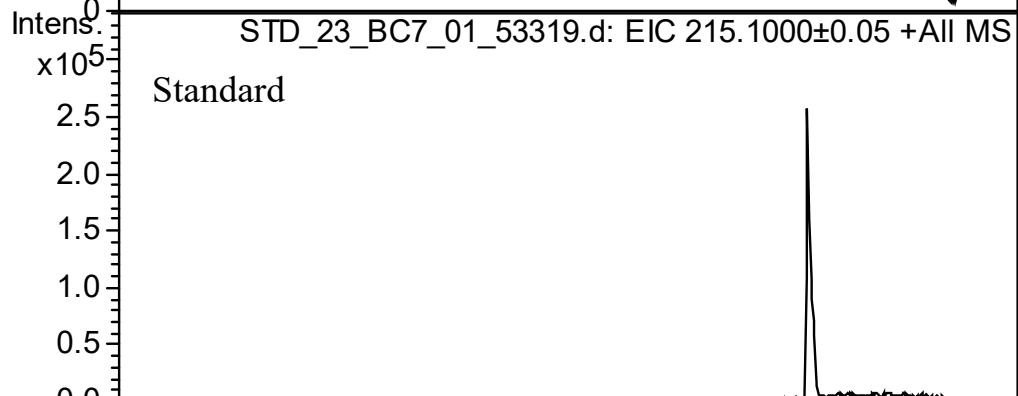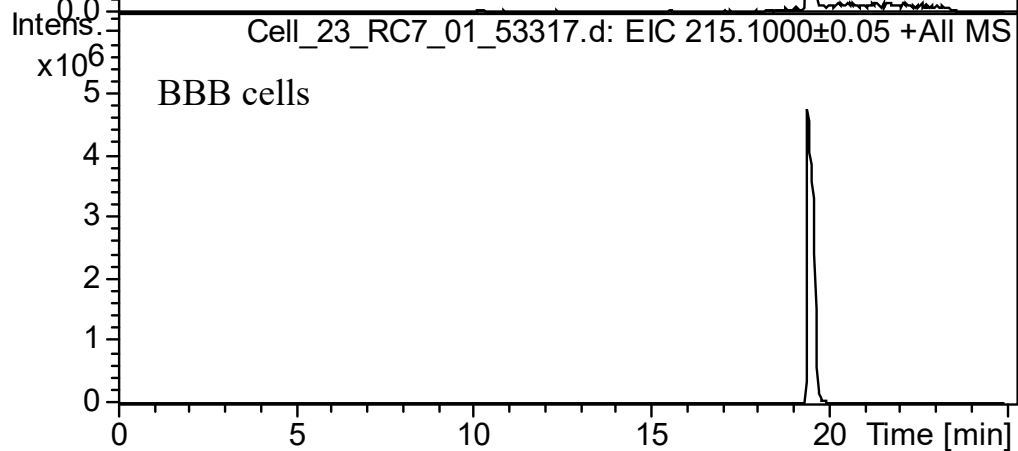

LC-MS/MS  
of 215.10  
at 19.4 min

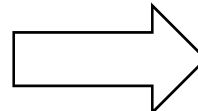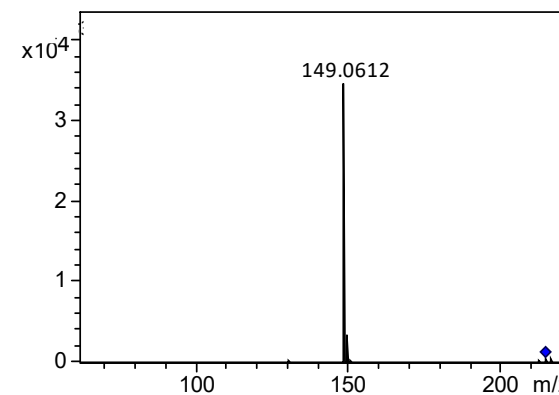

LC-MS/MS  
of 215.10  
at 19.4 min

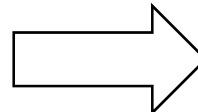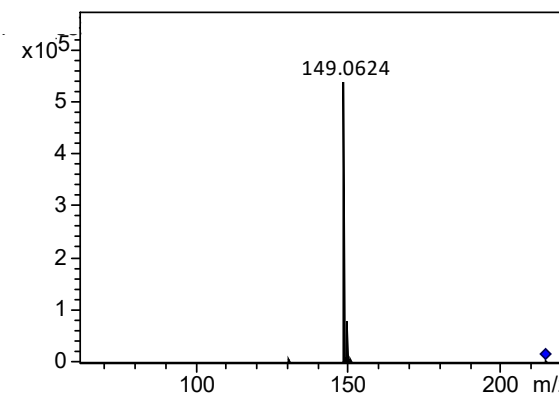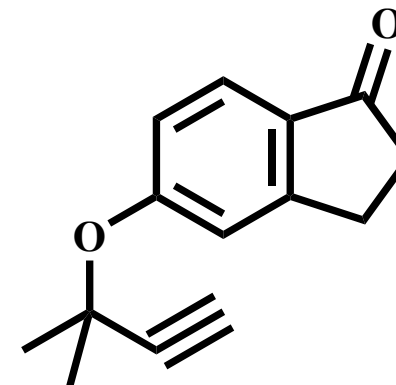

NPRL 2029

$[M+H]^+$  : 215.10

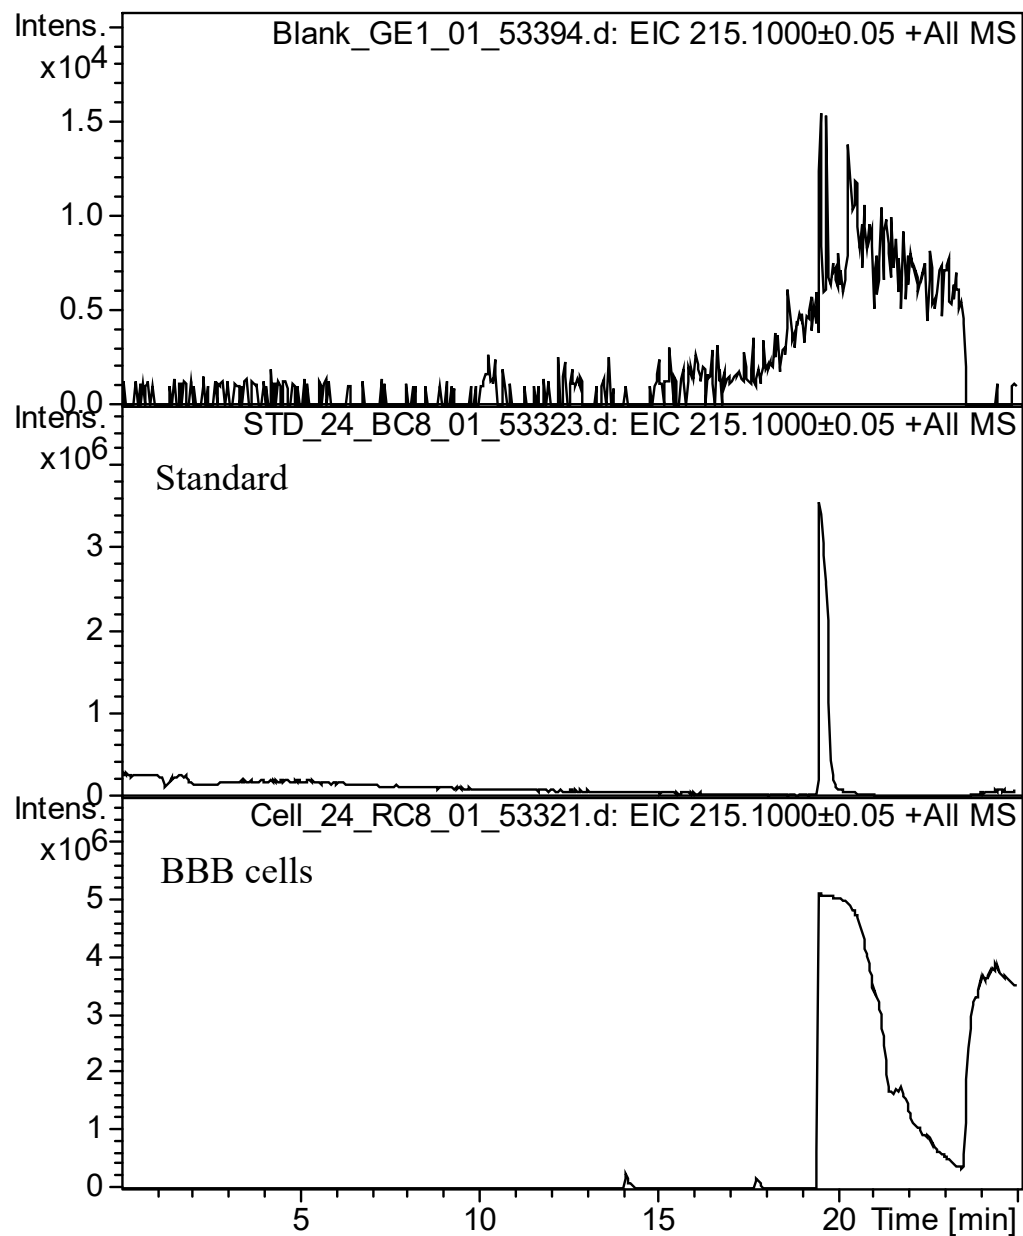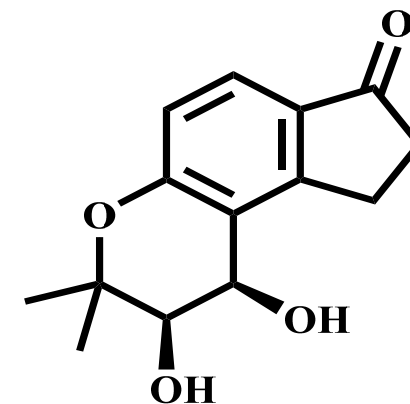

LC-MS/MS  
of 215.10  
at 19.5 min

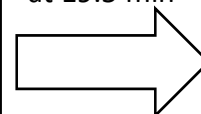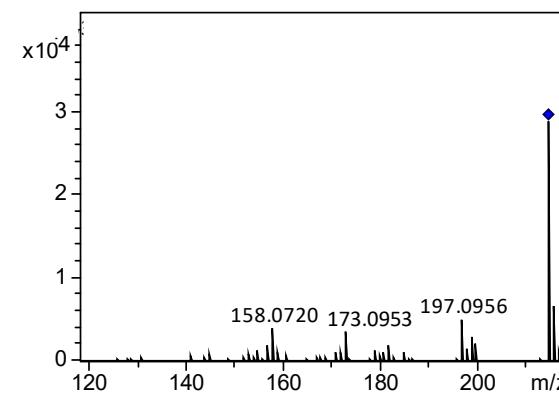

LC-MS/MS  
of 215.10  
at 19.5 min

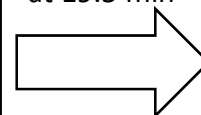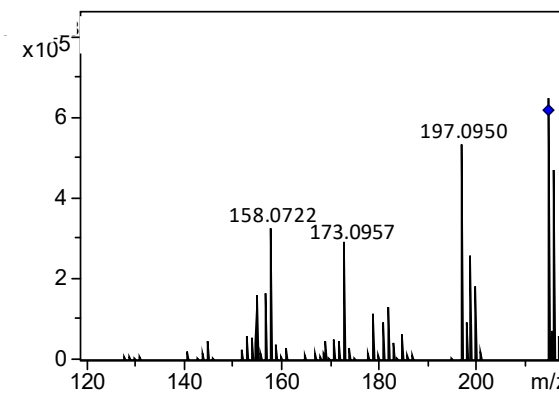

NPRL 2051

$[M+H]^+$  : 249.11

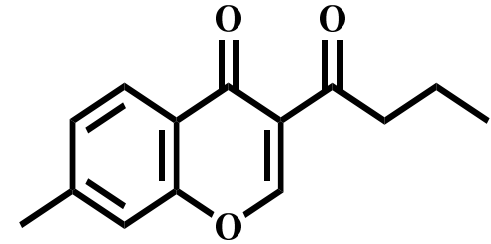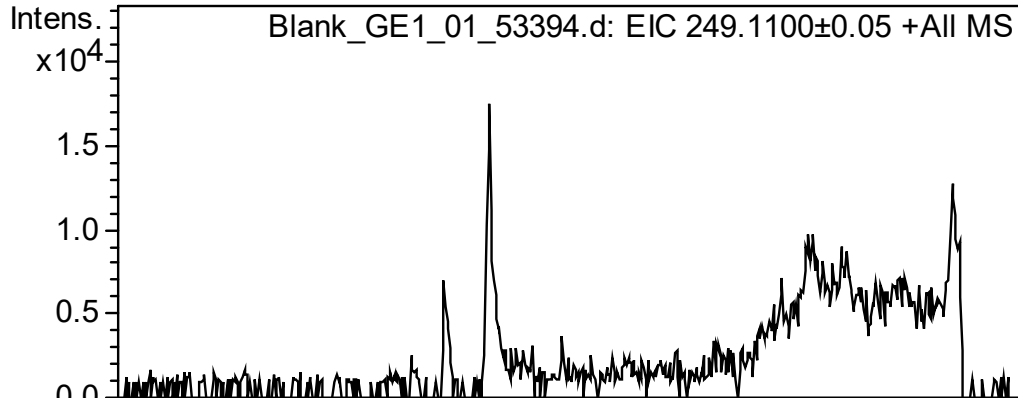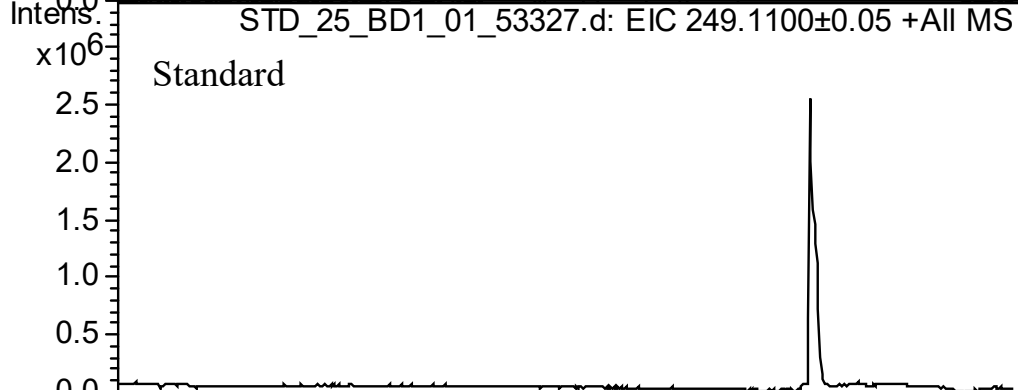

LC-MS/MS  
of 249.11  
at 19.2 min

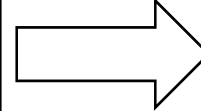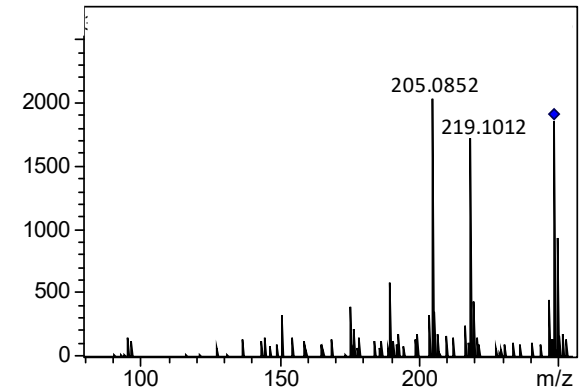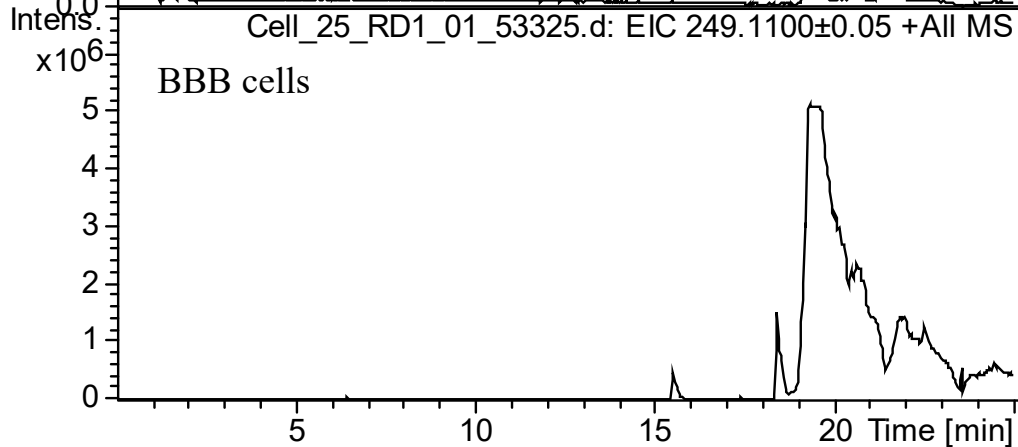

LC-MS/MS  
of 249.11  
at 19.2 min

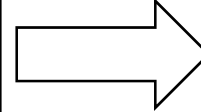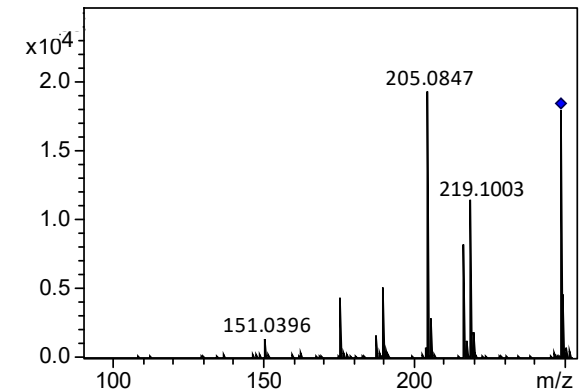

NPRL 2059

[M+H]<sup>+</sup> : 305.13

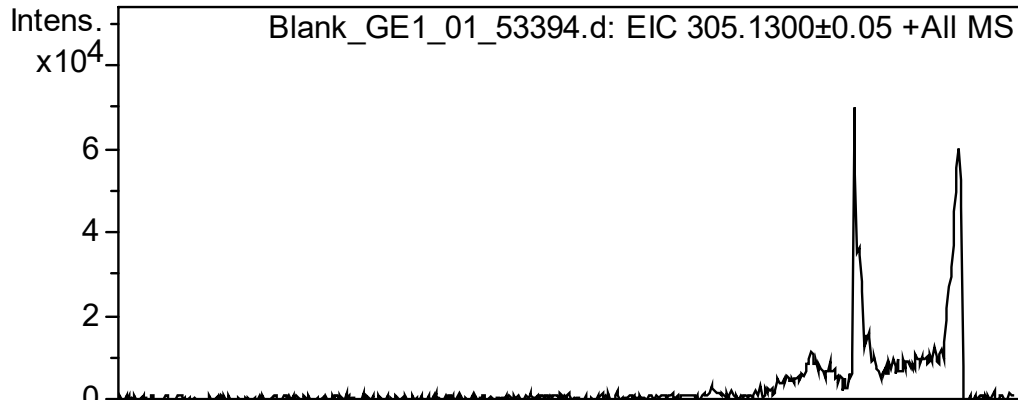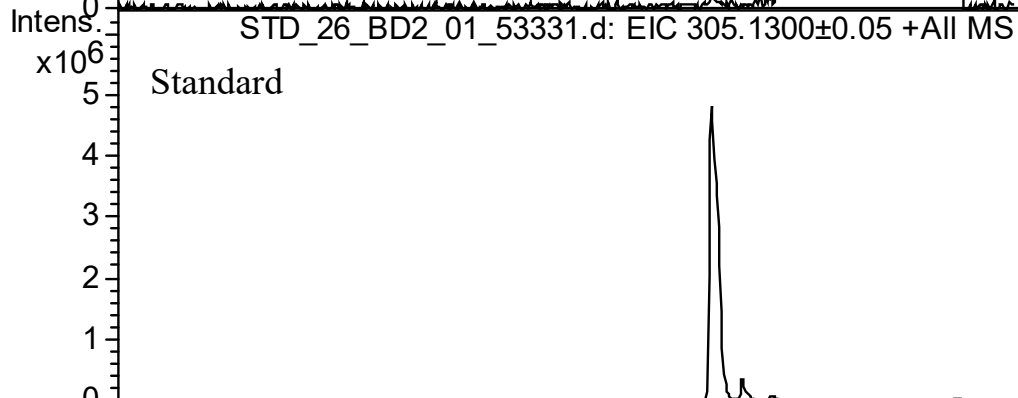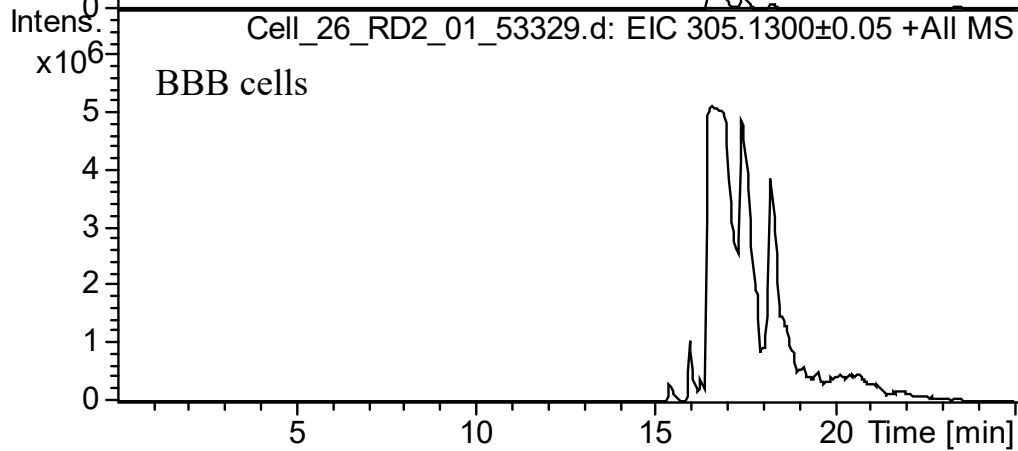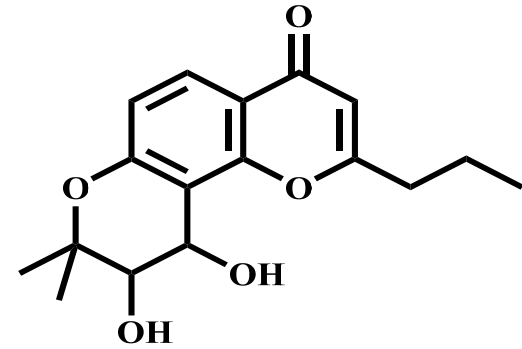

LC-MS/MS  
of 305.13  
at 16.5 min

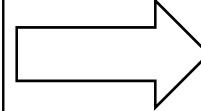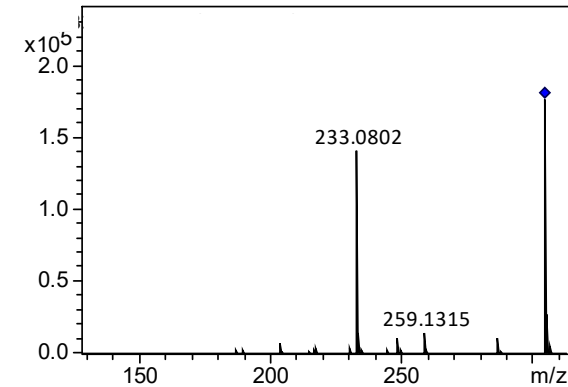

LC-MS/MS  
of 305.13  
at 16.5 min

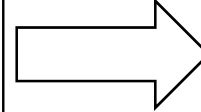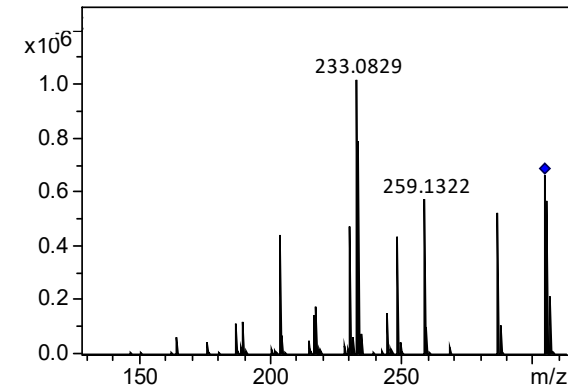

NPRL 2148

[M+H]<sup>+</sup> : 301.14

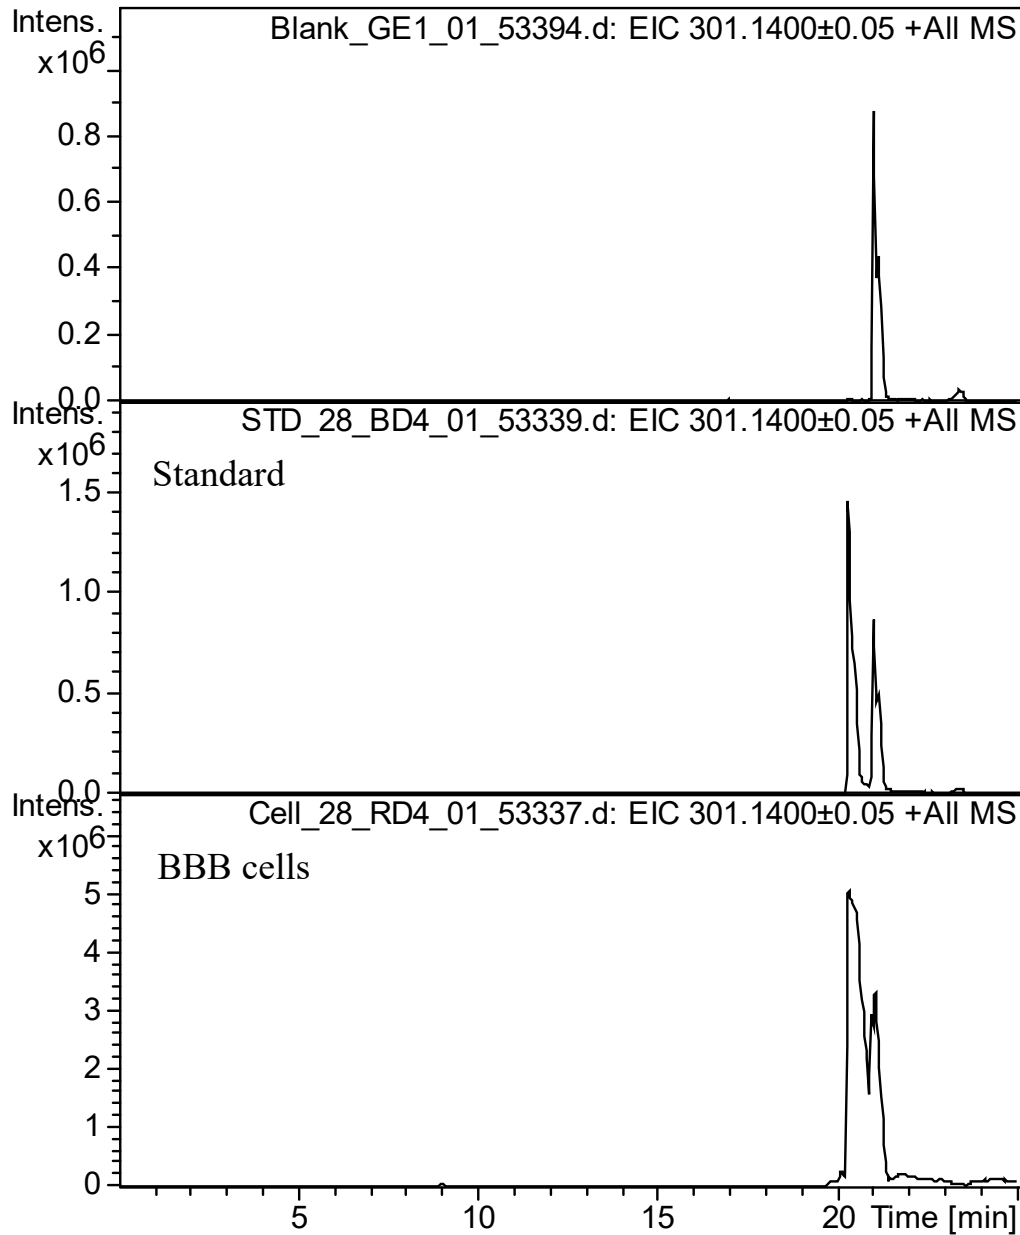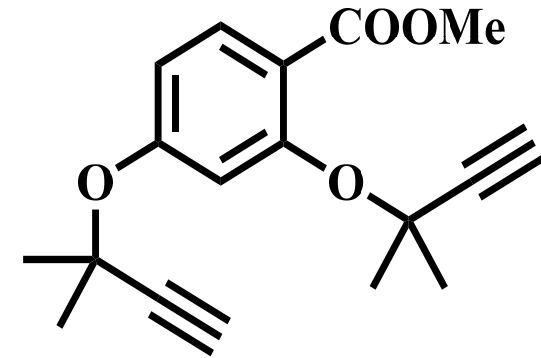

LC-MS/MS  
of 301.14  
at 20.4 min

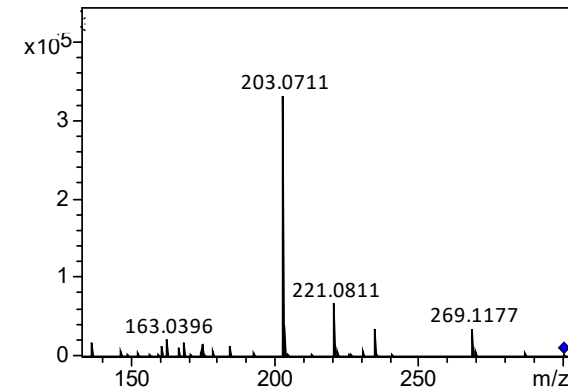

LC-MS/MS  
of 301.14  
at 20.4 min

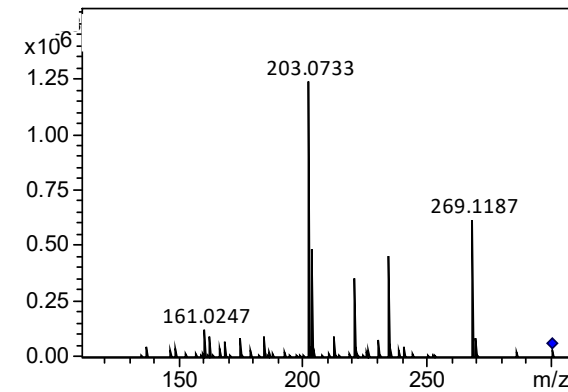

NPRL 3767

$[M+H]^+$  : 271.06

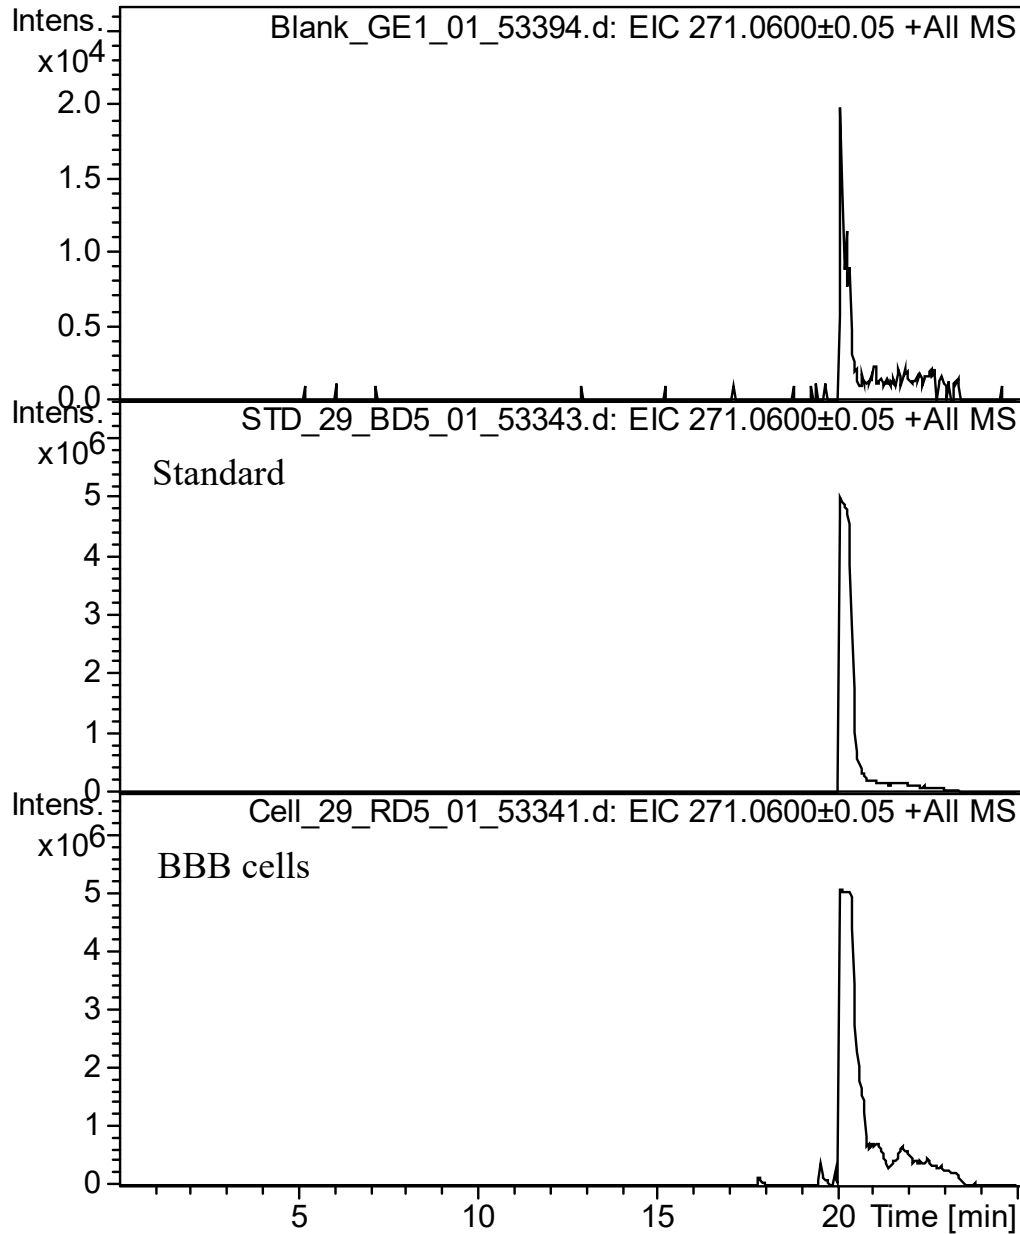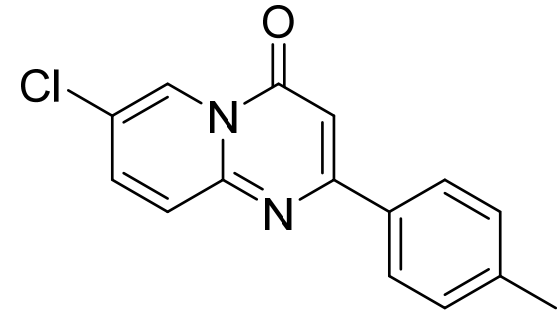

LC-MS/MS  
of 271.06  
at 20.2 min

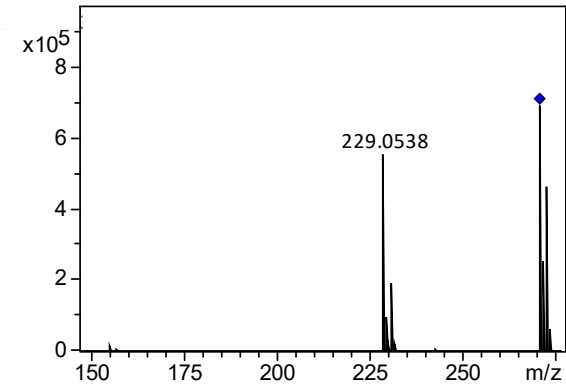

LC-MS/MS  
of 271.06  
at 20.2 min

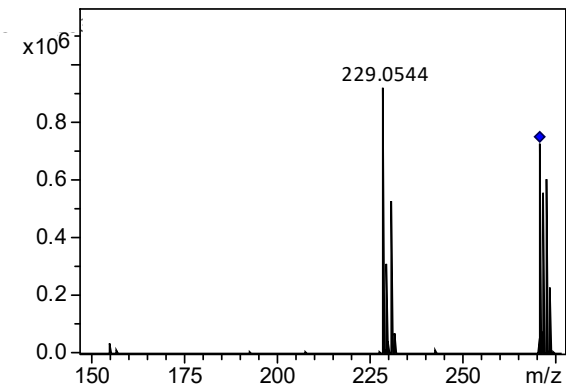





NPRL 2576

$[M+H]^+$  : 796.48

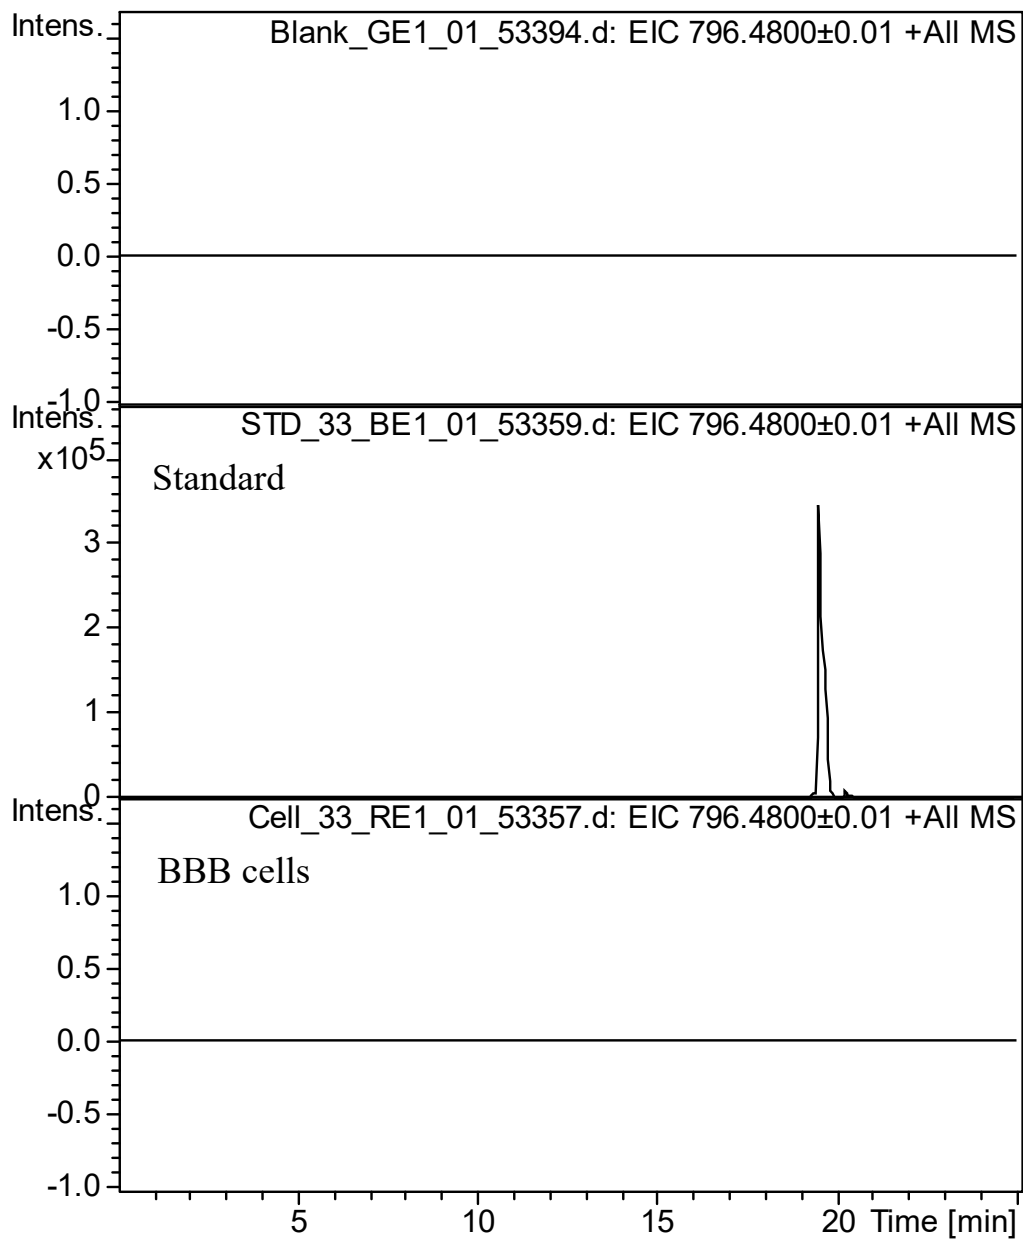

LC-MS/MS  
of 796.48  
at 19.5 min

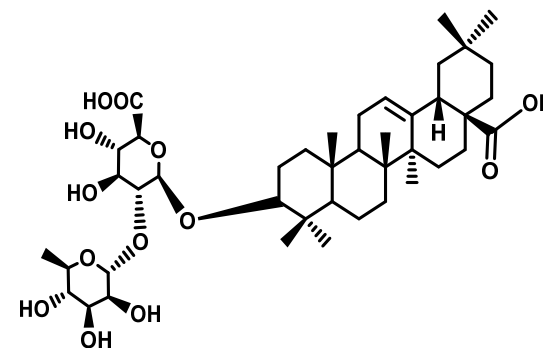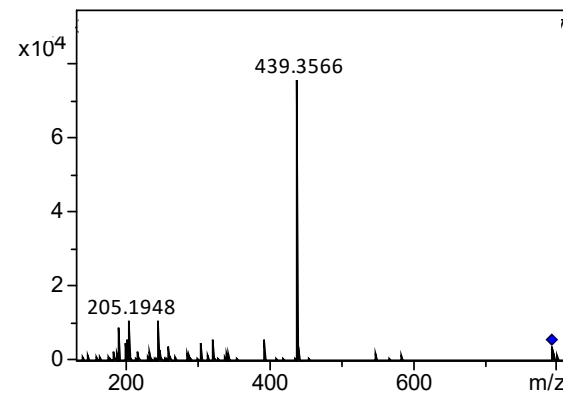

NPRL 2646

$[M+H]^+$  : 741.22

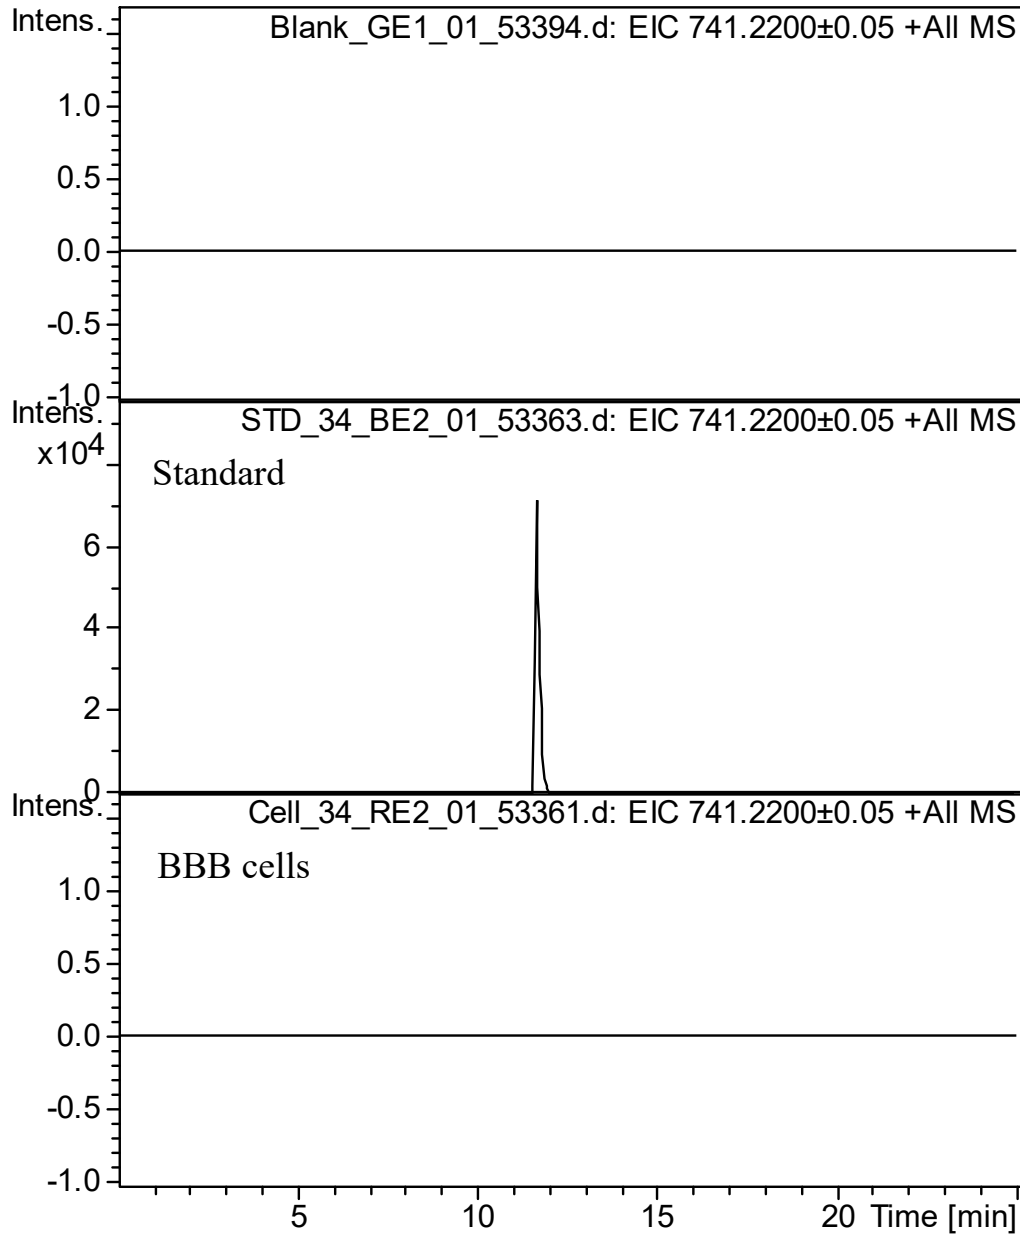

LC-MS/MS  
of 741.22  
at 11.7 min

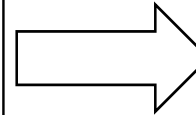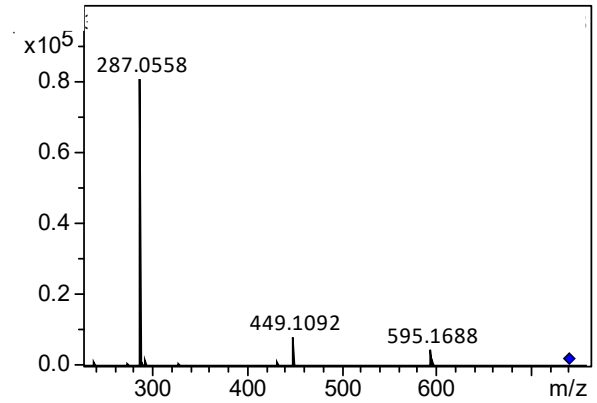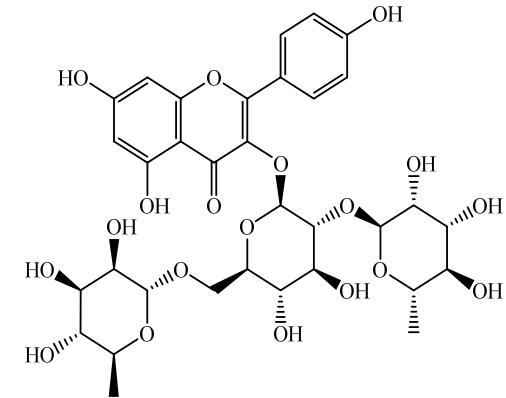

NPRL 3098

[M+H]<sup>+</sup> : 765.47

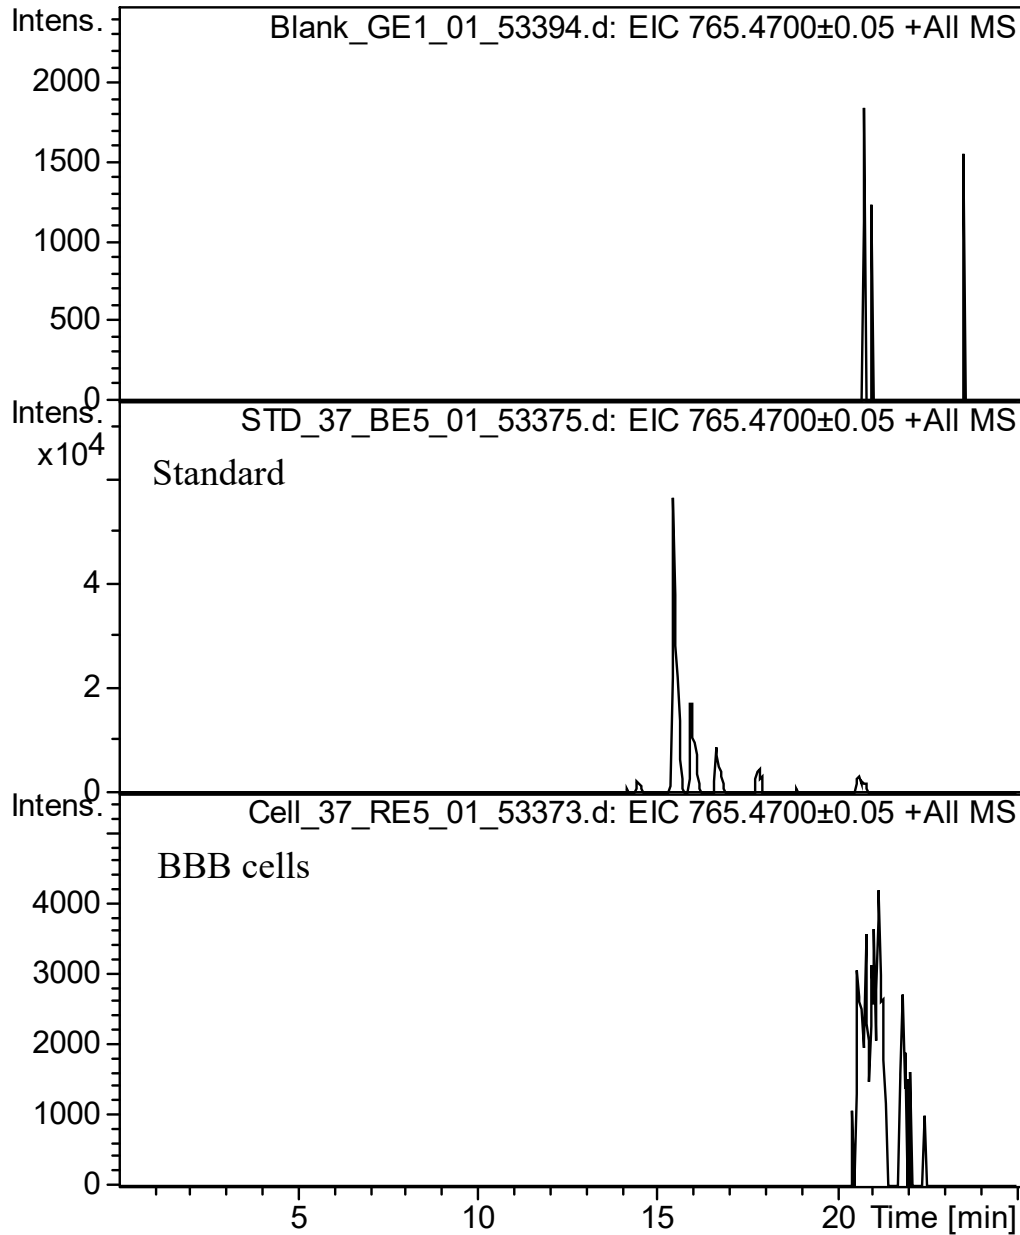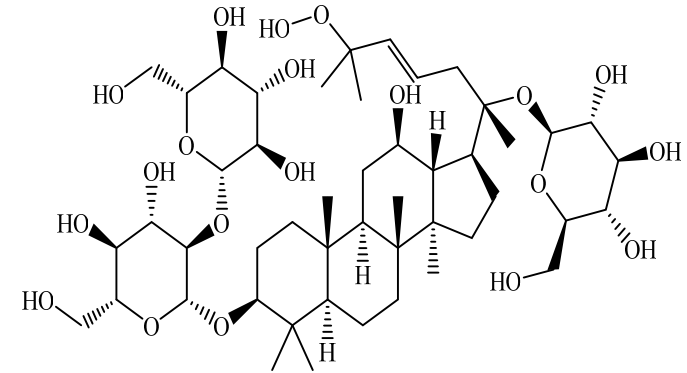

LC-MS/MS  
of 765.47  
at 15.5 min

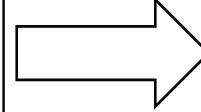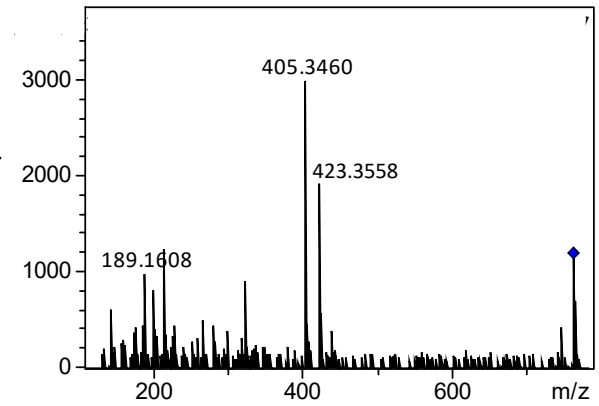

NPRL 3183

[M+H]<sup>+</sup> : 493.09

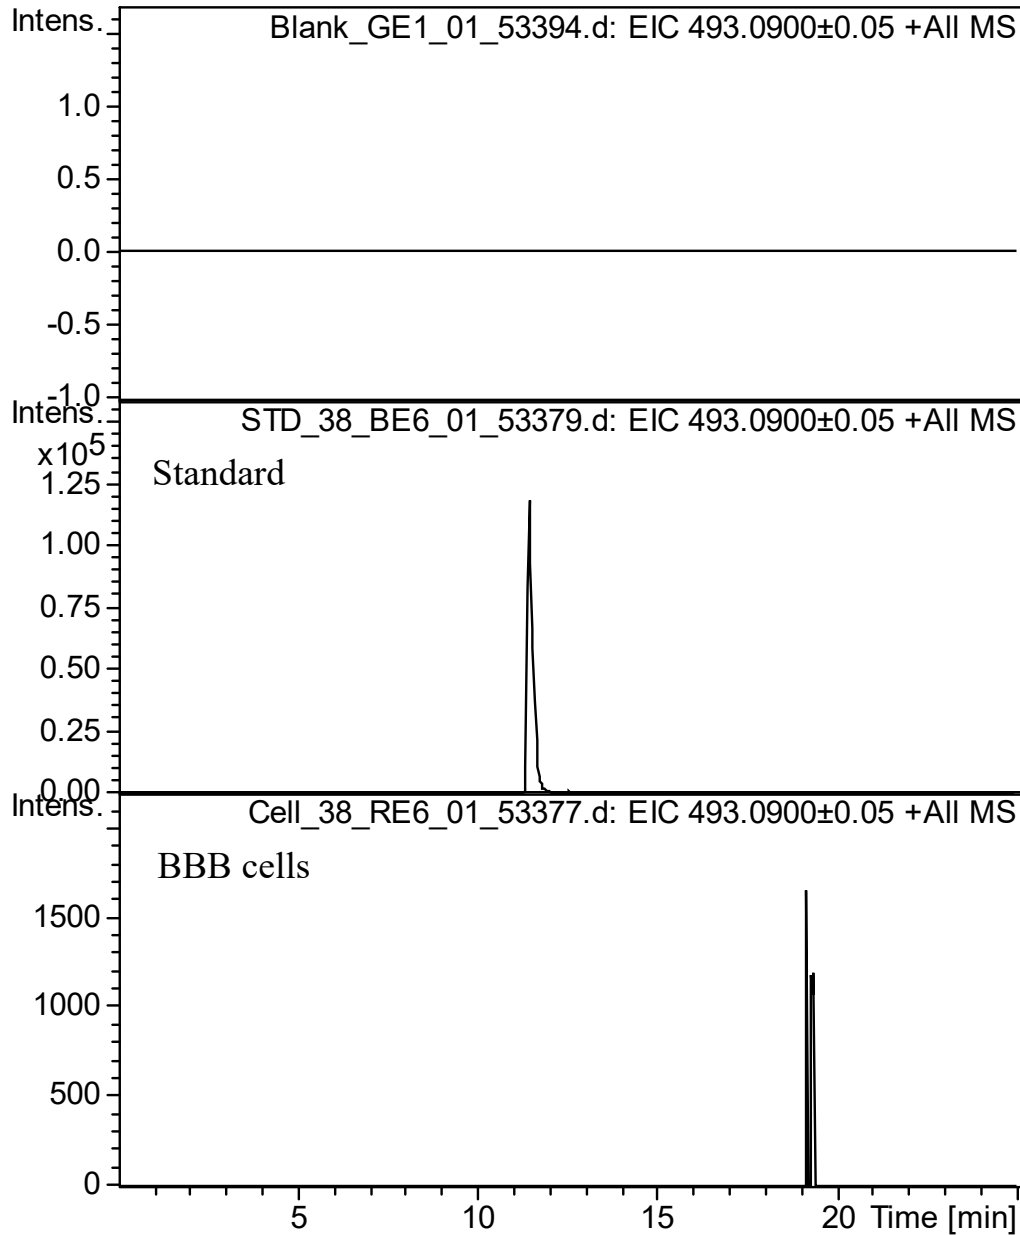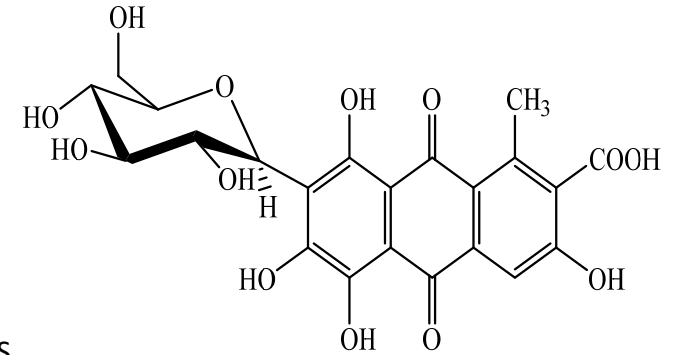

LC-MS/MS  
of 493.09  
at 11.4 min

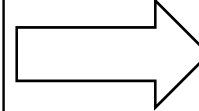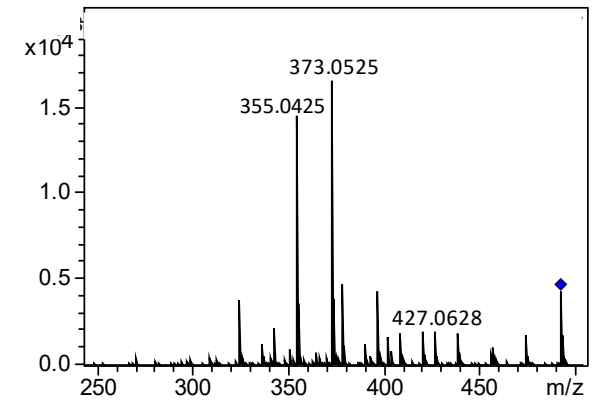

**Supplementary Table S1:** Training with CMUH-NPRL dataset.

| Training sample    | Parameter | MegaMolBART-XSMALL  | MegaMolBART- SMALL  | MegaMolBART- LARGE  |
|--------------------|-----------|---------------------|---------------------|---------------------|
| CMUH-NPRL test set | Accuracy  | 0.99 (Incorrect: 6) | 0.99 (Incorrect: 4) | 0.99 (Incorrect: 3) |
|                    | AUC       | 0.89                | 0.91                | 0.92                |
|                    | F1 score  | 0.99                | 0.99                | 0.99                |
| B3DB dataset       | Accuracy  | 0.61                | 0.57                | 0.60                |
|                    | AUC       | 0.57                | 0.56                | 0.58                |
|                    | F1 score  | 0.59                | 0.57                | 0.54                |

Accuracy:  $TP/Total$ ; AUC:  $TPR=TP/(TP+FN)$ ;  $FPR=FP/(FP+TN)$ ; F1 score:  $2/(1/Precision+1/Recall)$ ; Precision:  $TP/(TP+FP)$ ; Recall:

$TP/(TP+FN)$

**Supplementary Table S2:** Training with B3DB Dataset.

| Training sample   | B3DB Test Set | MegaMolBART-XSMALL | MegaMolBART-SMALL | MegaMolBART-LARGE |
|-------------------|---------------|--------------------|-------------------|-------------------|
| B3DB test set     | Accuracy      | 0.62               | 0.62              | 0.63              |
|                   | AUC           | 0.63               | 0.62              | 0.64              |
|                   | F1 score      | 0.62               | 0.62              | 0.62              |
| CMUH-NPRL dataset | Accuracy      | 0.11               | 0.35              | 0.35              |
|                   | AUC           | 0.58               | 0.62              | 0.62              |
|                   | F1 score      | 0.11               | 0.47              | 0.47              |

Accuracy:  $TP/Total$ ; AUC:  $TPR=TP/(TP+FN)$ ,  $FPR=FP/(FP+TN)$ ; F1 score:  $2/(1/Precision+1/Recall)$ ; Precision:  $TP/(TP+FP)$ ; Recall:

$TP/(TP+FN)$

**Supplementary Table S3:** LightBBB v.s. our model on the LightBBB dataset.

|           | AUC  | Specificity | Sensitivity | Accuracy |
|-----------|------|-------------|-------------|----------|
| LightBBB  | 0.94 | 0.77        | 0.99        | 89%      |
| Our Model | 0.93 | 0.65        | 0.97        | 90%      |

**Supplementary Table S4: DeePred v.s. our model on the DeePred dataset.**

|           | AUC  | F1-score |
|-----------|------|----------|
| DeePred   | 0.99 | 0.99     |
| Our Model | 0.96 | 0.95     |



**Supplementary Table S5: Raw data of MegaMolBART analysis on blood brain barrier (BBB) permeability of NPRL compounds.**

| <b>NPRL ID</b> | <b>PRED_SCORES</b> | <b>PRED_LABEL</b> |
|----------------|--------------------|-------------------|
| NPRL 1         | 0.45393            | BBB-              |
| NPRL 10        | 0.26538            | BBB-              |
| NPRL 104       | 0.90741            | BBB+              |
| NPRL 105       | 0.94339            | BBB+              |
| NPRL 106       | 0.89884            | BBB+              |
| NPRL 107       | 0.39566            | BBB-              |
| NPRL 108       | 0.64440            | BBB+              |
| NPRL 109       | 0.88389            | BBB+              |
| NPRL 11        | 0.63237            | BBB+              |
| NPRL 111       | 0.25134            | BBB-              |
| NPRL 112       | 0.29219            | BBB-              |
| NPRL 113       | 0.72508            | BBB+              |
| NPRL 114       | 0.90522            | BBB+              |
| NPRL 115       | 0.00139            | BBB-              |
| NPRL 116       | 0.30958            | BBB-              |
| NPRL 117       | 0.20910            | BBB-              |
| NPRL 118       | 0.02755            | BBB-              |
| NPRL 119       | 0.06277            | BBB-              |
| NPRL 12        | 0.40601            | BBB-              |
| NPRL 120       | 0.19995            | BBB-              |
| NPRL 121       | 0.00617            | BBB-              |
| NPRL 122       | 0.70562            | BBB+              |
| NPRL 124       | 0.01115            | BBB-              |
| NPRL 125       | 0.00152            | BBB-              |
| NPRL 126       | 0.00155            | BBB-              |
| NPRL 127       | 0.00528            | BBB-              |
| NPRL 128       | 0.00148            | BBB-              |
| NPRL 129       | 0.80271            | BBB+              |
| NPRL 13        | 0.01433            | BBB-              |
| NPRL 130       | 0.47620            | BBB-              |
| NPRL 131       | 0.79631            | BBB+              |
| NPRL 133       | 0.89034            | BBB+              |
| NPRL 134       | 0.40152            | BBB-              |
| NPRL 135       | 0.97464            | BBB+              |
| NPRL 136       | 0.94924            | BBB+              |
| NPRL 137       | 0.95735            | BBB+              |
| NPRL 139       | 0.84235            | BBB+              |
| NPRL 14        | 0.00227            | BBB-              |
| NPRL 140       | 0.99775            | BBB+              |
| NPRL 141       | 0.37611            | BBB-              |
| NPRL 142       | 0.99170            | BBB+              |
| NPRL 145       | 0.93260            | BBB+              |
| NPRL 146       | 0.94191            | BBB+              |
| NPRL 149       | 0.98268            | BBB+              |
| NPRL 15        | 0.00250            | BBB-              |
| NPRL 150       | 0.31763            | BBB-              |
| NPRL 151       | 0.99560            | BBB+              |
| NPRL 152       | 0.95973            | BBB+              |
| NPRL 153       | 0.99286            | BBB+              |
| NPRL 154       | 0.96706            | BBB+              |
| NPRL 155       | 0.99093            | BBB+              |
| NPRL 156       | 0.43547            | BBB-              |
| NPRL 157       | 0.28566            | BBB-              |
| NPRL 158       | 0.99878            | BBB+              |
| NPRL 159       | 0.99036            | BBB+              |

|           |         |      |
|-----------|---------|------|
| NPRL 16   | 0.82473 | BBB+ |
| NPRL 164  | 0.99415 | BBB+ |
| NPRL 165  | 0.39210 | BBB- |
| NPRL 166  | 0.97431 | BBB+ |
| NPRL 168  | 0.02276 | BBB- |
| NPRL 169  | 0.98003 | BBB+ |
| NPRL 17   | 0.99567 | BBB+ |
| NPRL 170  | 0.98367 | BBB+ |
| NPRL 171  | 0.65060 | BBB+ |
| NPRL 172  | 0.99605 | BBB+ |
| NPRL 173  | 0.96740 | BBB+ |
| NPRL 174  | 0.89727 | BBB+ |
| NPRL 175  | 0.02776 | BBB- |
| NPRL 177  | 0.99237 | BBB+ |
| NPRL 178  | 0.53367 | BBB+ |
| NPRL 179  | 0.93865 | BBB+ |
| NPRL 18   | 0.93237 | BBB+ |
| NPRL 180  | 0.80135 | BBB+ |
| NPRL 181  | 0.48458 | BBB- |
| NPRL 1814 | 0.00105 | BBB- |
| NPRL 1816 | 0.00040 | BBB- |
| NPRL 1817 | 0.00032 | BBB- |
| NPRL 1818 | 0.00041 | BBB- |
| NPRL 1819 | 0.00030 | BBB- |
| NPRL 182  | 0.99436 | BBB+ |
| NPRL 1820 | 0.00104 | BBB- |
| NPRL 1821 | 0.01710 | BBB- |
| NPRL 1822 | 0.50921 | BBB+ |
| NPRL 1823 | 0.85355 | BBB+ |
| NPRL 1825 | 0.49881 | BBB- |
| NPRL 1826 | 0.93773 | BBB+ |
| NPRL 1827 | 0.00196 | BBB- |
| NPRL 1828 | 0.60257 | BBB+ |
| NPRL 1829 | 0.81099 | BBB+ |
| NPRL 1830 | 0.27776 | BBB- |
| NPRL 1831 | 0.11780 | BBB- |
| NPRL 1833 | 0.01201 | BBB- |
| NPRL 1834 | 0.00033 | BBB- |
| NPRL 1835 | 0.79119 | BBB+ |
| NPRL 1836 | 0.98740 | BBB+ |
| NPRL 1837 | 0.89497 | BBB+ |
| NPRL 1838 | 0.24268 | BBB- |
| NPRL 1839 | 0.00017 | BBB- |
| NPRL 184  | 0.49445 | BBB- |
| NPRL 1840 | 0.34009 | BBB- |
| NPRL 1841 | 0.00160 | BBB- |
| NPRL 1842 | 0.26273 | BBB- |
| NPRL 1843 | 0.55278 | BBB+ |
| NPRL 1844 | 0.03153 | BBB- |
| NPRL 1847 | 0.47701 | BBB- |
| NPRL 1848 | 0.47869 | BBB- |
| NPRL 1849 | 0.95075 | BBB+ |
| NPRL 185  | 0.99394 | BBB+ |
| NPRL 1850 | 0.47368 | BBB- |
| NPRL 1851 | 0.71548 | BBB+ |
| NPRL 1852 | 0.01299 | BBB- |
| NPRL 1854 | 0.04629 | BBB- |

|           |         |      |
|-----------|---------|------|
| NPRL 1855 | 0.04217 | BBB- |
| NPRL 1857 | 0.94250 | BBB+ |
| NPRL 1859 | 0.07863 | BBB- |
| NPRL 186  | 0.98057 | BBB+ |
| NPRL 1860 | 0.67976 | BBB+ |
| NPRL 1862 | 0.00942 | BBB- |
| NPRL 1863 | 0.00601 | BBB- |
| NPRL 1864 | 0.00476 | BBB- |
| NPRL 1866 | 0.01774 | BBB- |
| NPRL 1867 | 0.00158 | BBB- |
| NPRL 1868 | 0.00143 | BBB- |
| NPRL 1869 | 0.00260 | BBB- |
| NPRL 187  | 0.04818 | BBB- |
| NPRL 1870 | 0.00270 | BBB- |
| NPRL 1871 | 0.01230 | BBB- |
| NPRL 1873 | 0.97580 | BBB+ |
| NPRL 1874 | 0.96846 | BBB+ |
| NPRL 1875 | 0.37278 | BBB- |
| NPRL 1876 | 0.81821 | BBB+ |
| NPRL 1878 | 0.99679 | BBB+ |
| NPRL 188  | 0.45436 | BBB- |
| NPRL 1880 | 0.92575 | BBB+ |
| NPRL 1881 | 0.90539 | BBB+ |
| NPRL 1882 | 0.71176 | BBB+ |
| NPRL 1883 | 0.98567 | BBB+ |
| NPRL 1884 | 0.09728 | BBB- |
| NPRL 1885 | 0.96612 | BBB+ |
| NPRL 1886 | 0.94736 | BBB+ |
| NPRL 1887 | 0.11249 | BBB- |
| NPRL 1888 | 0.96522 | BBB+ |
| NPRL 1889 | 0.97478 | BBB+ |
| NPRL 189  | 0.31078 | BBB- |
| NPRL 1890 | 0.81021 | BBB+ |
| NPRL 1891 | 0.99305 | BBB+ |
| NPRL 1892 | 0.99088 | BBB+ |
| NPRL 1893 | 0.99025 | BBB+ |
| NPRL 1894 | 0.99385 | BBB+ |
| NPRL 1895 | 0.99859 | BBB+ |
| NPRL 1896 | 0.98566 | BBB+ |
| NPRL 1897 | 0.98787 | BBB+ |
| NPRL 1898 | 0.98640 | BBB+ |
| NPRL 1899 | 0.96279 | BBB+ |
| NPRL 19   | 0.08060 | BBB- |
| NPRL 190  | 0.43166 | BBB- |
| NPRL 1900 | 0.99044 | BBB+ |
| NPRL 1901 | 0.99628 | BBB+ |
| NPRL 1902 | 0.99128 | BBB+ |
| NPRL 1903 | 0.99820 | BBB+ |
| NPRL 1904 | 0.93922 | BBB+ |
| NPRL 1905 | 0.98250 | BBB+ |
| NPRL 1906 | 0.99374 | BBB+ |
| NPRL 1907 | 0.95452 | BBB+ |
| NPRL 1908 | 0.95867 | BBB+ |
| NPRL 1909 | 0.47885 | BBB- |
| NPRL 191  | 0.74680 | BBB+ |
| NPRL 1910 | 0.99244 | BBB+ |
| NPRL 1911 | 0.98503 | BBB+ |

|           |         |      |
|-----------|---------|------|
| NPRL 1912 | 0.99085 | BBB+ |
| NPRL 1913 | 0.97538 | BBB+ |
| NPRL 1914 | 0.85892 | BBB+ |
| NPRL 1915 | 0.92179 | BBB+ |
| NPRL 1919 | 0.94039 | BBB+ |
| NPRL 1920 | 0.93215 | BBB+ |
| NPRL 1921 | 0.93499 | BBB+ |
| NPRL 1922 | 0.93369 | BBB+ |
| NPRL 1923 | 0.98308 | BBB+ |
| NPRL 1924 | 0.88542 | BBB+ |
| NPRL 1925 | 0.86756 | BBB+ |
| NPRL 1926 | 0.90962 | BBB+ |
| NPRL 1927 | 0.96695 | BBB+ |
| NPRL 1929 | 0.98297 | BBB+ |
| NPRL 193  | 0.90590 | BBB+ |
| NPRL 1932 | 0.89355 | BBB+ |
| NPRL 1933 | 0.90590 | BBB+ |
| NPRL 1935 | 0.82961 | BBB+ |
| NPRL 1936 | 0.78987 | BBB+ |
| NPRL 1937 | 0.99099 | BBB+ |
| NPRL 1938 | 0.76048 | BBB+ |
| NPRL 1939 | 0.78055 | BBB+ |
| NPRL 194  | 0.61286 | BBB+ |
| NPRL 1940 | 0.76889 | BBB+ |
| NPRL 1941 | 0.26338 | BBB- |
| NPRL 1942 | 0.63785 | BBB+ |
| NPRL 1943 | 0.95100 | BBB+ |
| NPRL 1944 | 0.48932 | BBB- |
| NPRL 1946 | 0.99025 | BBB+ |
| NPRL 1947 | 0.84046 | BBB+ |
| NPRL 1948 | 0.45773 | BBB- |
| NPRL 1949 | 0.87120 | BBB+ |
| NPRL 195  | 0.99112 | BBB+ |
| NPRL 1950 | 0.99785 | BBB+ |
| NPRL 1951 | 0.77047 | BBB+ |
| NPRL 1952 | 0.97738 | BBB+ |
| NPRL 1953 | 0.91440 | BBB+ |
| NPRL 1954 | 0.60857 | BBB+ |
| NPRL 1955 | 0.98373 | BBB+ |
| NPRL 1956 | 0.94809 | BBB+ |
| NPRL 1957 | 0.99494 | BBB+ |
| NPRL 1958 | 0.99821 | BBB+ |
| NPRL 1959 | 0.99704 | BBB+ |
| NPRL 196  | 0.14981 | BBB- |
| NPRL 1960 | 0.99915 | BBB+ |
| NPRL 1961 | 0.99712 | BBB+ |
| NPRL 1962 | 0.92111 | BBB+ |
| NPRL 1963 | 0.96813 | BBB+ |
| NPRL 1964 | 0.98849 | BBB+ |
| NPRL 1965 | 0.99620 | BBB+ |
| NPRL 1966 | 0.98964 | BBB+ |
| NPRL 1967 | 0.99495 | BBB+ |
| NPRL 1968 | 0.99873 | BBB+ |
| NPRL 1969 | 0.28499 | BBB- |
| NPRL 197  | 0.91230 | BBB+ |
| NPRL 1970 | 0.91184 | BBB+ |
| NPRL 1971 | 0.96584 | BBB+ |

|           |         |      |
|-----------|---------|------|
| NPRL 1972 | 0.97788 | BBB+ |
| NPRL 1973 | 0.29363 | BBB- |
| NPRL 1974 | 0.32816 | BBB- |
| NPRL 1975 | 0.42572 | BBB- |
| NPRL 1976 | 0.71959 | BBB+ |
| NPRL 1977 | 0.00026 | BBB- |
| NPRL 1979 | 0.84527 | BBB+ |
| NPRL 1980 | 0.81497 | BBB+ |
| NPRL 1981 | 0.49912 | BBB- |
| NPRL 1982 | 0.00051 | BBB- |
| NPRL 1983 | 0.97692 | BBB+ |
| NPRL 1984 | 0.99155 | BBB+ |
| NPRL 1985 | 0.90969 | BBB+ |
| NPRL 1986 | 0.85231 | BBB+ |
| NPRL 1987 | 0.05821 | BBB- |
| NPRL 1988 | 0.00699 | BBB- |
| NPRL 1989 | 0.00765 | BBB- |
| NPRL 199  | 0.14140 | BBB- |
| NPRL 1990 | 0.00196 | BBB- |
| NPRL 1991 | 0.00270 | BBB- |
| NPRL 1992 | 0.00059 | BBB- |
| NPRL 1993 | 0.00766 | BBB- |
| NPRL 1994 | 0.00554 | BBB- |
| NPRL 1995 | 0.01046 | BBB- |
| NPRL 1996 | 0.43470 | BBB- |
| NPRL 1997 | 0.05094 | BBB- |
| NPRL 1998 | 0.05070 | BBB- |
| NPRL 2    | 0.97381 | BBB+ |
| NPRL 20   | 0.36651 | BBB- |
| NPRL 2001 | 0.07590 | BBB- |
| NPRL 2002 | 0.93535 | BBB+ |
| NPRL 2003 | 0.38807 | BBB- |
| NPRL 2004 | 0.77195 | BBB+ |
| NPRL 2005 | 0.99639 | BBB+ |
| NPRL 2006 | 0.92663 | BBB+ |
| NPRL 2007 | 0.99929 | BBB+ |
| NPRL 2008 | 0.75623 | BBB+ |
| NPRL 2009 | 0.99465 | BBB+ |
| NPRL 201  | 0.99079 | BBB+ |
| NPRL 2010 | 0.97569 | BBB+ |
| NPRL 2011 | 0.99811 | BBB+ |
| NPRL 2014 | 0.89672 | BBB+ |
| NPRL 2015 | 0.45737 | BBB- |
| NPRL 2016 | 0.01329 | BBB- |
| NPRL 2017 | 0.12955 | BBB- |
| NPRL 2018 | 0.04264 | BBB- |
| NPRL 2019 | 0.02097 | BBB- |
| NPRL 202  | 0.00588 | BBB- |
| NPRL 2020 | 0.00726 | BBB- |
| NPRL 2021 | 0.00058 | BBB- |
| NPRL 2023 | 0.68606 | BBB+ |
| NPRL 2025 | 0.97090 | BBB+ |
| NPRL 2026 | 0.99583 | BBB+ |
| NPRL 2027 | 0.98770 | BBB+ |
| NPRL 2028 | 0.99260 | BBB+ |
| NPRL 2029 | 0.99832 | BBB+ |
| NPRL 203  | 0.08528 | BBB- |

|           |         |      |
|-----------|---------|------|
| NPRL 2032 | 0.60327 | BBB+ |
| NPRL 2033 | 0.55846 | BBB+ |
| NPRL 2034 | 0.85131 | BBB+ |
| NPRL 2037 | 0.89930 | BBB+ |
| NPRL 2038 | 0.95744 | BBB+ |
| NPRL 2039 | 0.99683 | BBB+ |
| NPRL 204  | 0.61273 | BBB+ |
| NPRL 2042 | 0.82845 | BBB+ |
| NPRL 2043 | 0.89831 | BBB+ |
| NPRL 2049 | 0.08297 | BBB- |
| NPRL 205  | 0.94949 | BBB+ |
| NPRL 2050 | 0.97965 | BBB+ |
| NPRL 2051 | 0.99571 | BBB+ |
| NPRL 2052 | 0.61317 | BBB+ |
| NPRL 2054 | 0.87756 | BBB+ |
| NPRL 2055 | 0.97930 | BBB+ |
| NPRL 2056 | 0.94031 | BBB+ |
| NPRL 2057 | 0.89095 | BBB+ |
| NPRL 2058 | 0.96087 | BBB+ |
| NPRL 2059 | 0.99636 | BBB+ |
| NPRL 206  | 0.83441 | BBB+ |
| NPRL 2061 | 0.96044 | BBB+ |
| NPRL 2062 | 0.96433 | BBB+ |
| NPRL 2065 | 0.22042 | BBB- |
| NPRL 2066 | 0.97673 | BBB+ |
| NPRL 2067 | 0.97403 | BBB+ |
| NPRL 2068 | 0.09509 | BBB- |
| NPRL 2069 | 0.91547 | BBB+ |
| NPRL 207  | 0.86265 | BBB+ |
| NPRL 2070 | 0.85740 | BBB+ |
| NPRL 2071 | 0.99415 | BBB+ |
| NPRL 2072 | 0.93342 | BBB+ |
| NPRL 2073 | 0.98040 | BBB+ |
| NPRL 2074 | 0.59798 | BBB+ |
| NPRL 2076 | 0.95042 | BBB+ |
| NPRL 2077 | 0.99547 | BBB+ |
| NPRL 2078 | 0.95717 | BBB+ |
| NPRL 2079 | 0.99680 | BBB+ |
| NPRL 208  | 0.00442 | BBB- |
| NPRL 2080 | 0.99906 | BBB+ |
| NPRL 2083 | 0.99567 | BBB+ |
| NPRL 2085 | 0.57285 | BBB+ |
| NPRL 2086 | 0.40926 | BBB- |
| NPRL 2088 | 0.86612 | BBB+ |
| NPRL 2089 | 0.95812 | BBB+ |
| NPRL 209  | 0.01478 | BBB- |
| NPRL 2090 | 0.95429 | BBB+ |
| NPRL 2091 | 0.55268 | BBB+ |
| NPRL 2092 | 0.52262 | BBB+ |
| NPRL 2093 | 0.99677 | BBB+ |
| NPRL 2096 | 0.79407 | BBB+ |
| NPRL 2097 | 0.96497 | BBB+ |
| NPRL 2098 | 0.91691 | BBB+ |
| NPRL 2099 | 0.99574 | BBB+ |
| NPRL 21   | 0.59550 | BBB+ |
| NPRL 210  | 0.00596 | BBB- |
| NPRL 2100 | 0.97602 | BBB+ |

|           |         |      |
|-----------|---------|------|
| NPRL 2101 | 0.93755 | BBB+ |
| NPRL 2102 | 0.75019 | BBB+ |
| NPRL 2103 | 0.88266 | BBB+ |
| NPRL 2105 | 0.98448 | BBB+ |
| NPRL 211  | 0.97950 | BBB+ |
| NPRL 2112 | 0.22356 | BBB- |
| NPRL 2113 | 0.64917 | BBB+ |
| NPRL 2114 | 0.03297 | BBB- |
| NPRL 2115 | 0.49949 | BBB- |
| NPRL 2116 | 0.00410 | BBB- |
| NPRL 2117 | 0.16693 | BBB- |
| NPRL 2118 | 0.00927 | BBB- |
| NPRL 2119 | 0.50342 | BBB+ |
| NPRL 212  | 0.83444 | BBB+ |
| NPRL 2120 | 0.48277 | BBB- |
| NPRL 2121 | 0.60202 | BBB+ |
| NPRL 2122 | 0.67869 | BBB+ |
| NPRL 2123 | 0.79036 | BBB+ |
| NPRL 2124 | 0.00108 | BBB- |
| NPRL 2125 | 0.00060 | BBB- |
| NPRL 2127 | 0.98529 | BBB+ |
| NPRL 2128 | 0.92299 | BBB+ |
| NPRL 2129 | 0.99212 | BBB+ |
| NPRL 213  | 0.00110 | BBB- |
| NPRL 2130 | 0.99662 | BBB+ |
| NPRL 2131 | 0.19914 | BBB- |
| NPRL 2132 | 0.10321 | BBB- |
| NPRL 2134 | 0.56425 | BBB+ |
| NPRL 2135 | 0.76088 | BBB+ |
| NPRL 2137 | 0.91147 | BBB+ |
| NPRL 2139 | 0.97641 | BBB+ |
| NPRL 214  | 0.00009 | BBB- |
| NPRL 2140 | 0.15799 | BBB- |
| NPRL 2144 | 0.00326 | BBB- |
| NPRL 2145 | 0.47840 | BBB- |
| NPRL 2146 | 0.98342 | BBB+ |
| NPRL 2147 | 0.80111 | BBB+ |
| NPRL 2148 | 0.99787 | BBB+ |
| NPRL 2149 | 0.42259 | BBB- |
| NPRL 215  | 0.01428 | BBB- |
| NPRL 2150 | 0.98785 | BBB+ |
| NPRL 2151 | 0.98989 | BBB+ |
| NPRL 2153 | 0.60756 | BBB+ |
| NPRL 2154 | 0.71722 | BBB+ |
| NPRL 2155 | 0.77251 | BBB+ |
| NPRL 2156 | 0.92534 | BBB+ |
| NPRL 2158 | 0.98171 | BBB+ |
| NPRL 216  | 0.01259 | BBB- |
| NPRL 217  | 0.98146 | BBB+ |
| NPRL 2170 | 0.00119 | BBB- |
| NPRL 2171 | 0.19386 | BBB- |
| NPRL 2172 | 0.50270 | BBB+ |
| NPRL 2173 | 0.33111 | BBB- |
| NPRL 2174 | 0.51110 | BBB+ |
| NPRL 2175 | 0.22120 | BBB- |
| NPRL 2176 | 0.03131 | BBB- |
| NPRL 2177 | 0.04727 | BBB- |

|           |         |      |
|-----------|---------|------|
| NPRL 2178 | 0.18363 | BBB- |
| NPRL 2179 | 0.02676 | BBB- |
| NPRL 218  | 0.90551 | BBB+ |
| NPRL 2180 | 0.11420 | BBB- |
| NPRL 2181 | 0.00247 | BBB- |
| NPRL 2182 | 0.00575 | BBB- |
| NPRL 2183 | 0.20019 | BBB- |
| NPRL 2184 | 0.38864 | BBB- |
| NPRL 2185 | 0.02072 | BBB- |
| NPRL 2186 | 0.17678 | BBB- |
| NPRL 2187 | 0.00008 | BBB- |
| NPRL 2188 | 0.97715 | BBB+ |
| NPRL 2189 | 0.95454 | BBB+ |
| NPRL 219  | 0.57653 | BBB+ |
| NPRL 2190 | 0.17937 | BBB- |
| NPRL 2191 | 0.88226 | BBB+ |
| NPRL 2192 | 0.83793 | BBB+ |
| NPRL 2193 | 0.03838 | BBB- |
| NPRL 2194 | 0.94541 | BBB+ |
| NPRL 2195 | 0.99362 | BBB+ |
| NPRL 2196 | 0.98876 | BBB+ |
| NPRL 2197 | 0.99034 | BBB+ |
| NPRL 2198 | 0.98557 | BBB+ |
| NPRL 2199 | 0.98241 | BBB+ |
| NPRL 22   | 0.04968 | BBB- |
| NPRL 220  | 0.51481 | BBB+ |
| NPRL 2200 | 0.99623 | BBB+ |
| NPRL 2201 | 0.78525 | BBB+ |
| NPRL 2202 | 0.82007 | BBB+ |
| NPRL 2203 | 0.99024 | BBB+ |
| NPRL 2204 | 0.99941 | BBB+ |
| NPRL 2205 | 0.99691 | BBB+ |
| NPRL 2206 | 0.92778 | BBB+ |
| NPRL 2207 | 0.41614 | BBB- |
| NPRL 221  | 0.99580 | BBB+ |
| NPRL 222  | 0.00389 | BBB- |
| NPRL 223  | 0.00066 | BBB- |
| NPRL 225  | 0.00309 | BBB- |
| NPRL 227  | 0.00052 | BBB- |
| NPRL 228  | 0.00617 | BBB- |
| NPRL 230  | 0.00357 | BBB- |
| NPRL 231  | 0.00242 | BBB- |
| NPRL 232  | 0.00061 | BBB- |
| NPRL 235  | 0.00132 | BBB- |
| NPRL 237  | 0.96865 | BBB+ |
| NPRL 239  | 0.00542 | BBB- |
| NPRL 24   | 0.11048 | BBB- |
| NPRL 240  | 0.00542 | BBB- |
| NPRL 242  | 0.01133 | BBB- |
| NPRL 245  | 0.01024 | BBB- |
| NPRL 246  | 0.00025 | BBB- |
| NPRL 248  | 0.00022 | BBB- |
| NPRL 249  | 0.00371 | BBB- |
| NPRL 25   | 0.75601 | BBB+ |
| NPRL 250  | 0.00038 | BBB- |
| NPRL 252  | 0.00149 | BBB- |
| NPRL 258  | 0.00699 | BBB- |



|          |         |      |
|----------|---------|------|
| NPRL 259 | 0.00185 | BBB- |
| NPRL 26  | 0.53269 | BBB+ |
| NPRL 260 | 0.93570 | BBB+ |
| NPRL 262 | 0.00279 | BBB- |
| NPRL 263 | 0.00375 | BBB- |
| NPRL 264 | 0.01467 | BBB- |
| NPRL 265 | 0.01978 | BBB- |
| NPRL 268 | 0.00034 | BBB- |
| NPRL 27  | 0.99204 | BBB+ |
| NPRL 270 | 0.02159 | BBB- |
| NPRL 271 | 0.01394 | BBB- |
| NPRL 272 | 0.85339 | BBB+ |
| NPRL 274 | 0.00291 | BBB- |
| NPRL 276 | 0.77370 | BBB+ |
| NPRL 277 | 0.77119 | BBB+ |
| NPRL 28  | 0.82767 | BBB+ |
| NPRL 281 | 0.91850 | BBB+ |
| NPRL 282 | 0.97553 | BBB+ |
| NPRL 283 | 0.98217 | BBB+ |
| NPRL 284 | 0.88698 | BBB+ |
| NPRL 285 | 0.89075 | BBB+ |
| NPRL 286 | 0.88285 | BBB+ |
| NPRL 287 | 0.64775 | BBB+ |
| NPRL 288 | 0.69933 | BBB+ |
| NPRL 289 | 0.87832 | BBB+ |
| NPRL 29  | 0.47586 | BBB- |
| NPRL 290 | 0.89342 | BBB+ |
| NPRL 291 | 0.89110 | BBB+ |
| NPRL 293 | 0.98047 | BBB+ |
| NPRL 294 | 0.71138 | BBB+ |
| NPRL 295 | 0.99321 | BBB+ |
| NPRL 296 | 0.87159 | BBB+ |
| NPRL 297 | 0.97889 | BBB+ |
| NPRL 298 | 0.39758 | BBB- |
| NPRL 299 | 0.70254 | BBB+ |
| NPRL 3   | 0.93633 | BBB+ |
| NPRL 30  | 0.69461 | BBB+ |
| NPRL 300 | 0.40719 | BBB- |
| NPRL 301 | 0.99541 | BBB+ |
| NPRL 302 | 0.96815 | BBB+ |
| NPRL 305 | 0.97494 | BBB+ |
| NPRL 306 | 0.98961 | BBB+ |
| NPRL 308 | 0.01503 | BBB- |
| NPRL 309 | 0.99522 | BBB+ |
| NPRL 31  | 0.93275 | BBB+ |
| NPRL 310 | 0.46809 | BBB- |
| NPRL 311 | 0.57357 | BBB+ |
| NPRL 313 | 0.40129 | BBB- |
| NPRL 316 | 0.02825 | BBB- |
| NPRL 318 | 0.98480 | BBB+ |
| NPRL 32  | 0.69133 | BBB+ |
| NPRL 320 | 0.27242 | BBB- |
| NPRL 322 | 0.93192 | BBB+ |
| NPRL 325 | 0.46972 | BBB- |
| NPRL 329 | 0.74687 | BBB+ |
| NPRL 331 | 0.04193 | BBB- |
| NPRL 332 | 0.26231 | BBB- |

|          |         |      |
|----------|---------|------|
| NPRL 333 | 0.00224 | BBB- |
| NPRL 334 | 0.04633 | BBB- |
| NPRL 335 | 0.81456 | BBB+ |
| NPRL 336 | 0.03190 | BBB- |
| NPRL 337 | 0.00345 | BBB- |
| NPRL 338 | 0.15844 | BBB- |
| NPRL 339 | 0.00055 | BBB- |
| NPRL 34  | 0.71068 | BBB+ |
| NPRL 340 | 0.00065 | BBB- |
| NPRL 341 | 0.25872 | BBB- |
| NPRL 342 | 0.49580 | BBB- |
| NPRL 343 | 0.36289 | BBB- |
| NPRL 344 | 0.05342 | BBB- |
| NPRL 345 | 0.19883 | BBB- |
| NPRL 346 | 0.18085 | BBB- |
| NPRL 347 | 0.04903 | BBB- |
| NPRL 348 | 0.42188 | BBB- |
| NPRL 349 | 0.04098 | BBB- |
| NPRL 35  | 0.03356 | BBB- |
| NPRL 350 | 0.12782 | BBB- |
| NPRL 351 | 0.24160 | BBB- |
| NPRL 352 | 0.37461 | BBB- |
| NPRL 353 | 0.97364 | BBB+ |
| NPRL 354 | 0.00105 | BBB- |
| NPRL 355 | 0.01176 | BBB- |
| NPRL 356 | 0.65009 | BBB+ |
| NPRL 357 | 0.85576 | BBB+ |
| NPRL 358 | 0.99815 | BBB+ |
| NPRL 359 | 0.05457 | BBB- |
| NPRL 36  | 0.96566 | BBB+ |
| NPRL 360 | 0.34855 | BBB- |
| NPRL 361 | 0.72752 | BBB+ |
| NPRL 362 | 0.00821 | BBB- |
| NPRL 363 | 0.00152 | BBB- |
| NPRL 364 | 0.20506 | BBB- |
| NPRL 365 | 0.03973 | BBB- |
| NPRL 366 | 0.03587 | BBB- |
| NPRL 367 | 0.02913 | BBB- |
| NPRL 368 | 0.16981 | BBB- |
| NPRL 369 | 0.02901 | BBB- |
| NPRL 37  | 0.52481 | BBB+ |
| NPRL 370 | 0.00015 | BBB- |
| NPRL 371 | 0.08912 | BBB- |
| NPRL 372 | 0.66676 | BBB+ |
| NPRL 373 | 0.58389 | BBB+ |
| NPRL 374 | 0.22753 | BBB- |
| NPRL 375 | 0.35442 | BBB- |
| NPRL 378 | 0.84966 | BBB+ |
| NPRL 379 | 0.70392 | BBB+ |
| NPRL 38  | 0.98147 | BBB+ |
| NPRL 380 | 0.64723 | BBB+ |
| NPRL 381 | 0.96675 | BBB+ |
| NPRL 382 | 0.00449 | BBB- |
| NPRL 383 | 0.86596 | BBB+ |
| NPRL 384 | 0.50540 | BBB+ |
| NPRL 385 | 0.74381 | BBB+ |
| NPRL 386 | 0.70066 | BBB+ |

|          |         |      |
|----------|---------|------|
| NPRL 387 | 0.45634 | BBB- |
| NPRL 388 | 0.26000 | BBB- |
| NPRL 389 | 0.52846 | BBB+ |
| NPRL 39  | 0.13512 | BBB- |
| NPRL 390 | 0.08725 | BBB- |
| NPRL 391 | 0.10522 | BBB- |
| NPRL 392 | 0.02918 | BBB- |
| NPRL 394 | 0.52993 | BBB+ |
| NPRL 395 | 0.92443 | BBB+ |
| NPRL 396 | 0.88857 | BBB+ |
| NPRL 397 | 0.40572 | BBB- |
| NPRL 398 | 0.89403 | BBB+ |
| NPRL 399 | 0.08398 | BBB- |
| NPRL 4   | 0.80067 | BBB+ |
| NPRL 40  | 0.04883 | BBB- |
| NPRL 400 | 0.07554 | BBB- |
| NPRL 401 | 0.05294 | BBB- |
| NPRL 403 | 0.02603 | BBB- |
| NPRL 404 | 0.43413 | BBB- |
| NPRL 405 | 0.82878 | BBB+ |
| NPRL 406 | 0.81804 | BBB+ |
| NPRL 407 | 0.94766 | BBB+ |
| NPRL 408 | 0.82478 | BBB+ |
| NPRL 409 | 0.75347 | BBB+ |
| NPRL 41  | 0.91799 | BBB+ |
| NPRL 410 | 0.10425 | BBB- |
| NPRL 411 | 0.04773 | BBB- |
| NPRL 413 | 0.08528 | BBB- |
| NPRL 414 | 0.17353 | BBB- |
| NPRL 415 | 0.43736 | BBB- |
| NPRL 416 | 0.30442 | BBB- |
| NPRL 417 | 0.29741 | BBB- |
| NPRL 418 | 0.68639 | BBB+ |
| NPRL 419 | 0.39254 | BBB- |
| NPRL 42  | 0.94813 | BBB+ |
| NPRL 420 | 0.20418 | BBB- |
| NPRL 421 | 0.17477 | BBB- |
| NPRL 425 | 0.00945 | BBB- |
| NPRL 426 | 0.53037 | BBB+ |
| NPRL 427 | 0.64416 | BBB+ |
| NPRL 429 | 0.91586 | BBB+ |
| NPRL 43  | 0.63884 | BBB+ |
| NPRL 430 | 0.93121 | BBB+ |
| NPRL 431 | 0.32376 | BBB- |
| NPRL 432 | 0.91257 | BBB+ |
| NPRL 433 | 0.67518 | BBB+ |
| NPRL 434 | 0.27250 | BBB- |
| NPRL 435 | 0.97494 | BBB+ |
| NPRL 436 | 0.99240 | BBB+ |
| NPRL 437 | 0.88665 | BBB+ |
| NPRL 438 | 0.03158 | BBB- |
| NPRL 439 | 0.02613 | BBB- |
| NPRL 44  | 0.97054 | BBB+ |
| NPRL 440 | 0.65465 | BBB+ |
| NPRL 441 | 0.24351 | BBB- |
| NPRL 442 | 0.05721 | BBB- |
| NPRL 443 | 0.15350 | BBB- |

|          |         |      |
|----------|---------|------|
| NPRL 444 | 0.17857 | BBB- |
| NPRL 445 | 0.79978 | BBB+ |
| NPRL 446 | 0.87862 | BBB+ |
| NPRL 447 | 0.98185 | BBB+ |
| NPRL 448 | 0.00546 | BBB- |
| NPRL 449 | 0.62246 | BBB+ |
| NPRL 45  | 0.79597 | BBB+ |
| NPRL 451 | 0.10454 | BBB- |
| NPRL 452 | 0.11871 | BBB- |
| NPRL 453 | 0.01680 | BBB- |
| NPRL 454 | 0.28519 | BBB- |
| NPRL 455 | 0.76101 | BBB+ |
| NPRL 456 | 0.63324 | BBB+ |
| NPRL 457 | 0.24213 | BBB- |
| NPRL 459 | 0.51539 | BBB+ |
| NPRL 46  | 0.67793 | BBB+ |
| NPRL 460 | 0.24883 | BBB- |
| NPRL 461 | 0.01366 | BBB- |
| NPRL 462 | 0.04844 | BBB- |
| NPRL 463 | 0.24888 | BBB- |
| NPRL 464 | 0.01744 | BBB- |
| NPRL 466 | 0.09536 | BBB- |
| NPRL 467 | 0.18568 | BBB- |
| NPRL 468 | 0.00718 | BBB- |
| NPRL 469 | 0.07958 | BBB- |
| NPRL 47  | 0.96751 | BBB+ |
| NPRL 470 | 0.00192 | BBB- |
| NPRL 471 | 0.00327 | BBB- |
| NPRL 472 | 0.06499 | BBB- |
| NPRL 473 | 0.17257 | BBB- |
| NPRL 474 | 0.94615 | BBB+ |
| NPRL 477 | 0.80287 | BBB+ |
| NPRL 478 | 0.39996 | BBB- |
| NPRL 479 | 0.17976 | BBB- |
| NPRL 48  | 0.97351 | BBB+ |
| NPRL 481 | 0.92420 | BBB+ |
| NPRL 482 | 0.81125 | BBB+ |
| NPRL 484 | 0.70336 | BBB+ |
| NPRL 49  | 0.39908 | BBB- |
| NPRL 491 | 0.02491 | BBB- |
| NPRL 492 | 0.92756 | BBB+ |
| NPRL 493 | 0.57034 | BBB+ |
| NPRL 495 | 0.98427 | BBB+ |
| NPRL 496 | 0.81913 | BBB+ |
| NPRL 497 | 0.92160 | BBB+ |
| NPRL 498 | 0.56267 | BBB+ |
| NPRL 499 | 0.78675 | BBB+ |
| NPRL 5   | 0.98923 | BBB+ |
| NPRL 50  | 0.66749 | BBB+ |
| NPRL 501 | 0.57001 | BBB+ |
| NPRL 502 | 0.65512 | BBB+ |
| NPRL 503 | 0.34566 | BBB- |
| NPRL 504 | 0.35356 | BBB- |
| NPRL 505 | 0.56631 | BBB+ |
| NPRL 506 | 0.98093 | BBB+ |
| NPRL 507 | 0.98386 | BBB+ |
| NPRL 508 | 0.29468 | BBB- |

|           |         |      |
|-----------|---------|------|
| NPRL 509  | 0.37675 | BBB- |
| NPRL 510  | 0.78661 | BBB+ |
| NPRL 511  | 0.55845 | BBB+ |
| NPRL 512  | 0.95693 | BBB+ |
| NPRL 513  | 0.80195 | BBB+ |
| NPRL 514  | 0.74587 | BBB+ |
| NPRL 516  | 0.62469 | BBB+ |
| NPRL 52   | 0.18844 | BBB- |
| NPRL 522  | 0.77151 | BBB+ |
| NPRL 524  | 0.85012 | BBB+ |
| NPRL 526  | 0.99576 | BBB+ |
| NPRL 527  | 0.87981 | BBB+ |
| NPRL 529  | 0.98777 | BBB+ |
| NPRL 53   | 0.91757 | BBB+ |
| NPRL 530  | 0.89159 | BBB+ |
| NPRL 532  | 0.99389 | BBB+ |
| NPRL 534  | 0.99431 | BBB+ |
| NPRL 535  | 0.88405 | BBB+ |
| NPRL 536  | 0.93616 | BBB+ |
| NPRL 537  | 0.88937 | BBB+ |
| NPRL 540  | 0.98718 | BBB+ |
| NPRL 541  | 0.91079 | BBB+ |
| NPRL 543  | 0.95187 | BBB+ |
| NPRL 544  | 0.62214 | BBB+ |
| NPRL 545  | 0.95396 | BBB+ |
| NPRL 546  | 0.99574 | BBB+ |
| NPRL 548  | 0.87154 | BBB+ |
| NPRL 55   | 0.98159 | BBB+ |
| NPRL 551  | 0.76043 | BBB+ |
| NPRL 552  | 0.57034 | BBB+ |
| NPRL 553  | 0.92082 | BBB+ |
| NPRL 554  | 0.85054 | BBB+ |
| NPRL 555  | 0.98084 | BBB+ |
| NPRL 556  | 0.25833 | BBB- |
| NPRL 557  | 0.92767 | BBB+ |
| NPRL 558  | 0.03205 | BBB- |
| NPRL 559  | 0.66994 | BBB+ |
| NPRL 56   | 0.96235 | BBB+ |
| NPRL 560  | 0.00162 | BBB- |
| NPRL 561  | 0.81615 | BBB+ |
| NPRL 562  | 0.89616 | BBB+ |
| NPRL 564  | 0.95420 | BBB+ |
| NPRL 565  | 0.81200 | BBB+ |
| NPRL 566  | 0.45395 | BBB- |
| NPRL 568  | 0.88962 | BBB+ |
| NPRL 570  | 0.01156 | BBB- |
| NPRL 571  | 0.87769 | BBB+ |
| NPRL 572  | 0.05633 | BBB- |
| NPRL 573  | 0.01442 | BBB- |
| NPRL 574  | 0.05886 | BBB- |
| NPRL 576  | 0.04254 | BBB- |
| NPRL 577  | 0.00618 | BBB- |
| NPRL 578  | 0.00582 | BBB- |
| NPRL 5781 | 0.02001 | BBB- |
| NPRL 5782 | 0.00494 | BBB- |
| NPRL 5783 | 0.00358 | BBB- |
| NPRL 5784 | 0.00794 | BBB- |

|           |         |      |
|-----------|---------|------|
| NPRL 5785 | 0.00071 | BBB- |
| NPRL 5786 | 0.01835 | BBB- |
| NPRL 5787 | 0.00211 | BBB- |
| NPRL 5788 | 0.00272 | BBB- |
| NPRL 5789 | 0.01191 | BBB- |
| NPRL 579  | 0.00229 | BBB- |
| NPRL 5790 | 0.00468 | BBB- |
| NPRL 5791 | 0.03091 | BBB- |
| NPRL 5792 | 0.03628 | BBB- |
| NPRL 5793 | 0.03926 | BBB- |
| NPRL 5794 | 0.02578 | BBB- |
| NPRL 5795 | 0.02413 | BBB- |
| NPRL 5796 | 0.01759 | BBB- |
| NPRL 5797 | 0.08373 | BBB- |
| NPRL 5798 | 0.02421 | BBB- |
| NPRL 5799 | 0.02572 | BBB- |
| NPRL 580  | 0.00088 | BBB- |
| NPRL 5800 | 0.00557 | BBB- |
| NPRL 5801 | 0.00627 | BBB- |
| NPRL 5802 | 0.00977 | BBB- |
| NPRL 5803 | 0.04112 | BBB- |
| NPRL 5804 | 0.07162 | BBB- |
| NPRL 5805 | 0.10548 | BBB- |
| NPRL 5806 | 0.04290 | BBB- |
| NPRL 5807 | 0.00325 | BBB- |
| NPRL 5808 | 0.15762 | BBB- |
| NPRL 5809 | 0.00093 | BBB- |
| NPRL 5810 | 0.03380 | BBB- |
| NPRL 5811 | 0.02523 | BBB- |
| NPRL 5814 | 0.41630 | BBB- |
| NPRL 5815 | 0.24097 | BBB- |
| NPRL 5816 | 0.01610 | BBB- |
| NPRL 5817 | 0.45050 | BBB- |
| NPRL 5818 | 0.02583 | BBB- |
| NPRL 5819 | 0.00218 | BBB- |
| NPRL 582  | 0.06583 | BBB- |
| NPRL 5820 | 0.04409 | BBB- |
| NPRL 5821 | 0.00865 | BBB- |
| NPRL 5822 | 0.02230 | BBB- |
| NPRL 5823 | 0.00378 | BBB- |
| NPRL 5824 | 0.00242 | BBB- |
| NPRL 5825 | 0.00370 | BBB- |
| NPRL 5826 | 0.00193 | BBB- |
| NPRL 5827 | 0.00072 | BBB- |
| NPRL 5828 | 0.00166 | BBB- |
| NPRL 5829 | 0.00211 | BBB- |
| NPRL 583  | 0.01509 | BBB- |
| NPRL 5830 | 0.00082 | BBB- |
| NPRL 5831 | 0.00245 | BBB- |
| NPRL 5832 | 0.01109 | BBB- |
| NPRL 5833 | 0.16617 | BBB- |
| NPRL 5834 | 0.08154 | BBB- |
| NPRL 5835 | 0.04147 | BBB- |
| NPRL 5836 | 0.02421 | BBB- |
| NPRL 5837 | 0.03079 | BBB- |
| NPRL 5838 | 0.00489 | BBB- |
| NPRL 5839 | 0.05746 | BBB- |

|                 |                |             |
|-----------------|----------------|-------------|
| NPRL 584        | 0.03576        | BBB-        |
| NPRL 5840       | 0.08547        | BBB-        |
| NPRL 5841       | 0.10930        | BBB-        |
| NPRL 5842       | 0.03268        | BBB-        |
| NPRL 5843       | 0.04212        | BBB-        |
| NPRL 5844       | 0.04313        | BBB-        |
| NPRL 5845       | 0.08902        | BBB-        |
| NPRL 5846       | 0.01574        | BBB-        |
| NPRL 5847       | 0.00956        | BBB-        |
| NPRL 5848       | 0.01853        | BBB-        |
| NPRL 585        | 0.02073        | BBB-        |
| NPRL 5864       | 0.00082        | BBB-        |
| NPRL 5865       | 0.00019        | BBB-        |
| NPRL 5866       | 0.00166        | BBB-        |
| NPRL 5867       | 0.01558        | BBB-        |
| NPRL 5868       | 0.02524        | BBB-        |
| NPRL 5869       | 0.05555        | BBB-        |
| NPRL 587        | 0.20025        | BBB-        |
| NPRL 5870       | 0.00015        | BBB-        |
| NPRL 5871       | 0.00061        | BBB-        |
| NPRL 5872       | 0.00049        | BBB-        |
| NPRL 5873       | 0.00017        | BBB-        |
| NPRL 5874       | 0.00049        | BBB-        |
| NPRL 5875       | 0.00405        | BBB-        |
| NPRL 5876       | 0.00015        | BBB-        |
| NPRL 5877       | 0.00003        | BBB-        |
| NPRL 5878       | 0.00016        | BBB-        |
| NPRL 5879       | 0.00044        | BBB-        |
| <b>NPRL 588</b> | <b>0.99820</b> | <b>BBB+</b> |
| NPRL 5880       | 0.00020        | BBB-        |
| NPRL 5881       | 0.01816        | BBB-        |
| NPRL 5882       | 0.00040        | BBB-        |
| NPRL 5883       | 0.00008        | BBB-        |
| NPRL 5884       | 0.00033        | BBB-        |
| NPRL 5885       | 0.00113        | BBB-        |
| NPRL 5886       | 0.00621        | BBB-        |
| NPRL 5887       | 0.00356        | BBB-        |
| <b>NPRL 589</b> | <b>0.88152</b> | <b>BBB+</b> |
| NPRL 5890       | 0.05230        | BBB-        |
| NPRL 5891       | 0.00105        | BBB-        |
| NPRL 5892       | 0.00149        | BBB-        |
| NPRL 5893       | 0.00439        | BBB-        |
| NPRL 5894       | 0.00421        | BBB-        |
| NPRL 5895       | 0.00361        | BBB-        |
| NPRL 5896       | 0.00257        | BBB-        |
| NPRL 5897       | 0.00251        | BBB-        |
| NPRL 5898       | 0.00433        | BBB-        |
| NPRL 5899       | 0.00323        | BBB-        |
| <b>NPRL 59</b>  | <b>0.85671</b> | <b>BBB+</b> |
| NPRL 590        | 0.43878        | BBB-        |
| NPRL 5900       | 0.00088        | BBB-        |
| NPRL 5901       | 0.00279        | BBB-        |
| NPRL 5902       | 0.00937        | BBB-        |
| NPRL 5903       | 0.00383        | BBB-        |
| NPRL 5904       | 0.00572        | BBB-        |
| NPRL 5905       | 0.00404        | BBB-        |
| NPRL 5906       | 0.00176        | BBB-        |

|           |         |      |
|-----------|---------|------|
| NPRL 5907 | 0.00437 | BBB- |
| NPRL 5908 | 0.00259 | BBB- |
| NPRL 5909 | 0.00178 | BBB- |
| NPRL 591  | 0.83005 | BBB+ |
| NPRL 5910 | 0.00171 | BBB- |
| NPRL 5911 | 0.00828 | BBB- |
| NPRL 5912 | 0.00967 | BBB- |
| NPRL 5913 | 0.51215 | BBB+ |
| NPRL 5916 | 0.00201 | BBB- |
| NPRL 5917 | 0.00292 | BBB- |
| NPRL 5918 | 0.00766 | BBB- |
| NPRL 5919 | 0.00124 | BBB- |
| NPRL 592  | 0.95813 | BBB+ |
| NPRL 5920 | 0.00080 | BBB- |
| NPRL 5921 | 0.00229 | BBB- |
| NPRL 5922 | 0.00094 | BBB- |
| NPRL 5923 | 0.00246 | BBB- |
| NPRL 5924 | 0.00715 | BBB- |
| NPRL 5925 | 0.00164 | BBB- |
| NPRL 5926 | 0.00063 | BBB- |
| NPRL 5927 | 0.00770 | BBB- |
| NPRL 5928 | 0.00163 | BBB- |
| NPRL 5929 | 0.00188 | BBB- |
| NPRL 5930 | 0.00199 | BBB- |
| NPRL 5931 | 0.00147 | BBB- |
| NPRL 5932 | 0.00461 | BBB- |
| NPRL 5933 | 0.05932 | BBB- |
| NPRL 5934 | 0.03851 | BBB- |
| NPRL 5935 | 0.00813 | BBB- |
| NPRL 5936 | 0.02399 | BBB- |
| NPRL 5937 | 0.03933 | BBB- |
| NPRL 5938 | 0.03303 | BBB- |
| NPRL 5939 | 0.02948 | BBB- |
| NPRL 594  | 0.99772 | BBB+ |
| NPRL 5940 | 0.02164 | BBB- |
| NPRL 5941 | 0.05605 | BBB- |
| NPRL 5942 | 0.08220 | BBB- |
| NPRL 5943 | 0.07086 | BBB- |
| NPRL 5944 | 0.02412 | BBB- |
| NPRL 5945 | 0.01996 | BBB- |
| NPRL 5946 | 0.05425 | BBB- |
| NPRL 5947 | 0.02051 | BBB- |
| NPRL 5948 | 0.23447 | BBB- |
| NPRL 5949 | 0.08805 | BBB- |
| NPRL 5950 | 0.14165 | BBB- |
| NPRL 5951 | 0.06182 | BBB- |
| NPRL 5952 | 0.10917 | BBB- |
| NPRL 5953 | 0.06843 | BBB- |
| NPRL 5954 | 0.21607 | BBB- |
| NPRL 5955 | 0.05959 | BBB- |
| NPRL 5956 | 0.23674 | BBB- |
| NPRL 5957 | 0.02722 | BBB- |
| NPRL 5958 | 0.00531 | BBB- |
| NPRL 5959 | 0.00292 | BBB- |
| NPRL 5960 | 0.00701 | BBB- |
| NPRL 5961 | 0.19797 | BBB- |
| NPRL 5962 | 0.01348 | BBB- |



|           |         |      |
|-----------|---------|------|
| NPRL 5963 | 0.03983 | BBB- |
| NPRL 5964 | 0.06399 | BBB- |
| NPRL 5965 | 0.03642 | BBB- |
| NPRL 5966 | 0.00407 | BBB- |
| NPRL 5967 | 0.01959 | BBB- |
| NPRL 5968 | 0.00564 | BBB- |
| NPRL 5969 | 0.00548 | BBB- |
| NPRL 597  | 0.89152 | BBB+ |
| NPRL 5970 | 0.53841 | BBB+ |
| NPRL 5971 | 0.04943 | BBB- |
| NPRL 5972 | 0.00079 | BBB- |
| NPRL 5973 | 0.00217 | BBB- |
| NPRL 5974 | 0.00471 | BBB- |
| NPRL 5975 | 0.03016 | BBB- |
| NPRL 5976 | 0.02029 | BBB- |
| NPRL 5977 | 0.17564 | BBB- |
| NPRL 5978 | 0.56230 | BBB+ |
| NPRL 5979 | 0.14157 | BBB- |
| NPRL 598  | 0.73963 | BBB+ |
| NPRL 5980 | 0.02862 | BBB- |
| NPRL 5981 | 0.03264 | BBB- |
| NPRL 5982 | 0.00715 | BBB- |
| NPRL 5983 | 0.03576 | BBB- |
| NPRL 5984 | 0.14279 | BBB- |
| NPRL 5985 | 0.00726 | BBB- |
| NPRL 5986 | 0.00118 | BBB- |
| NPRL 5988 | 0.00308 | BBB- |
| NPRL 5989 | 0.00835 | BBB- |
| NPRL 599  | 0.99064 | BBB+ |
| NPRL 5990 | 0.02571 | BBB- |
| NPRL 5991 | 0.00563 | BBB- |
| NPRL 5992 | 0.01353 | BBB- |
| NPRL 5993 | 0.00842 | BBB- |
| NPRL 5994 | 0.02388 | BBB- |
| NPRL 5995 | 0.00851 | BBB- |
| NPRL 5996 | 0.00403 | BBB- |
| NPRL 5997 | 0.03975 | BBB- |
| NPRL 5998 | 0.00833 | BBB- |
| NPRL 5999 | 0.04607 | BBB- |
| NPRL 6    | 0.21846 | BBB- |
| NPRL 60   | 0.96841 | BBB+ |
| NPRL 6000 | 0.03117 | BBB- |
| NPRL 6001 | 0.03293 | BBB- |
| NPRL 6002 | 0.04203 | BBB- |
| NPRL 6003 | 0.01265 | BBB- |
| NPRL 6004 | 0.01701 | BBB- |
| NPRL 6005 | 0.04903 | BBB- |
| NPRL 6006 | 0.04114 | BBB- |
| NPRL 6007 | 0.00178 | BBB- |
| NPRL 6008 | 0.01227 | BBB- |
| NPRL 6009 | 0.00663 | BBB- |
| NPRL 601  | 0.93767 | BBB+ |
| NPRL 6010 | 0.02557 | BBB- |
| NPRL 6011 | 0.04742 | BBB- |
| NPRL 6012 | 0.03664 | BBB- |
| NPRL 6013 | 0.01692 | BBB- |
| NPRL 6014 | 0.33950 | BBB- |

|           |         |      |
|-----------|---------|------|
| NPRL 6015 | 0.00263 | BBB- |
| NPRL 6016 | 0.00046 | BBB- |
| NPRL 6017 | 0.00202 | BBB- |
| NPRL 6018 | 0.00316 | BBB- |
| NPRL 6019 | 0.08663 | BBB- |
| NPRL 602  | 0.94541 | BBB+ |
| NPRL 6020 | 0.01307 | BBB- |
| NPRL 6021 | 0.04167 | BBB- |
| NPRL 6022 | 0.07687 | BBB- |
| NPRL 6023 | 0.04859 | BBB- |
| NPRL 6024 | 0.05833 | BBB- |
| NPRL 6025 | 0.03498 | BBB- |
| NPRL 6026 | 0.09618 | BBB- |
| NPRL 6027 | 0.00596 | BBB- |
| NPRL 6028 | 0.00251 | BBB- |
| NPRL 6029 | 0.00129 | BBB- |
| NPRL 603  | 0.96774 | BBB+ |
| NPRL 6030 | 0.02024 | BBB- |
| NPRL 6031 | 0.10084 | BBB- |
| NPRL 6032 | 0.02428 | BBB- |
| NPRL 6033 | 0.03661 | BBB- |
| NPRL 6034 | 0.00059 | BBB- |
| NPRL 6035 | 0.00126 | BBB- |
| NPRL 6036 | 0.00055 | BBB- |
| NPRL 6037 | 0.01638 | BBB- |
| NPRL 6038 | 0.01460 | BBB- |
| NPRL 6039 | 0.00172 | BBB- |
| NPRL 6040 | 0.00113 | BBB- |
| NPRL 6041 | 0.00348 | BBB- |
| NPRL 6042 | 0.00820 | BBB- |
| NPRL 6043 | 0.00081 | BBB- |
| NPRL 6044 | 0.00357 | BBB- |
| NPRL 6045 | 0.10630 | BBB- |
| NPRL 6046 | 0.07063 | BBB- |
| NPRL 6047 | 0.11301 | BBB- |
| NPRL 6048 | 0.28920 | BBB- |
| NPRL 6049 | 0.20355 | BBB- |
| NPRL 6050 | 0.26426 | BBB- |
| NPRL 6051 | 0.27059 | BBB- |
| NPRL 6052 | 0.17637 | BBB- |
| NPRL 6053 | 0.05008 | BBB- |
| NPRL 6054 | 0.00728 | BBB- |
| NPRL 6055 | 0.06805 | BBB- |
| NPRL 6056 | 0.01397 | BBB- |
| NPRL 6057 | 0.01051 | BBB- |
| NPRL 6058 | 0.06530 | BBB- |
| NPRL 6059 | 0.16422 | BBB- |
| NPRL 6060 | 0.04962 | BBB- |
| NPRL 6062 | 0.17673 | BBB- |
| NPRL 6063 | 0.00140 | BBB- |
| NPRL 6064 | 0.00991 | BBB- |
| NPRL 6065 | 0.00406 | BBB- |
| NPRL 6066 | 0.03380 | BBB- |
| NPRL 6067 | 0.12536 | BBB- |
| NPRL 6068 | 0.06564 | BBB- |
| NPRL 6069 | 0.02543 | BBB- |
| NPRL 6070 | 0.00817 | BBB- |

|           |         |      |
|-----------|---------|------|
| NPRL 6071 | 0.01582 | BBB- |
| NPRL 6072 | 0.01450 | BBB- |
| NPRL 6073 | 0.04595 | BBB- |
| NPRL 6074 | 0.05996 | BBB- |
| NPRL 6075 | 0.01843 | BBB- |
| NPRL 6076 | 0.00140 | BBB- |
| NPRL 6077 | 0.00092 | BBB- |
| NPRL 6078 | 0.00342 | BBB- |
| NPRL 6079 | 0.00213 | BBB- |
| NPRL 6080 | 0.01293 | BBB- |
| NPRL 6081 | 0.00475 | BBB- |
| NPRL 6082 | 0.00531 | BBB- |
| NPRL 6083 | 0.00961 | BBB- |
| NPRL 6084 | 0.38289 | BBB- |
| NPRL 6085 | 0.83337 | BBB+ |
| NPRL 6086 | 0.15643 | BBB- |
| NPRL 6087 | 0.01204 | BBB- |
| NPRL 6088 | 0.03344 | BBB- |
| NPRL 6089 | 0.17443 | BBB- |
| NPRL 6090 | 0.03093 | BBB- |
| NPRL 6091 | 0.29883 | BBB- |
| NPRL 6092 | 0.28442 | BBB- |
| NPRL 6093 | 0.29589 | BBB- |
| NPRL 6094 | 0.16706 | BBB- |
| NPRL 6095 | 0.87244 | BBB+ |
| NPRL 6097 | 0.99674 | BBB+ |
| NPRL 6098 | 0.97778 | BBB+ |
| NPRL 6099 | 0.95092 | BBB+ |
| NPRL 61   | 0.54800 | BBB+ |
| NPRL 6100 | 0.99667 | BBB+ |
| NPRL 6101 | 0.19688 | BBB- |
| NPRL 6102 | 0.44637 | BBB- |
| NPRL 6103 | 0.31061 | BBB- |
| NPRL 6104 | 0.38374 | BBB- |
| NPRL 6105 | 0.59114 | BBB+ |
| NPRL 6106 | 0.47341 | BBB- |
| NPRL 6107 | 0.34001 | BBB- |
| NPRL 6108 | 0.41650 | BBB- |
| NPRL 6109 | 0.24049 | BBB- |
| NPRL 6110 | 0.34807 | BBB- |
| NPRL 6111 | 0.36734 | BBB- |
| NPRL 6112 | 0.38833 | BBB- |
| NPRL 6113 | 0.44407 | BBB- |
| NPRL 6114 | 0.57872 | BBB+ |
| NPRL 6115 | 0.49941 | BBB- |
| NPRL 6116 | 0.63515 | BBB+ |
| NPRL 6117 | 0.06312 | BBB- |
| NPRL 6118 | 0.04030 | BBB- |
| NPRL 6119 | 0.03529 | BBB- |
| NPRL 6120 | 0.01999 | BBB- |
| NPRL 6121 | 0.91775 | BBB+ |
| NPRL 6122 | 0.93319 | BBB+ |
| NPRL 6123 | 0.98914 | BBB+ |
| NPRL 6124 | 0.99352 | BBB+ |
| NPRL 6125 | 0.97740 | BBB+ |
| NPRL 6126 | 0.94540 | BBB+ |
| NPRL 6127 | 0.96949 | BBB+ |

|           |         |      |
|-----------|---------|------|
| NPRL 6128 | 0.98846 | BBB+ |
| NPRL 6129 | 0.80350 | BBB+ |
| NPRL 6130 | 0.87450 | BBB+ |
| NPRL 6131 | 0.99811 | BBB+ |
| NPRL 6132 | 0.95960 | BBB+ |
| NPRL 6133 | 0.90730 | BBB+ |
| NPRL 6134 | 0.86384 | BBB+ |
| NPRL 6135 | 0.96090 | BBB+ |
| NPRL 6136 | 0.99725 | BBB+ |
| NPRL 6137 | 0.67011 | BBB+ |
| NPRL 6138 | 0.69767 | BBB+ |
| NPRL 6139 | 0.97137 | BBB+ |
| NPRL 614  | 0.95216 | BBB+ |
| NPRL 6140 | 0.98750 | BBB+ |
| NPRL 6141 | 0.95261 | BBB+ |
| NPRL 6142 | 0.96980 | BBB+ |
| NPRL 6143 | 0.94043 | BBB+ |
| NPRL 6144 | 0.95424 | BBB+ |
| NPRL 6145 | 0.92179 | BBB+ |
| NPRL 6146 | 0.91727 | BBB+ |
| NPRL 6147 | 0.84449 | BBB+ |
| NPRL 6148 | 0.87443 | BBB+ |
| NPRL 6149 | 0.18910 | BBB- |
| NPRL 6150 | 0.96935 | BBB+ |
| NPRL 6151 | 0.94401 | BBB+ |
| NPRL 6152 | 0.94767 | BBB+ |
| NPRL 6153 | 0.99675 | BBB+ |
| NPRL 6154 | 0.99967 | BBB+ |
| NPRL 6155 | 0.99885 | BBB+ |
| NPRL 6156 | 0.99858 | BBB+ |
| NPRL 6157 | 0.99342 | BBB+ |
| NPRL 6158 | 0.99598 | BBB+ |
| NPRL 6159 | 0.99921 | BBB+ |
| NPRL 6160 | 0.99061 | BBB+ |
| NPRL 6162 | 0.04530 | BBB- |
| NPRL 6163 | 0.00448 | BBB- |
| NPRL 6164 | 0.03933 | BBB- |
| NPRL 6165 | 0.03613 | BBB- |
| NPRL 6166 | 0.01228 | BBB- |
| NPRL 6167 | 0.00149 | BBB- |
| NPRL 6168 | 0.00959 | BBB- |
| NPRL 6169 | 0.01039 | BBB- |
| NPRL 6170 | 0.01555 | BBB- |
| NPRL 6171 | 0.03042 | BBB- |
| NPRL 6172 | 0.00530 | BBB- |
| NPRL 6173 | 0.04078 | BBB- |
| NPRL 6174 | 0.03874 | BBB- |
| NPRL 6175 | 0.02910 | BBB- |
| NPRL 6176 | 0.05801 | BBB- |
| NPRL 6177 | 0.06085 | BBB- |
| NPRL 6178 | 0.01855 | BBB- |
| NPRL 6179 | 0.01780 | BBB- |
| NPRL 6180 | 0.00711 | BBB- |
| NPRL 6181 | 0.00918 | BBB- |
| NPRL 6182 | 0.01398 | BBB- |
| NPRL 6183 | 0.01404 | BBB- |
| NPRL 6184 | 0.02622 | BBB- |

|           |         |      |
|-----------|---------|------|
| NPRL 6185 | 0.04245 | BBB- |
| NPRL 6186 | 0.00879 | BBB- |
| NPRL 6187 | 0.01424 | BBB- |
| NPRL 6188 | 0.00888 | BBB- |
| NPRL 6189 | 0.01369 | BBB- |
| NPRL 6190 | 0.00081 | BBB- |
| NPRL 6191 | 0.01164 | BBB- |
| NPRL 6192 | 0.00244 | BBB- |
| NPRL 6193 | 0.00822 | BBB- |
| NPRL 6194 | 0.00709 | BBB- |
| NPRL 6196 | 0.49600 | BBB- |
| NPRL 6197 | 0.97206 | BBB+ |
| NPRL 6198 | 0.70129 | BBB+ |
| NPRL 6199 | 0.05900 | BBB- |
| NPRL 62   | 0.02519 | BBB- |
| NPRL 620  | 0.44151 | BBB- |
| NPRL 6200 | 0.70305 | BBB+ |
| NPRL 6201 | 0.34672 | BBB- |
| NPRL 6202 | 0.54283 | BBB+ |
| NPRL 6203 | 0.20819 | BBB- |
| NPRL 6204 | 0.06910 | BBB- |
| NPRL 6205 | 0.50350 | BBB+ |
| NPRL 6206 | 0.73094 | BBB+ |
| NPRL 6207 | 0.72909 | BBB+ |
| NPRL 6208 | 0.85919 | BBB+ |
| NPRL 6209 | 0.85587 | BBB+ |
| NPRL 6210 | 0.91665 | BBB+ |
| NPRL 6211 | 0.95550 | BBB+ |
| NPRL 6212 | 0.93951 | BBB+ |
| NPRL 6213 | 0.33433 | BBB- |
| NPRL 6214 | 0.19563 | BBB- |
| NPRL 6215 | 0.08268 | BBB- |
| NPRL 6216 | 0.80737 | BBB+ |
| NPRL 6217 | 0.78390 | BBB+ |
| NPRL 6218 | 0.63284 | BBB+ |
| NPRL 622  | 0.99187 | BBB+ |
| NPRL 625  | 0.25815 | BBB- |
| NPRL 626  | 0.82208 | BBB+ |
| NPRL 6266 | 0.57337 | BBB+ |
| NPRL 6267 | 0.03582 | BBB- |
| NPRL 6268 | 0.09079 | BBB- |
| NPRL 6269 | 0.38305 | BBB- |
| NPRL 627  | 0.99125 | BBB+ |
| NPRL 6270 | 0.87025 | BBB+ |
| NPRL 6271 | 0.35209 | BBB- |
| NPRL 6272 | 0.79814 | BBB+ |
| NPRL 6273 | 0.98885 | BBB+ |
| NPRL 6274 | 0.93742 | BBB+ |
| NPRL 6276 | 0.87699 | BBB+ |
| NPRL 6277 | 0.71446 | BBB+ |
| NPRL 6278 | 0.98202 | BBB+ |
| NPRL 6279 | 0.97035 | BBB+ |
| NPRL 6280 | 0.65378 | BBB+ |
| NPRL 6281 | 0.57796 | BBB+ |
| NPRL 6283 | 0.99890 | BBB+ |
| NPRL 6284 | 0.99826 | BBB+ |
| NPRL 6285 | 0.99222 | BBB+ |

|           |         |      |
|-----------|---------|------|
| NPRL 6286 | 0.80984 | BBB+ |
| NPRL 6287 | 0.42695 | BBB- |
| NPRL 6288 | 0.13815 | BBB- |
| NPRL 6289 | 0.42417 | BBB- |
| NPRL 6291 | 0.01013 | BBB- |
| NPRL 6292 | 0.00068 | BBB- |
| NPRL 6293 | 0.47661 | BBB- |
| NPRL 6294 | 0.38800 | BBB- |
| NPRL 6295 | 0.00022 | BBB- |
| NPRL 6296 | 0.00041 | BBB- |
| NPRL 6297 | 0.00032 | BBB- |
| NPRL 6298 | 0.00041 | BBB- |
| NPRL 6299 | 0.81424 | BBB+ |
| NPRL 630  | 0.90614 | BBB+ |
| NPRL 6300 | 0.73116 | BBB+ |
| NPRL 6302 | 0.88625 | BBB+ |
| NPRL 6303 | 0.76013 | BBB+ |
| NPRL 6304 | 0.97945 | BBB+ |
| NPRL 6305 | 0.97321 | BBB+ |
| NPRL 6306 | 0.00006 | BBB- |
| NPRL 6307 | 0.00006 | BBB- |
| NPRL 6309 | 0.72461 | BBB+ |
| NPRL 631  | 0.60716 | BBB+ |
| NPRL 6310 | 0.00628 | BBB- |
| NPRL 6311 | 0.77693 | BBB+ |
| NPRL 6312 | 0.12465 | BBB- |
| NPRL 6314 | 0.00633 | BBB- |
| NPRL 6315 | 0.82329 | BBB+ |
| NPRL 6316 | 0.70193 | BBB+ |
| NPRL 6317 | 0.94328 | BBB+ |
| NPRL 6318 | 0.45448 | BBB- |
| NPRL 6319 | 0.00435 | BBB- |
| NPRL 632  | 0.86776 | BBB+ |
| NPRL 6320 | 0.98586 | BBB+ |
| NPRL 6321 | 0.64523 | BBB+ |
| NPRL 6322 | 0.08037 | BBB- |
| NPRL 6323 | 0.00764 | BBB- |
| NPRL 6324 | 0.00132 | BBB- |
| NPRL 6325 | 0.00079 | BBB- |
| NPRL 6326 | 0.04550 | BBB- |
| NPRL 6327 | 0.01284 | BBB- |
| NPRL 6328 | 0.00135 | BBB- |
| NPRL 6329 | 0.00668 | BBB- |
| NPRL 6330 | 0.00480 | BBB- |
| NPRL 6331 | 0.19758 | BBB- |
| NPRL 6332 | 0.06707 | BBB- |
| NPRL 6333 | 0.37429 | BBB- |
| NPRL 6334 | 0.19602 | BBB- |
| NPRL 6336 | 0.18590 | BBB- |
| NPRL 6337 | 0.04965 | BBB- |
| NPRL 6338 | 0.00468 | BBB- |
| NPRL 6339 | 0.00092 | BBB- |
| NPRL 6340 | 0.00253 | BBB- |
| NPRL 6341 | 0.00281 | BBB- |
| NPRL 6342 | 0.00037 | BBB- |
| NPRL 6343 | 0.02561 | BBB- |
| NPRL 6345 | 0.61457 | BBB+ |

|           |         |      |
|-----------|---------|------|
| NPRL 6347 | 0.98605 | BBB+ |
| NPRL 6348 | 0.86018 | BBB+ |
| NPRL 6349 | 0.00123 | BBB- |
| NPRL 6350 | 0.07390 | BBB- |
| NPRL 6351 | 0.23624 | BBB- |
| NPRL 6352 | 0.01394 | BBB- |
| NPRL 6353 | 0.07879 | BBB- |
| NPRL 6354 | 0.22570 | BBB- |
| NPRL 6355 | 0.16475 | BBB- |
| NPRL 6356 | 0.51805 | BBB+ |
| NPRL 6357 | 0.03773 | BBB- |
| NPRL 6358 | 0.99445 | BBB+ |
| NPRL 6359 | 0.94769 | BBB+ |
| NPRL 636  | 0.75740 | BBB+ |
| NPRL 6360 | 0.94840 | BBB+ |
| NPRL 6362 | 0.89191 | BBB+ |
| NPRL 6363 | 0.93261 | BBB+ |
| NPRL 6364 | 0.97180 | BBB+ |
| NPRL 6365 | 0.64914 | BBB+ |
| NPRL 6366 | 0.95897 | BBB+ |
| NPRL 6367 | 0.78305 | BBB+ |
| NPRL 6368 | 0.94992 | BBB+ |
| NPRL 6369 | 0.93360 | BBB+ |
| NPRL 6370 | 0.93896 | BBB+ |
| NPRL 6371 | 0.92914 | BBB+ |
| NPRL 6372 | 0.89783 | BBB+ |
| NPRL 6373 | 0.73448 | BBB+ |
| NPRL 6374 | 0.70663 | BBB+ |
| NPRL 6375 | 0.97405 | BBB+ |
| NPRL 6376 | 0.87801 | BBB+ |
| NPRL 6377 | 0.69613 | BBB+ |
| NPRL 6378 | 0.39451 | BBB- |
| NPRL 6379 | 0.92207 | BBB+ |
| NPRL 6380 | 0.64468 | BBB+ |
| NPRL 6381 | 0.00660 | BBB- |
| NPRL 6382 | 0.94825 | BBB+ |
| NPRL 6383 | 0.06883 | BBB- |
| NPRL 6384 | 0.23500 | BBB- |
| NPRL 6385 | 0.27303 | BBB- |
| NPRL 6386 | 0.89028 | BBB+ |
| NPRL 6387 | 0.78977 | BBB+ |
| NPRL 6388 | 0.15729 | BBB- |
| NPRL 6389 | 0.56779 | BBB+ |
| NPRL 6390 | 0.86086 | BBB+ |
| NPRL 6391 | 0.38124 | BBB- |
| NPRL 6392 | 0.00143 | BBB- |
| NPRL 6393 | 0.32590 | BBB- |
| NPRL 6394 | 0.00124 | BBB- |
| NPRL 6395 | 0.05746 | BBB- |
| NPRL 6396 | 0.06243 | BBB- |
| NPRL 6397 | 0.18351 | BBB- |
| NPRL 6398 | 0.03631 | BBB- |
| NPRL 6399 | 0.00982 | BBB- |
| NPRL 64   | 0.00550 | BBB- |
| NPRL 640  | 0.96624 | BBB+ |
| NPRL 6400 | 0.78975 | BBB+ |
| NPRL 6401 | 0.01115 | BBB- |

|           |         |      |
|-----------|---------|------|
| NPRL 6402 | 0.06259 | BBB- |
| NPRL 6403 | 0.80772 | BBB+ |
| NPRL 6404 | 0.99678 | BBB+ |
| NPRL 6405 | 0.92160 | BBB+ |
| NPRL 6406 | 0.63767 | BBB+ |
| NPRL 6407 | 0.01621 | BBB- |
| NPRL 6408 | 0.94718 | BBB+ |
| NPRL 6409 | 0.09052 | BBB- |
| NPRL 641  | 0.46290 | BBB- |
| NPRL 6410 | 0.09782 | BBB- |
| NPRL 6411 | 0.49495 | BBB- |
| NPRL 6412 | 0.23959 | BBB- |
| NPRL 6413 | 0.55503 | BBB+ |
| NPRL 6414 | 0.99775 | BBB+ |
| NPRL 6415 | 0.99659 | BBB+ |
| NPRL 6416 | 0.71807 | BBB+ |
| NPRL 6417 | 0.86044 | BBB+ |
| NPRL 6419 | 0.92252 | BBB+ |
| NPRL 642  | 0.96170 | BBB+ |
| NPRL 6420 | 0.92706 | BBB+ |
| NPRL 6421 | 0.52280 | BBB+ |
| NPRL 6422 | 0.11670 | BBB- |
| NPRL 6423 | 0.24844 | BBB- |
| NPRL 6424 | 0.11420 | BBB- |
| NPRL 6425 | 0.19302 | BBB- |
| NPRL 6426 | 0.72740 | BBB+ |
| NPRL 6427 | 0.55778 | BBB+ |
| NPRL 6428 | 0.88380 | BBB+ |
| NPRL 6429 | 0.33275 | BBB- |
| NPRL 6430 | 0.86560 | BBB+ |
| NPRL 6431 | 0.64989 | BBB+ |
| NPRL 6432 | 0.39297 | BBB- |
| NPRL 6433 | 0.97302 | BBB+ |
| NPRL 6434 | 0.06243 | BBB- |
| NPRL 6435 | 0.36458 | BBB- |
| NPRL 6436 | 0.92121 | BBB+ |
| NPRL 6437 | 0.99196 | BBB+ |
| NPRL 6438 | 0.98868 | BBB+ |
| NPRL 6439 | 0.88147 | BBB+ |
| NPRL 644  | 0.98197 | BBB+ |
| NPRL 6440 | 0.88061 | BBB+ |
| NPRL 6441 | 0.92168 | BBB+ |
| NPRL 6442 | 0.72543 | BBB+ |
| NPRL 6443 | 0.81855 | BBB+ |
| NPRL 6444 | 0.86073 | BBB+ |
| NPRL 6445 | 0.57193 | BBB+ |
| NPRL 6446 | 0.89184 | BBB+ |
| NPRL 6447 | 0.90650 | BBB+ |
| NPRL 6448 | 0.93608 | BBB+ |
| NPRL 6449 | 0.85018 | BBB+ |
| NPRL 6450 | 0.67395 | BBB+ |
| NPRL 6451 | 0.84151 | BBB+ |
| NPRL 6452 | 0.73517 | BBB+ |
| NPRL 6453 | 0.21883 | BBB- |
| NPRL 6454 | 0.80327 | BBB+ |
| NPRL 6455 | 0.64575 | BBB+ |
| NPRL 6456 | 0.09483 | BBB- |



|           |         |      |
|-----------|---------|------|
| NPRL 6457 | 0.52363 | BBB+ |
| NPRL 6458 | 0.98312 | BBB+ |
| NPRL 6459 | 0.82267 | BBB+ |
| NPRL 6460 | 0.47753 | BBB- |
| NPRL 6461 | 0.55745 | BBB+ |
| NPRL 6463 | 0.25143 | BBB- |
| NPRL 6464 | 0.89551 | BBB+ |
| NPRL 6465 | 0.85573 | BBB+ |
| NPRL 6466 | 0.63410 | BBB+ |
| NPRL 6467 | 0.77220 | BBB+ |
| NPRL 6468 | 0.98403 | BBB+ |
| NPRL 6469 | 0.77105 | BBB+ |
| NPRL 6470 | 0.89121 | BBB+ |
| NPRL 6471 | 0.88181 | BBB+ |
| NPRL 6472 | 0.98567 | BBB+ |
| NPRL 6473 | 0.66035 | BBB+ |
| NPRL 6474 | 0.71529 | BBB+ |
| NPRL 6486 | 0.99288 | BBB+ |
| NPRL 6487 | 0.70031 | BBB+ |
| NPRL 6488 | 0.99003 | BBB+ |
| NPRL 6489 | 0.63657 | BBB+ |
| NPRL 6490 | 0.81756 | BBB+ |
| NPRL 6491 | 0.67188 | BBB+ |
| NPRL 6492 | 0.85966 | BBB+ |
| NPRL 6493 | 0.60718 | BBB+ |
| NPRL 6494 | 0.77017 | BBB+ |
| NPRL 6495 | 0.14691 | BBB- |
| NPRL 6496 | 0.87192 | BBB+ |
| NPRL 6497 | 0.25301 | BBB- |
| NPRL 6498 | 0.88124 | BBB+ |
| NPRL 6499 | 0.96223 | BBB+ |
| NPRL 6500 | 0.98057 | BBB+ |
| NPRL 6501 | 0.98677 | BBB+ |
| NPRL 6502 | 0.14108 | BBB- |
| NPRL 6503 | 0.55335 | BBB+ |
| NPRL 6504 | 0.17468 | BBB- |
| NPRL 6511 | 0.52799 | BBB+ |
| NPRL 6512 | 0.62044 | BBB+ |
| NPRL 6513 | 0.35545 | BBB- |
| NPRL 6514 | 0.01835 | BBB- |
| NPRL 6515 | 0.98467 | BBB+ |
| NPRL 6516 | 0.98954 | BBB+ |
| NPRL 6517 | 0.92595 | BBB+ |
| NPRL 6518 | 0.72816 | BBB+ |
| NPRL 6519 | 0.89229 | BBB+ |
| NPRL 6520 | 0.90638 | BBB+ |
| NPRL 6521 | 0.56804 | BBB+ |
| NPRL 6522 | 0.95816 | BBB+ |
| NPRL 6523 | 0.92237 | BBB+ |
| NPRL 6524 | 0.98709 | BBB+ |
| NPRL 6525 | 0.12830 | BBB- |
| NPRL 6526 | 0.90453 | BBB+ |
| NPRL 6527 | 0.75715 | BBB+ |
| NPRL 6528 | 0.99923 | BBB+ |
| NPRL 6529 | 0.43284 | BBB- |
| NPRL 653  | 0.99372 | BBB+ |
| NPRL 6530 | 0.50284 | BBB+ |

|           |         |      |
|-----------|---------|------|
| NPRL 6531 | 0.92777 | BBB+ |
| NPRL 6532 | 0.76781 | BBB+ |
| NPRL 6533 | 0.14704 | BBB- |
| NPRL 6534 | 0.16221 | BBB- |
| NPRL 6535 | 0.63615 | BBB+ |
| NPRL 6536 | 0.96084 | BBB+ |
| NPRL 6537 | 0.92210 | BBB+ |
| NPRL 6538 | 0.69603 | BBB+ |
| NPRL 6539 | 0.99122 | BBB+ |
| NPRL 6540 | 0.81724 | BBB+ |
| NPRL 6541 | 0.96583 | BBB+ |
| NPRL 6542 | 0.82740 | BBB+ |
| NPRL 6543 | 0.82942 | BBB+ |
| NPRL 6544 | 0.31121 | BBB- |
| NPRL 6545 | 0.94574 | BBB+ |
| NPRL 6546 | 0.70772 | BBB+ |
| NPRL 6547 | 0.87603 | BBB+ |
| NPRL 6548 | 0.60117 | BBB+ |
| NPRL 6549 | 0.89286 | BBB+ |
| NPRL 6553 | 0.01711 | BBB- |
| NPRL 6554 | 0.00847 | BBB- |
| NPRL 6555 | 0.93396 | BBB+ |
| NPRL 6556 | 0.00388 | BBB- |
| NPRL 6557 | 0.92541 | BBB+ |
| NPRL 6558 | 0.66165 | BBB+ |
| NPRL 6559 | 0.65618 | BBB+ |
| NPRL 656  | 0.19896 | BBB- |
| NPRL 6560 | 0.52873 | BBB+ |
| NPRL 6561 | 0.52499 | BBB+ |
| NPRL 6562 | 0.01697 | BBB- |
| NPRL 6563 | 0.97460 | BBB+ |
| NPRL 6567 | 0.97437 | BBB+ |
| NPRL 6568 | 0.86778 | BBB+ |
| NPRL 6569 | 0.99862 | BBB+ |
| NPRL 657  | 0.90015 | BBB+ |
| NPRL 6571 | 0.78975 | BBB+ |
| NPRL 6572 | 0.94913 | BBB+ |
| NPRL 6573 | 0.87491 | BBB+ |
| NPRL 6574 | 0.86133 | BBB+ |
| NPRL 6575 | 0.70980 | BBB+ |
| NPRL 658  | 0.86156 | BBB+ |
| NPRL 6585 | 0.06019 | BBB- |
| NPRL 6586 | 0.07174 | BBB- |
| NPRL 6587 | 0.01573 | BBB- |
| NPRL 6588 | 0.00068 | BBB- |
| NPRL 6589 | 0.82528 | BBB+ |
| NPRL 659  | 0.74572 | BBB+ |
| NPRL 66   | 0.42862 | BBB- |
| NPRL 660  | 0.43643 | BBB- |
| NPRL 661  | 0.96423 | BBB+ |
| NPRL 662  | 0.71168 | BBB+ |
| NPRL 663  | 0.95448 | BBB+ |
| NPRL 664  | 0.74560 | BBB+ |
| NPRL 665  | 0.99973 | BBB+ |
| NPRL 667  | 0.95050 | BBB+ |
| NPRL 669  | 0.97498 | BBB+ |
| NPRL 67   | 0.97987 | BBB+ |

|          |         |      |
|----------|---------|------|
| NPRL 670 | 0.92492 | BBB+ |
| NPRL 671 | 0.55757 | BBB+ |
| NPRL 675 | 0.89907 | BBB+ |
| NPRL 676 | 0.90120 | BBB+ |
| NPRL 677 | 0.95284 | BBB+ |
| NPRL 679 | 0.90489 | BBB+ |
| NPRL 68  | 0.18806 | BBB- |
| NPRL 680 | 0.91965 | BBB+ |
| NPRL 682 | 0.95535 | BBB+ |
| NPRL 684 | 0.97613 | BBB+ |
| NPRL 685 | 0.96437 | BBB+ |
| NPRL 686 | 0.41527 | BBB- |
| NPRL 688 | 0.42443 | BBB- |
| NPRL 689 | 0.51969 | BBB+ |
| NPRL 69  | 0.78820 | BBB+ |
| NPRL 690 | 0.58025 | BBB+ |
| NPRL 691 | 0.84120 | BBB+ |
| NPRL 692 | 0.66610 | BBB+ |
| NPRL 693 | 0.55252 | BBB+ |
| NPRL 694 | 0.34317 | BBB- |
| NPRL 695 | 0.71551 | BBB+ |
| NPRL 698 | 0.77869 | BBB+ |
| NPRL 7   | 0.96395 | BBB+ |
| NPRL 70  | 0.95143 | BBB+ |
| NPRL 700 | 0.82284 | BBB+ |
| NPRL 702 | 0.08128 | BBB- |
| NPRL 703 | 0.99225 | BBB+ |
| NPRL 704 | 0.80018 | BBB+ |
| NPRL 707 | 0.98679 | BBB+ |
| NPRL 71  | 0.12443 | BBB- |
| NPRL 72  | 0.98842 | BBB+ |
| NPRL 720 | 0.58961 | BBB+ |
| NPRL 723 | 0.94272 | BBB+ |
| NPRL 724 | 0.01967 | BBB- |
| NPRL 725 | 0.03401 | BBB- |
| NPRL 726 | 0.01031 | BBB- |
| NPRL 727 | 0.01797 | BBB- |
| NPRL 728 | 0.05503 | BBB- |
| NPRL 729 | 0.10337 | BBB- |
| NPRL 73  | 0.97144 | BBB+ |
| NPRL 730 | 0.10941 | BBB- |
| NPRL 731 | 0.01747 | BBB- |
| NPRL 732 | 0.03271 | BBB- |
| NPRL 733 | 0.00237 | BBB- |
| NPRL 734 | 0.09378 | BBB- |
| NPRL 736 | 0.03210 | BBB- |
| NPRL 737 | 0.10902 | BBB- |
| NPRL 738 | 0.07600 | BBB- |
| NPRL 739 | 0.04755 | BBB- |
| NPRL 74  | 0.91477 | BBB+ |
| NPRL 740 | 0.09973 | BBB- |
| NPRL 741 | 0.00201 | BBB- |
| NPRL 742 | 0.01944 | BBB- |
| NPRL 743 | 0.02518 | BBB- |
| NPRL 744 | 0.01879 | BBB- |
| NPRL 745 | 0.10316 | BBB- |
| NPRL 746 | 0.05289 | BBB- |

|          |         |      |
|----------|---------|------|
| NPRL 747 | 0.98793 | BBB+ |
| NPRL 748 | 0.13040 | BBB- |
| NPRL 75  | 0.59050 | BBB+ |
| NPRL 751 | 0.41952 | BBB- |
| NPRL 752 | 0.10579 | BBB- |
| NPRL 753 | 0.88396 | BBB+ |
| NPRL 754 | 0.23299 | BBB- |
| NPRL 755 | 0.91572 | BBB+ |
| NPRL 756 | 0.04363 | BBB- |
| NPRL 757 | 0.42893 | BBB- |
| NPRL 758 | 0.54158 | BBB+ |
| NPRL 759 | 0.64358 | BBB+ |
| NPRL 76  | 0.98463 | BBB+ |
| NPRL 760 | 0.11311 | BBB- |
| NPRL 762 | 0.98674 | BBB+ |
| NPRL 763 | 0.91188 | BBB+ |
| NPRL 764 | 0.95595 | BBB+ |
| NPRL 765 | 0.66515 | BBB+ |
| NPRL 766 | 0.60728 | BBB+ |
| NPRL 767 | 0.84704 | BBB+ |
| NPRL 768 | 0.38620 | BBB- |
| NPRL 769 | 0.53144 | BBB+ |
| NPRL 77  | 0.14228 | BBB- |
| NPRL 770 | 0.98778 | BBB+ |
| NPRL 771 | 0.86314 | BBB+ |
| NPRL 772 | 0.97580 | BBB+ |
| NPRL 773 | 0.74348 | BBB+ |
| NPRL 774 | 0.86126 | BBB+ |
| NPRL 775 | 0.97938 | BBB+ |
| NPRL 776 | 0.78735 | BBB+ |
| NPRL 777 | 0.78023 | BBB+ |
| NPRL 778 | 0.39870 | BBB- |
| NPRL 779 | 0.62232 | BBB+ |
| NPRL 78  | 0.42539 | BBB- |
| NPRL 780 | 0.63185 | BBB+ |
| NPRL 781 | 0.40311 | BBB- |
| NPRL 783 | 0.75049 | BBB+ |
| NPRL 784 | 0.96435 | BBB+ |
| NPRL 785 | 0.10606 | BBB- |
| NPRL 786 | 0.54141 | BBB+ |
| NPRL 787 | 0.01746 | BBB- |
| NPRL 788 | 0.73250 | BBB+ |
| NPRL 789 | 0.62937 | BBB+ |
| NPRL 79  | 0.46358 | BBB- |
| NPRL 791 | 0.24231 | BBB- |
| NPRL 792 | 0.05680 | BBB- |
| NPRL 793 | 0.96249 | BBB+ |
| NPRL 794 | 0.89994 | BBB+ |
| NPRL 795 | 0.02379 | BBB- |
| NPRL 796 | 0.87027 | BBB+ |
| NPRL 797 | 0.03370 | BBB- |
| NPRL 799 | 0.02771 | BBB- |
| NPRL 8   | 0.63254 | BBB+ |
| NPRL 80  | 0.32961 | BBB- |
| NPRL 801 | 0.03655 | BBB- |
| NPRL 802 | 0.72222 | BBB+ |
| NPRL 803 | 0.90938 | BBB+ |

|          |         |      |
|----------|---------|------|
| NPRL 804 | 0.04533 | BBB- |
| NPRL 805 | 0.03809 | BBB- |
| NPRL 806 | 0.92527 | BBB+ |
| NPRL 807 | 0.00032 | BBB- |
| NPRL 808 | 0.79971 | BBB+ |
| NPRL 809 | 0.00977 | BBB- |
| NPRL 811 | 0.06711 | BBB- |
| NPRL 814 | 0.11015 | BBB- |
| NPRL 815 | 0.99629 | BBB+ |
| NPRL 816 | 0.96095 | BBB+ |
| NPRL 817 | 0.92930 | BBB+ |
| NPRL 818 | 0.99886 | BBB+ |
| NPRL 819 | 0.98123 | BBB+ |
| NPRL 82  | 0.96210 | BBB+ |
| NPRL 820 | 0.99892 | BBB+ |
| NPRL 821 | 0.78462 | BBB+ |
| NPRL 822 | 0.52142 | BBB+ |
| NPRL 823 | 0.21742 | BBB- |
| NPRL 824 | 0.67401 | BBB+ |
| NPRL 825 | 0.82097 | BBB+ |
| NPRL 826 | 0.92848 | BBB+ |
| NPRL 827 | 0.82702 | BBB+ |
| NPRL 828 | 0.99455 | BBB+ |
| NPRL 829 | 0.42581 | BBB- |
| NPRL 830 | 0.91061 | BBB+ |
| NPRL 831 | 0.95677 | BBB+ |
| NPRL 832 | 0.73435 | BBB+ |
| NPRL 833 | 0.99891 | BBB+ |
| NPRL 834 | 0.98965 | BBB+ |
| NPRL 835 | 0.99959 | BBB+ |
| NPRL 836 | 0.99553 | BBB+ |
| NPRL 837 | 0.95727 | BBB+ |
| NPRL 838 | 0.97689 | BBB+ |
| NPRL 839 | 0.99610 | BBB+ |
| NPRL 840 | 0.74353 | BBB+ |
| NPRL 841 | 0.98627 | BBB+ |
| NPRL 842 | 0.99637 | BBB+ |
| NPRL 843 | 0.80184 | BBB+ |
| NPRL 844 | 0.84706 | BBB+ |
| NPRL 845 | 0.88430 | BBB+ |
| NPRL 846 | 0.58077 | BBB+ |
| NPRL 847 | 0.83733 | BBB+ |
| NPRL 848 | 0.00271 | BBB- |
| NPRL 849 | 0.00130 | BBB- |
| NPRL 85  | 0.22174 | BBB- |
| NPRL 850 | 0.00820 | BBB- |
| NPRL 851 | 0.35596 | BBB- |
| NPRL 853 | 0.51897 | BBB+ |
| NPRL 854 | 0.99250 | BBB+ |
| NPRL 855 | 0.99647 | BBB+ |
| NPRL 856 | 0.98557 | BBB+ |
| NPRL 857 | 0.05889 | BBB- |
| NPRL 859 | 0.21515 | BBB- |
| NPRL 860 | 0.85022 | BBB+ |
| NPRL 861 | 0.62612 | BBB+ |
| NPRL 862 | 0.31818 | BBB- |
| NPRL 863 | 0.28881 | BBB- |

|          |         |      |
|----------|---------|------|
| NPRL 864 | 0.97219 | BBB+ |
| NPRL 865 | 0.98573 | BBB+ |
| NPRL 866 | 0.97120 | BBB+ |
| NPRL 867 | 0.99307 | BBB+ |
| NPRL 868 | 0.81801 | BBB+ |
| NPRL 869 | 0.94434 | BBB+ |
| NPRL 87  | 0.89297 | BBB+ |
| NPRL 870 | 0.90658 | BBB+ |
| NPRL 871 | 0.52002 | BBB+ |
| NPRL 872 | 0.99464 | BBB+ |
| NPRL 873 | 0.92762 | BBB+ |
| NPRL 874 | 0.99315 | BBB+ |
| NPRL 875 | 0.58603 | BBB+ |
| NPRL 876 | 0.58044 | BBB+ |
| NPRL 877 | 0.91218 | BBB+ |
| NPRL 88  | 0.97093 | BBB+ |
| NPRL 89  | 0.85746 | BBB+ |
| NPRL 9   | 0.98110 | BBB+ |
| NPRL 91  | 0.87978 | BBB+ |
| NPRL 95  | 0.39881 | BBB- |
| NPRL 96  | 0.95330 | BBB+ |
| NPRL 97  | 0.19011 | BBB- |
| NPRL 98  | 0.47031 | BBB- |
| NPRL 99  | 0.99135 | BBB+ |
| NPRL1000 | 0.99205 | BBB+ |
| NPRL1001 | 0.02501 | BBB- |
| NPRL1002 | 0.00339 | BBB- |
| NPRL1003 | 0.07381 | BBB- |
| NPRL1004 | 0.21468 | BBB- |
| NPRL1005 | 0.92094 | BBB+ |
| NPRL1006 | 0.00523 | BBB- |
| NPRL1007 | 0.00242 | BBB- |
| NPRL1008 | 0.03609 | BBB- |
| NPRL1009 | 0.97744 | BBB+ |
| NPRL1010 | 0.00366 | BBB- |
| NPRL1011 | 0.00439 | BBB- |
| NPRL1012 | 0.98796 | BBB+ |
| NPRL1013 | 0.95478 | BBB+ |
| NPRL1014 | 0.00647 | BBB- |
| NPRL1015 | 0.00144 | BBB- |
| NPRL1016 | 0.00837 | BBB- |
| NPRL1017 | 0.98565 | BBB+ |
| NPRL1018 | 0.34240 | BBB- |
| NPRL1019 | 0.86697 | BBB+ |
| NPRL1020 | 0.88369 | BBB+ |
| NPRL1021 | 0.53153 | BBB+ |
| NPRL1022 | 0.98892 | BBB+ |
| NPRL1023 | 0.92729 | BBB+ |
| NPRL1024 | 0.96803 | BBB+ |
| NPRL1026 | 0.00896 | BBB- |
| NPRL1027 | 0.99285 | BBB+ |
| NPRL1028 | 0.00138 | BBB- |
| NPRL1029 | 0.99813 | BBB+ |
| NPRL1030 | 0.00472 | BBB- |
| NPRL1031 | 0.00580 | BBB- |
| NPRL1032 | 0.04151 | BBB- |
| NPRL1033 | 0.00510 | BBB- |

|          |         |      |
|----------|---------|------|
| NPRL1034 | 0.00398 | BBB- |
| NPRL1035 | 0.01921 | BBB- |
| NPRL1036 | 0.01592 | BBB- |
| NPRL1037 | 0.00101 | BBB- |
| NPRL1038 | 0.01173 | BBB- |
| NPRL1039 | 0.00202 | BBB- |
| NPRL1040 | 0.82171 | BBB+ |
| NPRL1041 | 0.24051 | BBB- |
| NPRL1042 | 0.97124 | BBB+ |
| NPRL1043 | 0.80158 | BBB+ |
| NPRL1044 | 0.05362 | BBB- |
| NPRL1045 | 0.00891 | BBB- |
| NPRL1046 | 0.07905 | BBB- |
| NPRL1047 | 0.90314 | BBB+ |
| NPRL1052 | 0.73315 | BBB+ |
| NPRL1055 | 0.02941 | BBB- |
| NPRL1056 | 0.00096 | BBB- |
| NPRL1058 | 0.87780 | BBB+ |
| NPRL1059 | 0.97394 | BBB+ |
| NPRL1060 | 0.26941 | BBB- |
| NPRL1061 | 0.11576 | BBB- |
| NPRL1062 | 0.28526 | BBB- |
| NPRL1067 | 0.94537 | BBB+ |
| NPRL1068 | 0.69431 | BBB+ |
| NPRL1069 | 0.52963 | BBB+ |
| NPRL1071 | 0.74057 | BBB+ |
| NPRL1072 | 0.96773 | BBB+ |
| NPRL1073 | 0.05071 | BBB- |
| NPRL1076 | 0.99053 | BBB+ |
| NPRL1083 | 0.45814 | BBB- |
| NPRL1084 | 0.40052 | BBB- |
| NPRL1085 | 0.00184 | BBB- |
| NPRL1086 | 0.96743 | BBB+ |
| NPRL1087 | 0.82605 | BBB+ |
| NPRL1088 | 0.00493 | BBB- |
| NPRL1089 | 0.99921 | BBB+ |
| NPRL1090 | 0.99704 | BBB+ |
| NPRL1092 | 0.90469 | BBB+ |
| NPRL1093 | 0.98444 | BBB+ |
| NPRL1094 | 0.01857 | BBB- |
| NPRL1096 | 0.73585 | BBB+ |
| NPRL1098 | 0.77756 | BBB+ |
| NPRL1099 | 0.36928 | BBB- |
| NPRL1101 | 0.69443 | BBB+ |
| NPRL1103 | 0.87540 | BBB+ |
| NPRL1104 | 0.53069 | BBB+ |
| NPRL1105 | 0.41243 | BBB- |
| NPRL1106 | 0.90012 | BBB+ |
| NPRL1107 | 0.74640 | BBB+ |
| NPRL1109 | 0.00252 | BBB- |
| NPRL1110 | 0.93114 | BBB+ |
| NPRL1111 | 0.66294 | BBB+ |
| NPRL1112 | 0.00533 | BBB- |
| NPRL1113 | 0.00412 | BBB- |
| NPRL1114 | 0.99635 | BBB+ |
| NPRL1115 | 0.88191 | BBB+ |
| NPRL1116 | 0.90661 | BBB+ |

|          |         |      |
|----------|---------|------|
| NPRL1118 | 0.92321 | BBB+ |
| NPRL1119 | 0.98120 | BBB+ |
| NPRL1120 | 0.94468 | BBB+ |
| NPRL1121 | 0.85535 | BBB+ |
| NPRL1122 | 0.83085 | BBB+ |
| NPRL1124 | 0.95159 | BBB+ |
| NPRL1125 | 0.88880 | BBB+ |
| NPRL1127 | 0.90654 | BBB+ |
| NPRL1128 | 0.83918 | BBB+ |
| NPRL1129 | 0.91268 | BBB+ |
| NPRL1130 | 0.71323 | BBB+ |
| NPRL1131 | 0.92931 | BBB+ |
| NPRL1132 | 0.00067 | BBB- |
| NPRL1133 | 0.91636 | BBB+ |
| NPRL1134 | 0.72366 | BBB+ |
| NPRL1135 | 0.81118 | BBB+ |
| NPRL1136 | 0.74748 | BBB+ |
| NPRL1137 | 0.96419 | BBB+ |
| NPRL1142 | 0.91284 | BBB+ |
| NPRL1143 | 0.06561 | BBB- |
| NPRL1144 | 0.91215 | BBB+ |
| NPRL1145 | 0.83182 | BBB+ |
| NPRL1146 | 0.30954 | BBB- |
| NPRL1147 | 0.67583 | BBB+ |
| NPRL1149 | 0.88456 | BBB+ |
| NPRL1150 | 0.86176 | BBB+ |
| NPRL1151 | 0.68517 | BBB+ |
| NPRL1152 | 0.70880 | BBB+ |
| NPRL1153 | 0.38114 | BBB- |
| NPRL1157 | 0.54708 | BBB+ |
| NPRL1159 | 0.77672 | BBB+ |
| NPRL1160 | 0.86777 | BBB+ |
| NPRL1161 | 0.80768 | BBB+ |
| NPRL1162 | 0.92632 | BBB+ |
| NPRL1163 | 0.22877 | BBB- |
| NPRL1165 | 0.83152 | BBB+ |
| NPRL1168 | 0.53828 | BBB+ |
| NPRL1169 | 0.83055 | BBB+ |
| NPRL1171 | 0.28044 | BBB- |
| NPRL1173 | 0.70641 | BBB+ |
| NPRL1175 | 0.50480 | BBB+ |
| NPRL1176 | 0.96905 | BBB+ |
| NPRL1177 | 0.96518 | BBB+ |
| NPRL1178 | 0.96689 | BBB+ |
| NPRL1179 | 0.75674 | BBB+ |
| NPRL1180 | 0.99334 | BBB+ |
| NPRL1181 | 0.99158 | BBB+ |
| NPRL1182 | 0.98789 | BBB+ |
| NPRL1183 | 0.98018 | BBB+ |
| NPRL1184 | 0.81023 | BBB+ |
| NPRL1185 | 0.99958 | BBB+ |
| NPRL1186 | 0.99789 | BBB+ |
| NPRL1187 | 0.85615 | BBB+ |
| NPRL1188 | 0.99738 | BBB+ |
| NPRL1189 | 0.99062 | BBB+ |
| NPRL1190 | 0.99308 | BBB+ |
| NPRL1191 | 0.97403 | BBB+ |



|          |         |      |
|----------|---------|------|
| NPRL1192 | 0.99232 | BBB+ |
| NPRL1193 | 0.99185 | BBB+ |
| NPRL1194 | 0.94135 | BBB+ |
| NPRL1195 | 0.99897 | BBB+ |
| NPRL1196 | 0.99057 | BBB+ |
| NPRL1197 | 0.93861 | BBB+ |
| NPRL1198 | 0.61676 | BBB+ |
| NPRL1199 | 0.98061 | BBB+ |
| NPRL1200 | 0.92886 | BBB+ |
| NPRL1201 | 0.94887 | BBB+ |
| NPRL1202 | 0.94941 | BBB+ |
| NPRL1203 | 0.96705 | BBB+ |
| NPRL1204 | 0.47390 | BBB- |
| NPRL1205 | 0.95406 | BBB+ |
| NPRL1207 | 0.91485 | BBB+ |
| NPRL1208 | 0.34167 | BBB- |
| NPRL1209 | 0.97234 | BBB+ |
| NPRL1210 | 0.94643 | BBB+ |
| NPRL1211 | 0.97725 | BBB+ |
| NPRL1212 | 0.75503 | BBB+ |
| NPRL1213 | 0.97527 | BBB+ |
| NPRL1214 | 0.98623 | BBB+ |
| NPRL1215 | 0.21503 | BBB- |
| NPRL1216 | 0.92463 | BBB+ |
| NPRL1217 | 0.25814 | BBB- |
| NPRL1218 | 0.97211 | BBB+ |
| NPRL1222 | 0.96651 | BBB+ |
| NPRL1223 | 0.99394 | BBB+ |
| NPRL1224 | 0.90447 | BBB+ |
| NPRL1225 | 0.84817 | BBB+ |
| NPRL1226 | 0.93390 | BBB+ |
| NPRL1228 | 0.47829 | BBB- |
| NPRL1229 | 0.76117 | BBB+ |
| NPRL1232 | 0.90689 | BBB+ |
| NPRL1235 | 0.98701 | BBB+ |
| NPRL1237 | 0.33356 | BBB- |
| NPRL1238 | 0.94945 | BBB+ |
| NPRL1239 | 0.99645 | BBB+ |
| NPRL1240 | 0.98162 | BBB+ |
| NPRL1241 | 0.99599 | BBB+ |
| NPRL1242 | 0.97461 | BBB+ |
| NPRL1243 | 0.99100 | BBB+ |
| NPRL1244 | 0.99741 | BBB+ |
| NPRL1245 | 0.30118 | BBB- |
| NPRL1247 | 0.95724 | BBB+ |
| NPRL1250 | 0.86318 | BBB+ |
| NPRL1251 | 0.99853 | BBB+ |
| NPRL1252 | 0.99863 | BBB+ |
| NPRL1253 | 0.42480 | BBB- |
| NPRL1254 | 0.95699 | BBB+ |
| NPRL1255 | 0.97432 | BBB+ |
| NPRL1259 | 0.96084 | BBB+ |
| NPRL1260 | 0.59242 | BBB+ |
| NPRL1261 | 0.87608 | BBB+ |
| NPRL1262 | 0.87206 | BBB+ |
| NPRL1263 | 0.97567 | BBB+ |
| NPRL1264 | 0.96762 | BBB+ |

|          |         |      |
|----------|---------|------|
| NPRL1265 | 0.10661 | BBB- |
| NPRL1266 | 0.18441 | BBB- |
| NPRL1267 | 0.16089 | BBB- |
| NPRL1268 | 0.74246 | BBB+ |
| NPRL1270 | 0.27552 | BBB- |
| NPRL1271 | 0.51298 | BBB+ |
| NPRL1272 | 0.83107 | BBB+ |
| NPRL1273 | 0.85799 | BBB+ |
| NPRL1275 | 0.86132 | BBB+ |
| NPRL1277 | 0.58319 | BBB+ |
| NPRL1278 | 0.20165 | BBB- |
| NPRL1280 | 0.56755 | BBB+ |
| NPRL1281 | 0.28449 | BBB- |
| NPRL1282 | 0.02786 | BBB- |
| NPRL1284 | 0.04319 | BBB- |
| NPRL1285 | 0.01935 | BBB- |
| NPRL1286 | 0.20250 | BBB- |
| NPRL1287 | 0.72378 | BBB+ |
| NPRL1288 | 0.88251 | BBB+ |
| NPRL1289 | 0.91489 | BBB+ |
| NPRL1290 | 0.08748 | BBB- |
| NPRL1292 | 0.93426 | BBB+ |
| NPRL1294 | 0.76440 | BBB+ |
| NPRL1295 | 0.64928 | BBB+ |
| NPRL1296 | 0.08439 | BBB- |
| NPRL1297 | 0.07110 | BBB- |
| NPRL1299 | 0.99201 | BBB+ |
| NPRL1300 | 0.99249 | BBB+ |
| NPRL1301 | 0.97329 | BBB+ |
| NPRL1302 | 0.35672 | BBB- |
| NPRL1303 | 0.94540 | BBB+ |
| NPRL1305 | 0.37709 | BBB- |
| NPRL1306 | 0.89450 | BBB+ |
| NPRL1307 | 0.89445 | BBB+ |
| NPRL1309 | 0.97202 | BBB+ |
| NPRL1310 | 0.93855 | BBB+ |
| NPRL1311 | 0.68064 | BBB+ |
| NPRL1312 | 0.28251 | BBB- |
| NPRL1313 | 0.98569 | BBB+ |
| NPRL1314 | 0.69732 | BBB+ |
| NPRL1315 | 0.92094 | BBB+ |
| NPRL1316 | 0.52896 | BBB+ |
| NPRL1317 | 0.68590 | BBB+ |
| NPRL1320 | 0.14953 | BBB- |
| NPRL1322 | 0.68722 | BBB+ |
| NPRL1323 | 0.26020 | BBB- |
| NPRL1325 | 0.09975 | BBB- |
| NPRL1326 | 0.94016 | BBB+ |
| NPRL1327 | 0.44982 | BBB- |
| NPRL1328 | 0.60054 | BBB+ |
| NPRL1329 | 0.34718 | BBB- |
| NPRL1330 | 0.66135 | BBB+ |
| NPRL1331 | 0.76007 | BBB+ |
| NPRL1334 | 0.67964 | BBB+ |
| NPRL1335 | 0.98290 | BBB+ |
| NPRL1336 | 0.98863 | BBB+ |
| NPRL1337 | 0.68695 | BBB+ |

|          |         |      |
|----------|---------|------|
| NPRL1339 | 0.78362 | BBB+ |
| NPRL1340 | 0.67355 | BBB+ |
| NPRL1341 | 0.63432 | BBB+ |
| NPRL1342 | 0.66318 | BBB+ |
| NPRL1343 | 0.59732 | BBB+ |
| NPRL1344 | 0.55805 | BBB+ |
| NPRL1346 | 0.95703 | BBB+ |
| NPRL1347 | 0.15278 | BBB- |
| NPRL1348 | 0.29579 | BBB- |
| NPRL1349 | 0.37376 | BBB- |
| NPRL1350 | 0.21295 | BBB- |
| NPRL1351 | 0.49913 | BBB- |
| NPRL1352 | 0.68262 | BBB+ |
| NPRL1353 | 0.64855 | BBB+ |
| NPRL1354 | 0.25881 | BBB- |
| NPRL1355 | 0.98047 | BBB+ |
| NPRL1356 | 0.82138 | BBB+ |
| NPRL1357 | 0.97047 | BBB+ |
| NPRL1358 | 0.99054 | BBB+ |
| NPRL1359 | 0.95452 | BBB+ |
| NPRL1360 | 0.34489 | BBB- |
| NPRL1361 | 0.31063 | BBB- |
| NPRL1362 | 0.98083 | BBB+ |
| NPRL1363 | 0.73332 | BBB+ |
| NPRL1364 | 0.21942 | BBB- |
| NPRL1365 | 0.13690 | BBB- |
| NPRL1366 | 0.53626 | BBB+ |
| NPRL1367 | 0.97273 | BBB+ |
| NPRL1368 | 0.80756 | BBB+ |
| NPRL1369 | 0.48965 | BBB- |
| NPRL1370 | 0.59241 | BBB+ |
| NPRL1371 | 0.50793 | BBB+ |
| NPRL1372 | 0.93603 | BBB+ |
| NPRL1373 | 0.94682 | BBB+ |
| NPRL1374 | 0.34934 | BBB- |
| NPRL1375 | 0.53500 | BBB+ |
| NPRL1377 | 0.91530 | BBB+ |
| NPRL1378 | 0.91376 | BBB+ |
| NPRL1379 | 0.20332 | BBB- |
| NPRL1381 | 0.23427 | BBB- |
| NPRL1382 | 0.01477 | BBB- |
| NPRL1383 | 0.91091 | BBB+ |
| NPRL1384 | 0.76915 | BBB+ |
| NPRL1386 | 0.67533 | BBB+ |
| NPRL1388 | 0.11922 | BBB- |
| NPRL1391 | 0.97442 | BBB+ |
| NPRL1392 | 0.95706 | BBB+ |
| NPRL1393 | 0.96202 | BBB+ |
| NPRL1394 | 0.85569 | BBB+ |
| NPRL1396 | 0.98688 | BBB+ |
| NPRL1397 | 0.98583 | BBB+ |
| NPRL1398 | 0.76804 | BBB+ |
| NPRL1399 | 0.94980 | BBB+ |
| NPRL1400 | 0.91561 | BBB+ |
| NPRL1401 | 0.03562 | BBB- |
| NPRL1402 | 0.44861 | BBB- |
| NPRL1404 | 0.62977 | BBB+ |

|          |         |      |
|----------|---------|------|
| NPRL1405 | 0.99699 | BBB+ |
| NPRL1406 | 0.53469 | BBB+ |
| NPRL1407 | 0.12443 | BBB- |
| NPRL1408 | 0.08867 | BBB- |
| NPRL1409 | 0.96114 | BBB+ |
| NPRL1410 | 0.95902 | BBB+ |
| NPRL1411 | 0.18238 | BBB- |
| NPRL1412 | 0.96857 | BBB+ |
| NPRL1415 | 0.94522 | BBB+ |
| NPRL1416 | 0.02897 | BBB- |
| NPRL1417 | 0.90825 | BBB+ |
| NPRL1419 | 0.96201 | BBB+ |
| NPRL1420 | 0.84907 | BBB+ |
| NPRL1421 | 0.93695 | BBB+ |
| NPRL1422 | 0.89335 | BBB+ |
| NPRL1423 | 0.49062 | BBB- |
| NPRL1424 | 0.00202 | BBB- |
| NPRL1425 | 0.06800 | BBB- |
| NPRL1426 | 0.03222 | BBB- |
| NPRL1427 | 0.10821 | BBB- |
| NPRL1428 | 0.04495 | BBB- |
| NPRL1429 | 0.01772 | BBB- |
| NPRL1430 | 0.02495 | BBB- |
| NPRL1431 | 0.00019 | BBB- |
| NPRL1432 | 0.00064 | BBB- |
| NPRL1433 | 0.00026 | BBB- |
| NPRL1434 | 0.00079 | BBB- |
| NPRL1435 | 0.91649 | BBB+ |
| NPRL1436 | 0.58634 | BBB+ |
| NPRL1437 | 0.02984 | BBB- |
| NPRL1438 | 0.80634 | BBB+ |
| NPRL1439 | 0.96953 | BBB+ |
| NPRL1440 | 0.53983 | BBB+ |
| NPRL1443 | 0.70202 | BBB+ |
| NPRL1444 | 0.15751 | BBB- |
| NPRL1445 | 0.71324 | BBB+ |
| NPRL1446 | 0.58864 | BBB+ |
| NPRL1447 | 0.80173 | BBB+ |
| NPRL1448 | 0.91102 | BBB+ |
| NPRL1449 | 0.99203 | BBB+ |
| NPRL1450 | 0.00228 | BBB- |
| NPRL1451 | 0.32478 | BBB- |
| NPRL1452 | 0.41389 | BBB- |
| NPRL1453 | 0.95391 | BBB+ |
| NPRL1454 | 0.01501 | BBB- |
| NPRL1455 | 0.69783 | BBB+ |
| NPRL1456 | 0.73142 | BBB+ |
| NPRL1457 | 0.84649 | BBB+ |
| NPRL1458 | 0.85683 | BBB+ |
| NPRL1460 | 0.96098 | BBB+ |
| NPRL1462 | 0.99175 | BBB+ |
| NPRL1463 | 0.92656 | BBB+ |
| NPRL1464 | 0.81182 | BBB+ |
| NPRL1465 | 0.32411 | BBB- |
| NPRL1466 | 0.00073 | BBB- |
| NPRL1468 | 0.96892 | BBB+ |
| NPRL1469 | 0.25777 | BBB- |

|          |         |      |
|----------|---------|------|
| NPRL1470 | 0.08633 | BBB- |
| NPRL1471 | 0.99574 | BBB+ |
| NPRL1472 | 0.85446 | BBB+ |
| NPRL1473 | 0.40478 | BBB- |
| NPRL1474 | 0.95412 | BBB+ |
| NPRL1475 | 0.49885 | BBB- |
| NPRL1476 | 0.66447 | BBB+ |
| NPRL1477 | 0.99843 | BBB+ |
| NPRL1478 | 0.99849 | BBB+ |
| NPRL1480 | 0.89807 | BBB+ |
| NPRL1481 | 0.92637 | BBB+ |
| NPRL1482 | 0.09876 | BBB- |
| NPRL1483 | 0.93752 | BBB+ |
| NPRL1484 | 0.00144 | BBB- |
| NPRL1485 | 0.11236 | BBB- |
| NPRL1486 | 0.15501 | BBB- |
| NPRL1487 | 0.00151 | BBB- |
| NPRL1488 | 0.00080 | BBB- |
| NPRL1489 | 0.00056 | BBB- |
| NPRL1490 | 0.33173 | BBB- |
| NPRL1491 | 0.98368 | BBB+ |
| NPRL1492 | 0.94228 | BBB+ |
| NPRL1493 | 0.18411 | BBB- |
| NPRL1494 | 0.31710 | BBB- |
| NPRL1495 | 0.09028 | BBB- |
| NPRL1496 | 0.34590 | BBB- |
| NPRL1497 | 0.30635 | BBB- |
| NPRL1498 | 0.02257 | BBB- |
| NPRL1499 | 0.05224 | BBB- |
| NPRL1500 | 0.99502 | BBB+ |
| NPRL1502 | 0.09261 | BBB- |
| NPRL1503 | 0.00133 | BBB- |
| NPRL1505 | 0.31684 | BBB- |
| NPRL1506 | 0.22786 | BBB- |
| NPRL1507 | 0.07085 | BBB- |
| NPRL1508 | 0.94246 | BBB+ |
| NPRL1509 | 0.92996 | BBB+ |
| NPRL1510 | 0.06664 | BBB- |
| NPRL1511 | 0.99202 | BBB+ |
| NPRL1512 | 0.97142 | BBB+ |
| NPRL1513 | 0.92024 | BBB+ |
| NPRL1514 | 0.50252 | BBB+ |
| NPRL1515 | 0.85918 | BBB+ |
| NPRL1516 | 0.98414 | BBB+ |
| NPRL1517 | 0.00851 | BBB- |
| NPRL1518 | 0.00979 | BBB- |
| NPRL1519 | 0.99556 | BBB+ |
| NPRL1520 | 0.84554 | BBB+ |
| NPRL1521 | 0.97024 | BBB+ |
| NPRL1522 | 0.76382 | BBB+ |
| NPRL1523 | 0.98483 | BBB+ |
| NPRL1524 | 0.71389 | BBB+ |
| NPRL1525 | 0.97966 | BBB+ |
| NPRL1526 | 0.88140 | BBB+ |
| NPRL1528 | 0.02585 | BBB- |
| NPRL1530 | 0.87046 | BBB+ |
| NPRL1531 | 0.53689 | BBB+ |

|          |         |      |
|----------|---------|------|
| NPRL1532 | 0.96190 | BBB+ |
| NPRL1533 | 0.43967 | BBB- |
| NPRL1535 | 0.24790 | BBB- |
| NPRL1536 | 0.71337 | BBB+ |
| NPRL1537 | 0.96879 | BBB+ |
| NPRL1538 | 0.96951 | BBB+ |
| NPRL1539 | 0.96484 | BBB+ |
| NPRL1540 | 0.82549 | BBB+ |
| NPRL1541 | 0.83041 | BBB+ |
| NPRL1542 | 0.98874 | BBB+ |
| NPRL1543 | 0.45556 | BBB- |
| NPRL1544 | 0.90280 | BBB+ |
| NPRL1545 | 0.02280 | BBB- |
| NPRL1546 | 0.70187 | BBB+ |
| NPRL1547 | 0.52462 | BBB+ |
| NPRL1550 | 0.94374 | BBB+ |
| NPRL1551 | 0.67305 | BBB+ |
| NPRL1552 | 0.66344 | BBB+ |
| NPRL1553 | 0.38025 | BBB- |
| NPRL1555 | 0.78875 | BBB+ |
| NPRL1556 | 0.80449 | BBB+ |
| NPRL1557 | 0.88610 | BBB+ |
| NPRL1558 | 0.00356 | BBB- |
| NPRL1559 | 0.99014 | BBB+ |
| NPRL1560 | 0.39366 | BBB- |
| NPRL1561 | 0.57662 | BBB+ |
| NPRL1562 | 0.30970 | BBB- |
| NPRL1563 | 0.40354 | BBB- |
| NPRL1564 | 0.93245 | BBB+ |
| NPRL1565 | 0.49372 | BBB- |
| NPRL1566 | 0.05246 | BBB- |
| NPRL1567 | 0.89437 | BBB+ |
| NPRL1568 | 0.58817 | BBB+ |
| NPRL1569 | 0.19733 | BBB- |
| NPRL1570 | 0.77928 | BBB+ |
| NPRL1571 | 0.06880 | BBB- |
| NPRL1572 | 0.78554 | BBB+ |
| NPRL1573 | 0.99153 | BBB+ |
| NPRL1574 | 0.33805 | BBB- |
| NPRL1577 | 0.09283 | BBB- |
| NPRL1578 | 0.90797 | BBB+ |
| NPRL1579 | 0.07231 | BBB- |
| NPRL1580 | 0.09666 | BBB- |
| NPRL1582 | 0.31891 | BBB- |
| NPRL1583 | 0.36996 | BBB- |
| NPRL1586 | 0.73332 | BBB+ |
| NPRL1589 | 0.81355 | BBB+ |
| NPRL1590 | 0.21660 | BBB- |
| NPRL1593 | 0.48680 | BBB- |
| NPRL1594 | 0.32372 | BBB- |
| NPRL1595 | 0.79531 | BBB+ |
| NPRL1596 | 0.01404 | BBB- |
| NPRL1597 | 0.65193 | BBB+ |
| NPRL1598 | 0.33717 | BBB- |
| NPRL1599 | 0.97611 | BBB+ |
| NPRL1601 | 0.96521 | BBB+ |
| NPRL1602 | 0.81391 | BBB+ |

|          |         |      |
|----------|---------|------|
| NPRL1603 | 0.01170 | BBB- |
| NPRL1604 | 0.44816 | BBB- |
| NPRL1606 | 0.61063 | BBB+ |
| NPRL1607 | 0.84461 | BBB+ |
| NPRL1609 | 0.14734 | BBB- |
| NPRL1614 | 0.91533 | BBB+ |
| NPRL1616 | 0.94433 | BBB+ |
| NPRL1618 | 0.35597 | BBB- |
| NPRL1620 | 0.71284 | BBB+ |
| NPRL1623 | 0.21470 | BBB- |
| NPRL1625 | 0.60014 | BBB+ |
| NPRL1627 | 0.04892 | BBB- |
| NPRL1628 | 0.16366 | BBB- |
| NPRL1629 | 0.79716 | BBB+ |
| NPRL1630 | 0.05165 | BBB- |
| NPRL1633 | 0.89241 | BBB+ |
| NPRL1636 | 0.68620 | BBB+ |
| NPRL1637 | 0.05751 | BBB- |
| NPRL1639 | 0.09765 | BBB- |
| NPRL1640 | 0.76155 | BBB+ |
| NPRL1641 | 0.06110 | BBB- |
| NPRL1642 | 0.07846 | BBB- |
| NPRL1643 | 0.52085 | BBB+ |
| NPRL1644 | 0.77020 | BBB+ |
| NPRL1646 | 0.75853 | BBB+ |
| NPRL1649 | 0.94504 | BBB+ |
| NPRL1651 | 0.83577 | BBB+ |
| NPRL1653 | 0.82614 | BBB+ |
| NPRL1657 | 0.70495 | BBB+ |
| NPRL1658 | 0.82269 | BBB+ |
| NPRL1659 | 0.60567 | BBB+ |
| NPRL1660 | 0.36843 | BBB- |
| NPRL1661 | 0.07090 | BBB- |
| NPRL1662 | 0.06422 | BBB- |
| NPRL1663 | 0.20722 | BBB- |
| NPRL1664 | 0.35589 | BBB- |
| NPRL1665 | 0.63208 | BBB+ |
| NPRL1666 | 0.98351 | BBB+ |
| NPRL1667 | 0.68837 | BBB+ |
| NPRL1668 | 0.93408 | BBB+ |
| NPRL1669 | 0.48150 | BBB- |
| NPRL1670 | 0.23653 | BBB- |
| NPRL1671 | 0.33629 | BBB- |
| NPRL1672 | 0.16344 | BBB- |
| NPRL1673 | 0.14767 | BBB- |
| NPRL1674 | 0.03223 | BBB- |
| NPRL1675 | 0.09728 | BBB- |
| NPRL1676 | 0.13105 | BBB- |
| NPRL1677 | 0.08539 | BBB- |
| NPRL1678 | 0.47747 | BBB- |
| NPRL1679 | 0.45755 | BBB- |
| NPRL1680 | 0.34027 | BBB- |
| NPRL1681 | 0.04000 | BBB- |
| NPRL1682 | 0.16096 | BBB- |
| NPRL1683 | 0.20318 | BBB- |
| NPRL1684 | 0.76347 | BBB+ |
| NPRL1685 | 0.34642 | BBB- |

|          |         |      |
|----------|---------|------|
| NPRL1686 | 0.05806 | BBB- |
| NPRL1687 | 0.00354 | BBB- |
| NPRL1688 | 0.28569 | BBB- |
| NPRL1689 | 0.60748 | BBB+ |
| NPRL1690 | 0.15988 | BBB- |
| NPRL1691 | 0.08867 | BBB- |
| NPRL1692 | 0.01144 | BBB- |
| NPRL1693 | 0.01904 | BBB- |
| NPRL1694 | 0.04830 | BBB- |
| NPRL1695 | 0.01442 | BBB- |
| NPRL1696 | 0.25476 | BBB- |
| NPRL1697 | 0.13772 | BBB- |
| NPRL1698 | 0.92528 | BBB+ |
| NPRL1699 | 0.35795 | BBB- |
| NPRL1700 | 0.03112 | BBB- |
| NPRL1701 | 0.02070 | BBB- |
| NPRL1702 | 0.16091 | BBB- |
| NPRL1703 | 0.08076 | BBB- |
| NPRL1704 | 0.00611 | BBB- |
| NPRL1705 | 0.25910 | BBB- |
| NPRL1706 | 0.22185 | BBB- |
| NPRL1711 | 0.06059 | BBB- |
| NPRL1712 | 0.09316 | BBB- |
| NPRL1713 | 0.09025 | BBB- |
| NPRL1716 | 0.12663 | BBB- |
| NPRL1717 | 0.06110 | BBB- |
| NPRL1718 | 0.02307 | BBB- |
| NPRL1719 | 0.02182 | BBB- |
| NPRL1720 | 0.06213 | BBB- |
| NPRL1721 | 0.24486 | BBB- |
| NPRL1722 | 0.08093 | BBB- |
| NPRL1723 | 0.22623 | BBB- |
| NPRL1724 | 0.73133 | BBB+ |
| NPRL1725 | 0.12380 | BBB- |
| NPRL1726 | 0.11842 | BBB- |
| NPRL1727 | 0.01032 | BBB- |
| NPRL1728 | 0.18874 | BBB- |
| NPRL1729 | 0.16330 | BBB- |
| NPRL1730 | 0.04757 | BBB- |
| NPRL1731 | 0.15797 | BBB- |
| NPRL1732 | 0.03521 | BBB- |
| NPRL1733 | 0.00466 | BBB- |
| NPRL1734 | 0.01949 | BBB- |
| NPRL1735 | 0.12295 | BBB- |
| NPRL1736 | 0.02862 | BBB- |
| NPRL1737 | 0.06315 | BBB- |
| NPRL1738 | 0.12691 | BBB- |
| NPRL1739 | 0.02982 | BBB- |
| NPRL1740 | 0.02030 | BBB- |
| NPRL1741 | 0.02952 | BBB- |
| NPRL1742 | 0.02713 | BBB- |
| NPRL1743 | 0.76373 | BBB+ |
| NPRL1744 | 0.53373 | BBB+ |
| NPRL1748 | 0.08409 | BBB- |
| NPRL1751 | 0.00419 | BBB- |
| NPRL1752 | 0.01065 | BBB- |
| NPRL1753 | 0.44890 | BBB- |



|          |         |      |
|----------|---------|------|
| NPRL1754 | 0.32619 | BBB- |
| NPRL1755 | 0.15896 | BBB- |
| NPRL1756 | 0.23633 | BBB- |
| NPRL1757 | 0.23513 | BBB- |
| NPRL1758 | 0.05873 | BBB- |
| NPRL1759 | 0.03395 | BBB- |
| NPRL1760 | 0.14533 | BBB- |
| NPRL1761 | 0.41075 | BBB- |
| NPRL1762 | 0.18653 | BBB- |
| NPRL1763 | 0.21196 | BBB- |
| NPRL1764 | 0.01007 | BBB- |
| NPRL1765 | 0.82419 | BBB+ |
| NPRL1766 | 0.01911 | BBB- |
| NPRL1767 | 0.04059 | BBB- |
| NPRL1768 | 0.03084 | BBB- |
| NPRL1769 | 0.01037 | BBB- |
| NPRL1770 | 0.01826 | BBB- |
| NPRL1771 | 0.30730 | BBB- |
| NPRL1772 | 0.00226 | BBB- |
| NPRL1773 | 0.01578 | BBB- |
| NPRL1774 | 0.00264 | BBB- |
| NPRL1775 | 0.01489 | BBB- |
| NPRL1776 | 0.00291 | BBB- |
| NPRL1777 | 0.00877 | BBB- |
| NPRL1778 | 0.01433 | BBB- |
| NPRL1779 | 0.19552 | BBB- |
| NPRL1780 | 0.11626 | BBB- |
| NPRL1781 | 0.01077 | BBB- |
| NPRL1782 | 0.01828 | BBB- |
| NPRL1783 | 0.00062 | BBB- |
| NPRL1784 | 0.00020 | BBB- |
| NPRL1785 | 0.00070 | BBB- |
| NPRL1786 | 0.00009 | BBB- |
| NPRL1787 | 0.00371 | BBB- |
| NPRL1788 | 0.00275 | BBB- |
| NPRL1789 | 0.00023 | BBB- |
| NPRL1790 | 0.00098 | BBB- |
| NPRL1791 | 0.37218 | BBB- |
| NPRL1792 | 0.57573 | BBB+ |
| NPRL1793 | 0.32252 | BBB- |
| NPRL1794 | 0.31052 | BBB- |
| NPRL1795 | 0.06895 | BBB- |
| NPRL1796 | 0.03361 | BBB- |
| NPRL1797 | 0.00006 | BBB- |
| NPRL1798 | 0.00002 | BBB- |
| NPRL1799 | 0.51544 | BBB+ |
| NPRL1800 | 0.36244 | BBB- |
| NPRL1801 | 0.80148 | BBB+ |
| NPRL1802 | 0.97030 | BBB+ |
| NPRL1803 | 0.95864 | BBB+ |
| NPRL1804 | 0.82353 | BBB+ |
| NPRL1805 | 0.95361 | BBB+ |
| NPRL1806 | 0.92331 | BBB+ |
| NPRL1807 | 0.00053 | BBB- |
| NPRL1808 | 0.00242 | BBB- |
| NPRL1809 | 0.65096 | BBB+ |
| NPRL1810 | 0.93325 | BBB+ |

|          |         |      |
|----------|---------|------|
| NPRL1811 | 0.66009 | BBB+ |
| NPRL1812 | 0.76653 | BBB+ |
| NPRL2208 | 0.78130 | BBB+ |
| NPRL2209 | 0.14413 | BBB- |
| NPRL2210 | 0.98993 | BBB+ |
| NPRL2211 | 0.96324 | BBB+ |
| NPRL2212 | 0.95821 | BBB+ |
| NPRL2213 | 0.87960 | BBB+ |
| NPRL2214 | 0.98110 | BBB+ |
| NPRL2215 | 0.54430 | BBB+ |
| NPRL2216 | 0.79410 | BBB+ |
| NPRL2217 | 0.96519 | BBB+ |
| NPRL2218 | 0.51827 | BBB+ |
| NPRL2219 | 0.52689 | BBB+ |
| NPRL2220 | 0.00260 | BBB- |
| NPRL2221 | 0.03699 | BBB- |
| NPRL2222 | 0.11771 | BBB- |
| NPRL2223 | 0.03911 | BBB- |
| NPRL2224 | 0.24975 | BBB- |
| NPRL2225 | 0.08389 | BBB- |
| NPRL2226 | 0.00872 | BBB- |
| NPRL2227 | 0.01475 | BBB- |
| NPRL2228 | 0.18832 | BBB- |
| NPRL2229 | 0.03359 | BBB- |
| NPRL2230 | 0.25686 | BBB- |
| NPRL2231 | 0.23614 | BBB- |
| NPRL2232 | 0.34377 | BBB- |
| NPRL2233 | 0.26122 | BBB- |
| NPRL2234 | 0.00437 | BBB- |
| NPRL2235 | 0.49136 | BBB- |
| NPRL2236 | 0.41426 | BBB- |
| NPRL2237 | 0.78724 | BBB+ |
| NPRL2238 | 0.70129 | BBB+ |
| NPRL2239 | 0.16578 | BBB- |
| NPRL2240 | 0.48802 | BBB- |
| NPRL2241 | 0.13881 | BBB- |
| NPRL2242 | 0.28455 | BBB- |
| NPRL2243 | 0.98180 | BBB+ |
| NPRL2244 | 0.02950 | BBB- |
| NPRL2245 | 0.70664 | BBB+ |
| NPRL2246 | 0.41692 | BBB- |
| NPRL2247 | 0.10568 | BBB- |
| NPRL2248 | 0.14243 | BBB- |
| NPRL2249 | 0.33843 | BBB- |
| NPRL2250 | 0.04951 | BBB- |
| NPRL2251 | 0.01119 | BBB- |
| NPRL2252 | 0.22395 | BBB- |
| NPRL2253 | 0.40486 | BBB- |
| NPRL2254 | 0.29344 | BBB- |
| NPRL2255 | 0.24124 | BBB- |
| NPRL2256 | 0.26949 | BBB- |
| NPRL2257 | 0.99208 | BBB+ |
| NPRL2258 | 0.95999 | BBB+ |
| NPRL2259 | 0.03501 | BBB- |
| NPRL2260 | 0.99286 | BBB+ |
| NPRL2261 | 0.31305 | BBB- |
| NPRL2262 | 0.55133 | BBB+ |

|          |         |      |
|----------|---------|------|
| NPRL2263 | 0.02454 | BBB- |
| NPRL2266 | 0.44990 | BBB- |
| NPRL2267 | 0.99568 | BBB+ |
| NPRL2268 | 0.80197 | BBB+ |
| NPRL2269 | 0.63495 | BBB+ |
| NPRL2270 | 0.43431 | BBB- |
| NPRL2271 | 0.99981 | BBB+ |
| NPRL2272 | 0.90074 | BBB+ |
| NPRL2273 | 0.46580 | BBB- |
| NPRL2274 | 0.98554 | BBB+ |
| NPRL2275 | 0.00018 | BBB- |
| NPRL2276 | 0.98833 | BBB+ |
| NPRL2277 | 0.35413 | BBB- |
| NPRL2278 | 0.32749 | BBB- |
| NPRL2279 | 0.05433 | BBB- |
| NPRL2280 | 0.08426 | BBB- |
| NPRL2282 | 0.02548 | BBB- |
| NPRL2283 | 0.79280 | BBB+ |
| NPRL2284 | 0.92262 | BBB+ |
| NPRL2285 | 0.47363 | BBB- |
| NPRL2286 | 0.89620 | BBB+ |
| NPRL2287 | 0.60992 | BBB+ |
| NPRL2288 | 0.56445 | BBB+ |
| NPRL2289 | 0.42641 | BBB- |
| NPRL2290 | 0.40504 | BBB- |
| NPRL2291 | 0.99985 | BBB+ |
| NPRL2293 | 0.00632 | BBB- |
| NPRL2294 | 0.19232 | BBB- |
| NPRL2295 | 0.51158 | BBB+ |
| NPRL2296 | 0.94199 | BBB+ |
| NPRL2297 | 0.17266 | BBB- |
| NPRL2298 | 0.00587 | BBB- |
| NPRL2299 | 0.78884 | BBB+ |
| NPRL2300 | 0.98298 | BBB+ |
| NPRL2301 | 0.00032 | BBB- |
| NPRL2302 | 0.72987 | BBB+ |
| NPRL2303 | 0.71365 | BBB+ |
| NPRL2304 | 0.00592 | BBB- |
| NPRL2305 | 0.10944 | BBB- |
| NPRL2306 | 0.53568 | BBB+ |
| NPRL2307 | 0.87744 | BBB+ |
| NPRL2308 | 0.01163 | BBB- |
| NPRL2309 | 0.98495 | BBB+ |
| NPRL2310 | 0.37646 | BBB- |
| NPRL2311 | 0.83982 | BBB+ |
| NPRL2312 | 0.57743 | BBB+ |
| NPRL2313 | 0.92295 | BBB+ |
| NPRL2314 | 0.71474 | BBB+ |
| NPRL2315 | 0.99761 | BBB+ |
| NPRL2316 | 0.96856 | BBB+ |
| NPRL2317 | 0.57538 | BBB+ |
| NPRL2318 | 0.89896 | BBB+ |
| NPRL2319 | 0.88895 | BBB+ |
| NPRL2320 | 0.89904 | BBB+ |
| NPRL2321 | 0.99607 | BBB+ |
| NPRL2322 | 0.22863 | BBB- |
| NPRL2323 | 0.44589 | BBB- |

|          |         |      |
|----------|---------|------|
| NPRL2324 | 0.94355 | BBB+ |
| NPRL2325 | 0.95951 | BBB+ |
| NPRL2326 | 0.90836 | BBB+ |
| NPRL2327 | 0.95714 | BBB+ |
| NPRL2328 | 0.87270 | BBB+ |
| NPRL2329 | 0.60938 | BBB+ |
| NPRL2330 | 0.00010 | BBB- |
| NPRL2331 | 0.11483 | BBB- |
| NPRL2332 | 0.99301 | BBB+ |
| NPRL2333 | 0.02605 | BBB- |
| NPRL2334 | 0.94592 | BBB+ |
| NPRL2335 | 0.00065 | BBB- |
| NPRL2336 | 0.04001 | BBB- |
| NPRL2337 | 0.01272 | BBB- |
| NPRL2338 | 0.03013 | BBB- |
| NPRL2339 | 0.20190 | BBB- |
| NPRL2340 | 0.00787 | BBB- |
| NPRL2341 | 0.00337 | BBB- |
| NPRL2343 | 0.27231 | BBB- |
| NPRL2347 | 0.83033 | BBB+ |
| NPRL2348 | 0.00265 | BBB- |
| NPRL2349 | 0.02799 | BBB- |
| NPRL2350 | 0.00039 | BBB- |
| NPRL2352 | 0.03613 | BBB- |
| NPRL2354 | 0.05638 | BBB- |
| NPRL2355 | 0.95565 | BBB+ |
| NPRL2356 | 0.00065 | BBB- |
| NPRL2357 | 0.00039 | BBB- |
| NPRL2358 | 0.00363 | BBB- |
| NPRL2359 | 0.00001 | BBB- |
| NPRL2360 | 0.00001 | BBB- |
| NPRL2361 | 0.00006 | BBB- |
| NPRL2362 | 0.00793 | BBB- |
| NPRL2363 | 0.39932 | BBB- |
| NPRL2364 | 0.81847 | BBB+ |
| NPRL2365 | 0.00102 | BBB- |
| NPRL2366 | 0.02694 | BBB- |
| NPRL2367 | 0.00172 | BBB- |
| NPRL2368 | 0.00179 | BBB- |
| NPRL2369 | 0.97103 | BBB+ |
| NPRL2370 | 0.01202 | BBB- |
| NPRL2371 | 0.00500 | BBB- |
| NPRL2372 | 0.00100 | BBB- |
| NPRL2373 | 0.70292 | BBB+ |
| NPRL2374 | 0.01585 | BBB- |
| NPRL2375 | 0.00014 | BBB- |
| NPRL2376 | 0.43400 | BBB- |
| NPRL2377 | 0.00320 | BBB- |
| NPRL2378 | 0.54317 | BBB+ |
| NPRL2379 | 0.00086 | BBB- |
| NPRL2380 | 0.00130 | BBB- |
| NPRL2381 | 0.00003 | BBB- |
| NPRL2382 | 0.06771 | BBB- |
| NPRL2383 | 0.00358 | BBB- |
| NPRL2384 | 0.00399 | BBB- |
| NPRL2385 | 0.17978 | BBB- |
| NPRL2386 | 0.00252 | BBB- |

|          |         |      |
|----------|---------|------|
| NPRL2387 | 0.25580 | BBB- |
| NPRL2388 | 0.11882 | BBB- |
| NPRL2389 | 0.00137 | BBB- |
| NPRL2390 | 0.31251 | BBB- |
| NPRL2391 | 0.00320 | BBB- |
| NPRL2392 | 0.00529 | BBB- |
| NPRL2393 | 0.01348 | BBB- |
| NPRL2395 | 0.99552 | BBB+ |
| NPRL2397 | 0.13469 | BBB- |
| NPRL2398 | 0.98170 | BBB+ |
| NPRL2399 | 0.33598 | BBB- |
| NPRL2400 | 0.13148 | BBB- |
| NPRL2401 | 0.83169 | BBB+ |
| NPRL2402 | 0.00835 | BBB- |
| NPRL2403 | 0.12489 | BBB- |
| NPRL2404 | 0.05011 | BBB- |
| NPRL2405 | 0.04204 | BBB- |
| NPRL2406 | 0.19472 | BBB- |
| NPRL2407 | 0.01016 | BBB- |
| NPRL2408 | 0.02860 | BBB- |
| NPRL2409 | 0.02987 | BBB- |
| NPRL2410 | 0.00022 | BBB- |
| NPRL2411 | 0.90228 | BBB+ |
| NPRL2414 | 0.10666 | BBB- |
| NPRL2415 | 0.12366 | BBB- |
| NPRL2416 | 0.32668 | BBB- |
| NPRL2417 | 0.03305 | BBB- |
| NPRL2418 | 0.42457 | BBB- |
| NPRL2419 | 0.88024 | BBB+ |
| NPRL2420 | 0.98481 | BBB+ |
| NPRL2421 | 0.07356 | BBB- |
| NPRL2422 | 0.26924 | BBB- |
| NPRL2423 | 0.00029 | BBB- |
| NPRL2424 | 0.00024 | BBB- |
| NPRL2425 | 0.41829 | BBB- |
| NPRL2426 | 0.02818 | BBB- |
| NPRL2427 | 0.00016 | BBB- |
| NPRL2428 | 0.00173 | BBB- |
| NPRL2429 | 0.60574 | BBB+ |
| NPRL2430 | 0.32238 | BBB- |
| NPRL2431 | 0.02693 | BBB- |
| NPRL2432 | 0.78949 | BBB+ |
| NPRL2434 | 0.01269 | BBB- |
| NPRL2435 | 0.00873 | BBB- |
| NPRL2436 | 0.01488 | BBB- |
| NPRL2437 | 0.00350 | BBB- |
| NPRL2438 | 0.01261 | BBB- |
| NPRL2439 | 0.33324 | BBB- |
| NPRL2440 | 0.95456 | BBB+ |
| NPRL2441 | 0.06818 | BBB- |
| NPRL2442 | 0.84324 | BBB+ |
| NPRL2443 | 0.10252 | BBB- |
| NPRL2444 | 0.15677 | BBB- |
| NPRL2445 | 0.69494 | BBB+ |
| NPRL2446 | 0.70905 | BBB+ |
| NPRL2447 | 0.93395 | BBB+ |
| NPRL2448 | 0.03824 | BBB- |

|          |         |      |
|----------|---------|------|
| NPRL2449 | 0.18111 | BBB- |
| NPRL2450 | 0.01187 | BBB- |
| NPRL2452 | 0.99209 | BBB+ |
| NPRL2453 | 0.03513 | BBB- |
| NPRL2455 | 0.99918 | BBB+ |
| NPRL2456 | 0.00005 | BBB- |
| NPRL2457 | 0.01491 | BBB- |
| NPRL2458 | 0.00005 | BBB- |
| NPRL2460 | 0.00022 | BBB- |
| NPRL2461 | 0.00746 | BBB- |
| NPRL2462 | 0.01441 | BBB- |
| NPRL2463 | 0.00048 | BBB- |
| NPRL2464 | 0.00117 | BBB- |
| NPRL2465 | 0.23413 | BBB- |
| NPRL2466 | 0.43249 | BBB- |
| NPRL2467 | 0.00043 | BBB- |
| NPRL2468 | 0.56933 | BBB+ |
| NPRL2469 | 0.07522 | BBB- |
| NPRL2470 | 0.01406 | BBB- |
| NPRL2471 | 0.29817 | BBB- |
| NPRL2472 | 0.56786 | BBB+ |
| NPRL2473 | 0.89217 | BBB+ |
| NPRL2474 | 0.03672 | BBB- |
| NPRL2475 | 0.29217 | BBB- |
| NPRL2476 | 0.86188 | BBB+ |
| NPRL2477 | 0.63973 | BBB+ |
| NPRL2478 | 0.21780 | BBB- |
| NPRL2479 | 0.08047 | BBB- |
| NPRL2480 | 0.14911 | BBB- |
| NPRL2481 | 0.96624 | BBB+ |
| NPRL2482 | 0.96510 | BBB+ |
| NPRL2484 | 0.00113 | BBB- |
| NPRL2485 | 0.00109 | BBB- |
| NPRL2486 | 0.00054 | BBB- |
| NPRL2487 | 0.00041 | BBB- |
| NPRL2488 | 0.00819 | BBB- |
| NPRL2489 | 0.00083 | BBB- |
| NPRL2490 | 0.02549 | BBB- |
| NPRL2491 | 0.00086 | BBB- |
| NPRL2492 | 0.00123 | BBB- |
| NPRL2493 | 0.04157 | BBB- |
| NPRL2494 | 0.00321 | BBB- |
| NPRL2495 | 0.02873 | BBB- |
| NPRL2496 | 0.92358 | BBB+ |
| NPRL2497 | 0.15457 | BBB- |
| NPRL2498 | 0.96933 | BBB+ |
| NPRL2499 | 0.02493 | BBB- |
| NPRL2500 | 0.12380 | BBB- |
| NPRL2501 | 0.16594 | BBB- |
| NPRL2502 | 0.02076 | BBB- |
| NPRL2503 | 0.10995 | BBB- |
| NPRL2504 | 0.14469 | BBB- |
| NPRL2505 | 0.01263 | BBB- |
| NPRL2506 | 0.04153 | BBB- |
| NPRL2507 | 0.18388 | BBB- |
| NPRL2508 | 0.00600 | BBB- |
| NPRL2509 | 0.13092 | BBB- |

|          |         |      |
|----------|---------|------|
| NPRL2510 | 0.11084 | BBB- |
| NPRL2511 | 0.06315 | BBB- |
| NPRL2512 | 0.36628 | BBB- |
| NPRL2513 | 0.02213 | BBB- |
| NPRL2514 | 0.02050 | BBB- |
| NPRL2515 | 0.08319 | BBB- |
| NPRL2516 | 0.15908 | BBB- |
| NPRL2517 | 0.63880 | BBB+ |
| NPRL2518 | 0.11780 | BBB- |
| NPRL2519 | 0.02286 | BBB- |
| NPRL2520 | 0.40902 | BBB- |
| NPRL2521 | 0.16543 | BBB- |
| NPRL2522 | 0.86130 | BBB+ |
| NPRL2523 | 0.99139 | BBB+ |
| NPRL2524 | 0.06060 | BBB- |
| NPRL2525 | 0.16368 | BBB- |
| NPRL2526 | 0.23010 | BBB- |
| NPRL2527 | 0.17381 | BBB- |
| NPRL2528 | 0.15219 | BBB- |
| NPRL2529 | 0.39580 | BBB- |
| NPRL2530 | 0.15028 | BBB- |
| NPRL2531 | 0.18975 | BBB- |
| NPRL2532 | 0.16807 | BBB- |
| NPRL2533 | 0.28271 | BBB- |
| NPRL2534 | 0.58114 | BBB+ |
| NPRL2535 | 0.37358 | BBB- |
| NPRL2536 | 0.18235 | BBB- |
| NPRL2537 | 0.07567 | BBB- |
| NPRL2538 | 0.06092 | BBB- |
| NPRL2539 | 0.03806 | BBB- |
| NPRL2540 | 0.12081 | BBB- |
| NPRL2541 | 0.27710 | BBB- |
| NPRL2542 | 0.64052 | BBB+ |
| NPRL2543 | 0.97546 | BBB+ |
| NPRL2544 | 0.00345 | BBB- |
| NPRL2545 | 0.77549 | BBB+ |
| NPRL2546 | 0.46089 | BBB- |
| NPRL2547 | 0.74692 | BBB+ |
| NPRL2548 | 0.23006 | BBB- |
| NPRL2549 | 0.74753 | BBB+ |
| NPRL2550 | 0.96218 | BBB+ |
| NPRL2551 | 0.00143 | BBB- |
| NPRL2552 | 0.01135 | BBB- |
| NPRL2554 | 0.00040 | BBB- |
| NPRL2555 | 0.00148 | BBB- |
| NPRL2556 | 0.15859 | BBB- |
| NPRL2557 | 0.00113 | BBB- |
| NPRL2558 | 0.00142 | BBB- |
| NPRL2559 | 0.00072 | BBB- |
| NPRL2561 | 0.08978 | BBB- |
| NPRL2562 | 0.12991 | BBB- |
| NPRL2564 | 0.01123 | BBB- |
| NPRL2565 | 0.03786 | BBB- |
| NPRL2566 | 0.42349 | BBB- |
| NPRL2567 | 0.44715 | BBB- |
| NPRL2569 | 0.74676 | BBB+ |
| NPRL2570 | 0.64353 | BBB+ |

|          |         |      |
|----------|---------|------|
| NPRL2571 | 0.00674 | BBB- |
| NPRL2573 | 0.00220 | BBB- |
| NPRL2574 | 0.00062 | BBB- |
| NPRL2575 | 0.00086 | BBB- |
| NPRL2576 | 0.00001 | BBB- |
| NPRL2577 | 0.00012 | BBB- |
| NPRL2578 | 0.00038 | BBB- |
| NPRL2579 | 0.00089 | BBB- |
| NPRL2580 | 0.00030 | BBB- |
| NPRL2581 | 0.00032 | BBB- |
| NPRL2582 | 0.09810 | BBB- |
| NPRL2583 | 0.99805 | BBB+ |
| NPRL2584 | 0.00375 | BBB- |
| NPRL2585 | 0.06489 | BBB- |
| NPRL2586 | 0.99592 | BBB+ |
| NPRL2587 | 0.99970 | BBB+ |
| NPRL2588 | 0.90804 | BBB+ |
| NPRL2589 | 0.66248 | BBB+ |
| NPRL2591 | 0.98332 | BBB+ |
| NPRL2592 | 0.97840 | BBB+ |
| NPRL2593 | 0.99827 | BBB+ |
| NPRL2594 | 0.99962 | BBB+ |
| NPRL2595 | 0.99929 | BBB+ |
| NPRL2596 | 0.34941 | BBB- |
| NPRL2597 | 0.87280 | BBB+ |
| NPRL2598 | 0.00530 | BBB- |
| NPRL2599 | 0.00239 | BBB- |
| NPRL2600 | 0.00489 | BBB- |
| NPRL2603 | 0.08425 | BBB- |
| NPRL2604 | 0.00492 | BBB- |
| NPRL2605 | 0.00811 | BBB- |
| NPRL2606 | 0.01697 | BBB- |
| NPRL2607 | 0.02158 | BBB- |
| NPRL2608 | 0.05549 | BBB- |
| NPRL2609 | 0.37086 | BBB- |
| NPRL2610 | 0.07454 | BBB- |
| NPRL2611 | 0.90196 | BBB+ |
| NPRL2612 | 0.87037 | BBB+ |
| NPRL2613 | 0.46328 | BBB- |
| NPRL2614 | 0.96204 | BBB+ |
| NPRL2615 | 0.91297 | BBB+ |
| NPRL2616 | 0.89468 | BBB+ |
| NPRL2617 | 0.88556 | BBB+ |
| NPRL2618 | 0.94992 | BBB+ |
| NPRL2619 | 0.72888 | BBB+ |
| NPRL2620 | 0.96951 | BBB+ |
| NPRL2621 | 0.99320 | BBB+ |
| NPRL2622 | 0.07340 | BBB- |
| NPRL2623 | 0.83259 | BBB+ |
| NPRL2624 | 0.90910 | BBB+ |
| NPRL2625 | 0.00092 | BBB- |
| NPRL2626 | 0.01923 | BBB- |
| NPRL2627 | 0.02144 | BBB- |
| NPRL2628 | 0.00042 | BBB- |
| NPRL2629 | 0.00833 | BBB- |
| NPRL2630 | 0.00114 | BBB- |
| NPRL2631 | 0.00005 | BBB- |



|          |         |      |
|----------|---------|------|
| NPRL2632 | 0.01932 | BBB- |
| NPRL2633 | 0.26034 | BBB- |
| NPRL2634 | 0.87516 | BBB+ |
| NPRL2635 | 0.00287 | BBB- |
| NPRL2636 | 0.36212 | BBB- |
| NPRL2637 | 0.00971 | BBB- |
| NPRL2639 | 0.00094 | BBB- |
| NPRL2640 | 0.03864 | BBB- |
| NPRL2641 | 0.01142 | BBB- |
| NPRL2642 | 0.08979 | BBB- |
| NPRL2643 | 0.41584 | BBB- |
| NPRL2644 | 0.00706 | BBB- |
| NPRL2645 | 0.00070 | BBB- |
| NPRL2646 | 0.00001 | BBB- |
| NPRL2647 | 0.00030 | BBB- |
| NPRL2648 | 0.77414 | BBB+ |
| NPRL2649 | 0.61354 | BBB+ |
| NPRL2650 | 0.00038 | BBB- |
| NPRL2651 | 0.45628 | BBB- |
| NPRL2652 | 0.02038 | BBB- |
| NPRL2653 | 0.01289 | BBB- |
| NPRL2654 | 0.04989 | BBB- |
| NPRL2655 | 0.00210 | BBB- |
| NPRL2657 | 0.00021 | BBB- |
| NPRL2658 | 0.00210 | BBB- |
| NPRL2659 | 0.00090 | BBB- |
| NPRL2660 | 0.00129 | BBB- |
| NPRL2661 | 0.00139 | BBB- |
| NPRL2662 | 0.03404 | BBB- |
| NPRL2663 | 0.85319 | BBB+ |
| NPRL2664 | 0.16101 | BBB- |
| NPRL2665 | 0.68100 | BBB+ |
| NPRL2666 | 0.88585 | BBB+ |
| NPRL2667 | 0.24067 | BBB- |
| NPRL2668 | 0.04668 | BBB- |
| NPRL2669 | 0.01289 | BBB- |
| NPRL2670 | 0.85799 | BBB+ |
| NPRL2671 | 0.69996 | BBB+ |
| NPRL2672 | 0.81549 | BBB+ |
| NPRL2673 | 0.94905 | BBB+ |
| NPRL2674 | 0.90583 | BBB+ |
| NPRL2675 | 0.86248 | BBB+ |
| NPRL2676 | 0.95193 | BBB+ |
| NPRL2677 | 0.04433 | BBB- |
| NPRL2678 | 0.53503 | BBB+ |
| NPRL2679 | 0.17774 | BBB- |
| NPRL2680 | 0.17782 | BBB- |
| NPRL2681 | 0.25376 | BBB- |
| NPRL2682 | 0.08501 | BBB- |
| NPRL2683 | 0.24116 | BBB- |
| NPRL2684 | 0.06740 | BBB- |
| NPRL2685 | 0.02954 | BBB- |
| NPRL2686 | 0.02669 | BBB- |
| NPRL2687 | 0.02470 | BBB- |
| NPRL2688 | 0.18248 | BBB- |
| NPRL2689 | 0.01601 | BBB- |
| NPRL2690 | 0.07813 | BBB- |

|                 |         |      |
|-----------------|---------|------|
| NPRL2691        | 0.50935 | BBB+ |
| NPRL2692        | 0.16228 | BBB- |
| NPRL2693        | 0.11512 | BBB- |
| NPRL2694        | 0.24188 | BBB- |
| NPRL2695        | 0.18867 | BBB- |
| NPRL2696        | 0.11088 | BBB- |
| NPRL2697        | 0.08862 | BBB- |
| NPRL2698        | 0.03480 | BBB- |
| NPRL2699        | 0.13047 | BBB- |
| NPRL26A27:I2738 | 0.06112 | BBB- |
| NPRL2700        | 0.19968 | BBB- |
| NPRL2701        | 0.19268 | BBB- |
| NPRL2702        | 0.01264 | BBB- |
| NPRL2703        | 0.02517 | BBB- |
| NPRL2704        | 0.02054 | BBB- |
| NPRL2705        | 0.05824 | BBB- |
| NPRL2706        | 0.09957 | BBB- |
| NPRL2707        | 0.50461 | BBB+ |
| NPRL2708        | 0.02662 | BBB- |
| NPRL2709        | 0.72529 | BBB+ |
| NPRL2710        | 0.81979 | BBB+ |
| NPRL2711        | 0.01864 | BBB- |
| NPRL2712        | 0.18917 | BBB- |
| NPRL2713        | 0.06475 | BBB- |
| NPRL2714        | 0.03655 | BBB- |
| NPRL2715        | 0.52180 | BBB+ |
| NPRL2716        | 0.13035 | BBB- |
| NPRL2717        | 0.36832 | BBB- |
| NPRL2718        | 0.04645 | BBB- |
| NPRL2719        | 0.20525 | BBB- |
| NPRL2720        | 0.70135 | BBB+ |
| NPRL2721        | 0.74829 | BBB+ |
| NPRL2722        | 0.02170 | BBB- |
| NPRL2723        | 0.05846 | BBB- |
| NPRL2724        | 0.01151 | BBB- |
| NPRL2725        | 0.65361 | BBB+ |
| NPRL2726        | 0.00950 | BBB- |
| NPRL2728        | 0.05398 | BBB- |
| NPRL2729        | 0.94238 | BBB+ |
| NPRL2730        | 0.02425 | BBB- |
| NPRL2731        | 0.00444 | BBB- |
| NPRL2732        | 0.00931 | BBB- |
| NPRL2733        | 0.00684 | BBB- |
| NPRL2734        | 0.02090 | BBB- |
| NPRL2735        | 0.00185 | BBB- |
| NPRL2736        | 0.00691 | BBB- |
| NPRL2737        | 0.03334 | BBB- |
| NPRL2738        | 0.00576 | BBB- |
| NPRL2739        | 0.04423 | BBB- |
| NPRL2740        | 0.10622 | BBB- |
| NPRL2741        | 0.00986 | BBB- |
| NPRL2742        | 0.11033 | BBB- |
| NPRL2743        | 0.54836 | BBB+ |
| NPRL2745        | 0.00717 | BBB- |
| NPRL2746        | 0.01275 | BBB- |
| NPRL2747        | 0.05049 | BBB- |
| NPRL2748        | 0.90855 | BBB+ |

|          |         |      |
|----------|---------|------|
| NPRL2749 | 0.88108 | BBB+ |
| NPRL2750 | 0.90900 | BBB+ |
| NPRL2751 | 0.00012 | BBB- |
| NPRL2752 | 0.00022 | BBB- |
| NPRL2753 | 0.03941 | BBB- |
| NPRL2754 | 0.00160 | BBB- |
| NPRL2755 | 0.41176 | BBB- |
| NPRL2756 | 0.05217 | BBB- |
| NPRL2757 | 0.00162 | BBB- |
| NPRL2758 | 0.00369 | BBB- |
| NPRL2759 | 0.01072 | BBB- |
| NPRL2760 | 0.06272 | BBB- |
| NPRL2761 | 0.00251 | BBB- |
| NPRL2762 | 0.01498 | BBB- |
| NPRL2763 | 0.00164 | BBB- |
| NPRL2764 | 0.13764 | BBB- |
| NPRL2765 | 0.19303 | BBB- |
| NPRL2766 | 0.30047 | BBB- |
| NPRL2767 | 0.00030 | BBB- |
| NPRL2768 | 0.01599 | BBB- |
| NPRL2769 | 0.00257 | BBB- |
| NPRL2770 | 0.81563 | BBB+ |
| NPRL2771 | 0.02433 | BBB- |
| NPRL2772 | 0.21214 | BBB- |
| NPRL2773 | 0.00234 | BBB- |
| NPRL2774 | 0.02288 | BBB- |
| NPRL2775 | 0.29449 | BBB- |
| NPRL2776 | 0.02709 | BBB- |
| NPRL2777 | 0.00397 | BBB- |
| NPRL2778 | 0.00812 | BBB- |
| NPRL2779 | 0.01154 | BBB- |
| NPRL2780 | 0.01146 | BBB- |
| NPRL2782 | 0.85005 | BBB+ |
| NPRL2783 | 0.99470 | BBB+ |
| NPRL2784 | 0.98564 | BBB+ |
| NPRL2785 | 0.63798 | BBB+ |
| NPRL2786 | 0.99372 | BBB+ |
| NPRL2787 | 0.94531 | BBB+ |
| NPRL2788 | 0.78138 | BBB+ |
| NPRL2789 | 0.94676 | BBB+ |
| NPRL2790 | 0.93347 | BBB+ |
| NPRL2791 | 0.99907 | BBB+ |
| NPRL2792 | 0.83091 | BBB+ |
| NPRL2793 | 0.60076 | BBB+ |
| NPRL2794 | 0.63557 | BBB+ |
| NPRL2795 | 0.99950 | BBB+ |
| NPRL2796 | 0.97534 | BBB+ |
| NPRL2797 | 0.99717 | BBB+ |
| NPRL2798 | 0.59669 | BBB+ |
| NPRL2799 | 0.00460 | BBB- |
| NPRL2800 | 0.04859 | BBB- |
| NPRL2801 | 0.42769 | BBB- |
| NPRL2802 | 0.52020 | BBB+ |
| NPRL2803 | 0.78277 | BBB+ |
| NPRL2804 | 0.33847 | BBB- |
| NPRL2805 | 0.08994 | BBB- |
| NPRL2806 | 0.99069 | BBB+ |

|          |         |      |
|----------|---------|------|
| NPRL2807 | 0.99377 | BBB+ |
| NPRL2808 | 0.97984 | BBB+ |
| NPRL2809 | 0.99825 | BBB+ |
| NPRL2810 | 0.03517 | BBB- |
| NPRL2811 | 0.01720 | BBB- |
| NPRL2813 | 0.81081 | BBB+ |
| NPRL2814 | 0.93396 | BBB+ |
| NPRL2815 | 0.88660 | BBB+ |
| NPRL2816 | 0.05765 | BBB- |
| NPRL2817 | 0.37824 | BBB- |
| NPRL2818 | 0.04129 | BBB- |
| NPRL2819 | 0.62634 | BBB+ |
| NPRL2820 | 0.22829 | BBB- |
| NPRL2821 | 0.53565 | BBB+ |
| NPRL2822 | 0.05069 | BBB- |
| NPRL2823 | 0.29266 | BBB- |
| NPRL2824 | 0.03312 | BBB- |
| NPRL2825 | 0.05011 | BBB- |
| NPRL2826 | 0.02839 | BBB- |
| NPRL2827 | 0.46882 | BBB- |
| NPRL2828 | 0.15369 | BBB- |
| NPRL2829 | 0.40275 | BBB- |
| NPRL2830 | 0.34543 | BBB- |
| NPRL2831 | 0.70453 | BBB+ |
| NPRL2832 | 0.91813 | BBB+ |
| NPRL2833 | 0.00010 | BBB- |
| NPRL2834 | 0.00005 | BBB- |
| NPRL2835 | 0.00171 | BBB- |
| NPRL2836 | 0.00038 | BBB- |
| NPRL2837 | 0.00008 | BBB- |
| NPRL2838 | 0.00005 | BBB- |
| NPRL2839 | 0.00100 | BBB- |
| NPRL2840 | 0.00012 | BBB- |
| NPRL2841 | 0.00010 | BBB- |
| NPRL2842 | 0.00012 | BBB- |
| NPRL2843 | 0.00006 | BBB- |
| NPRL2844 | 0.00004 | BBB- |
| NPRL2845 | 0.00056 | BBB- |
| NPRL2846 | 0.00001 | BBB- |
| NPRL2847 | 0.00065 | BBB- |
| NPRL2848 | 0.00032 | BBB- |
| NPRL2849 | 0.00015 | BBB- |
| NPRL2850 | 0.00100 | BBB- |
| NPRL2851 | 0.00036 | BBB- |
| NPRL2852 | 0.00039 | BBB- |
| NPRL2853 | 0.06721 | BBB- |
| NPRL2854 | 0.02185 | BBB- |
| NPRL2856 | 0.35304 | BBB- |
| NPRL2858 | 0.18685 | BBB- |
| NPRL2859 | 0.42514 | BBB- |
| NPRL2860 | 0.00020 | BBB- |
| NPRL2861 | 0.00345 | BBB- |
| NPRL2862 | 0.23980 | BBB- |
| NPRL2863 | 0.98600 | BBB+ |
| NPRL2864 | 0.33083 | BBB- |
| NPRL2865 | 0.00027 | BBB- |
| NPRL2866 | 0.95544 | BBB+ |

|          |         |      |
|----------|---------|------|
| NPRL2867 | 0.01267 | BBB- |
| NPRL2868 | 0.00094 | BBB- |
| NPRL2869 | 0.00031 | BBB- |
| NPRL2870 | 0.00056 | BBB- |
| NPRL2871 | 0.00096 | BBB- |
| NPRL2872 | 0.66005 | BBB+ |
| NPRL2873 | 0.00055 | BBB- |
| NPRL2875 | 0.00477 | BBB- |
| NPRL2877 | 0.00146 | BBB- |
| NPRL2878 | 0.00007 | BBB- |
| NPRL2879 | 0.00008 | BBB- |
| NPRL2880 | 0.00019 | BBB- |
| NPRL2881 | 0.00391 | BBB- |
| NPRL2882 | 0.00056 | BBB- |
| NPRL2883 | 0.00049 | BBB- |
| NPRL2884 | 0.00063 | BBB- |
| NPRL2885 | 0.00016 | BBB- |
| NPRL2886 | 0.00016 | BBB- |
| NPRL2887 | 0.00149 | BBB- |
| NPRL2888 | 0.00126 | BBB- |
| NPRL2889 | 0.00024 | BBB- |
| NPRL2890 | 0.00047 | BBB- |
| NPRL2891 | 0.00087 | BBB- |
| NPRL2892 | 0.00215 | BBB- |
| NPRL2893 | 0.00199 | BBB- |
| NPRL2894 | 0.00006 | BBB- |
| NPRL2895 | 0.00044 | BBB- |
| NPRL2896 | 0.00065 | BBB- |
| NPRL2897 | 0.00007 | BBB- |
| NPRL2898 | 0.00012 | BBB- |
| NPRL2899 | 0.00025 | BBB- |
| NPRL2900 | 0.00046 | BBB- |
| NPRL2901 | 0.00007 | BBB- |
| NPRL2902 | 0.00038 | BBB- |
| NPRL2904 | 0.02345 | BBB- |
| NPRL2905 | 0.00036 | BBB- |
| NPRL2906 | 0.01004 | BBB- |
| NPRL2907 | 0.86119 | BBB+ |
| NPRL2908 | 0.00007 | BBB- |
| NPRL2909 | 0.00008 | BBB- |
| NPRL2910 | 0.00025 | BBB- |
| NPRL2911 | 0.00003 | BBB- |
| NPRL2912 | 0.01179 | BBB- |
| NPRL2913 | 0.00122 | BBB- |
| NPRL2914 | 0.77954 | BBB+ |
| NPRL2915 | 0.40954 | BBB- |
| NPRL2916 | 0.52291 | BBB+ |
| NPRL2917 | 0.10272 | BBB- |
| NPRL2918 | 0.39268 | BBB- |
| NPRL2919 | 0.84858 | BBB+ |
| NPRL2920 | 0.62934 | BBB+ |
| NPRL2921 | 0.53025 | BBB+ |
| NPRL2922 | 0.75411 | BBB+ |
| NPRL2923 | 0.36593 | BBB- |
| NPRL2924 | 0.04048 | BBB- |
| NPRL2925 | 0.00839 | BBB- |
| NPRL2926 | 0.00887 | BBB- |

|          |         |      |
|----------|---------|------|
| NPRL2928 | 0.01122 | BBB- |
| NPRL2929 | 0.02236 | BBB- |
| NPRL2930 | 0.00300 | BBB- |
| NPRL2933 | 0.13581 | BBB- |
| NPRL2937 | 0.00005 | BBB- |
| NPRL2938 | 0.99209 | BBB+ |
| NPRL2939 | 0.88477 | BBB+ |
| NPRL2940 | 0.10341 | BBB- |
| NPRL2943 | 0.72700 | BBB+ |
| NPRL2944 | 0.88284 | BBB+ |
| NPRL2945 | 0.91057 | BBB+ |
| NPRL2946 | 0.00318 | BBB- |
| NPRL2947 | 0.61606 | BBB+ |
| NPRL2948 | 0.98377 | BBB+ |
| NPRL2949 | 0.16351 | BBB- |
| NPRL2950 | 0.57907 | BBB+ |
| NPRL2951 | 0.02513 | BBB- |
| NPRL2952 | 0.00197 | BBB- |
| NPRL2953 | 0.51883 | BBB+ |
| NPRL2954 | 0.00218 | BBB- |
| NPRL2955 | 0.00105 | BBB- |
| NPRL2956 | 0.25802 | BBB- |
| NPRL2957 | 0.26997 | BBB- |
| NPRL2958 | 0.07546 | BBB- |
| NPRL2959 | 0.00011 | BBB- |
| NPRL2961 | 0.99923 | BBB+ |
| NPRL2962 | 0.00511 | BBB- |
| NPRL2963 | 0.87534 | BBB+ |
| NPRL2964 | 0.90347 | BBB+ |
| NPRL2965 | 0.13448 | BBB- |
| NPRL2966 | 0.00810 | BBB- |
| NPRL2968 | 0.99689 | BBB+ |
| NPRL2969 | 0.00110 | BBB- |
| NPRL2970 | 0.85345 | BBB+ |
| NPRL2971 | 0.01158 | BBB- |
| NPRL2972 | 0.93990 | BBB+ |
| NPRL2973 | 0.95159 | BBB+ |
| NPRL2974 | 0.00437 | BBB- |
| NPRL2975 | 0.00173 | BBB- |
| NPRL2976 | 0.00124 | BBB- |
| NPRL2977 | 0.02453 | BBB- |
| NPRL2978 | 0.03556 | BBB- |
| NPRL2979 | 0.65916 | BBB+ |
| NPRL2980 | 0.96031 | BBB+ |
| NPRL2981 | 0.10146 | BBB- |
| NPRL2983 | 0.09054 | BBB- |
| NPRL2984 | 0.36139 | BBB- |
| NPRL2985 | 0.82863 | BBB+ |
| NPRL2988 | 0.29619 | BBB- |
| NPRL2990 | 0.03286 | BBB- |
| NPRL2992 | 0.88668 | BBB+ |
| NPRL2993 | 0.63475 | BBB+ |
| NPRL2994 | 0.95261 | BBB+ |
| NPRL2995 | 0.94475 | BBB+ |
| NPRL2996 | 0.69398 | BBB+ |
| NPRL2997 | 0.99956 | BBB+ |
| NPRL2998 | 0.61171 | BBB+ |

|          |         |      |
|----------|---------|------|
| NPRL2999 | 0.80347 | BBB+ |
| NPRL3000 | 0.30119 | BBB- |
| NPRL3001 | 0.71679 | BBB+ |
| NPRL3002 | 0.01996 | BBB- |
| NPRL3003 | 0.29755 | BBB- |
| NPRL3004 | 0.43857 | BBB- |
| NPRL3005 | 0.00210 | BBB- |
| NPRL3006 | 0.00147 | BBB- |
| NPRL3007 | 0.04806 | BBB- |
| NPRL3009 | 0.98004 | BBB+ |
| NPRL3010 | 0.01382 | BBB- |
| NPRL3011 | 0.83180 | BBB+ |
| NPRL3012 | 0.98634 | BBB+ |
| NPRL3013 | 0.66725 | BBB+ |
| NPRL3014 | 0.00799 | BBB- |
| NPRL3015 | 0.81909 | BBB+ |
| NPRL3016 | 0.00100 | BBB- |
| NPRL3017 | 0.02041 | BBB- |
| NPRL3018 | 0.01241 | BBB- |
| NPRL3019 | 0.02225 | BBB- |
| NPRL3020 | 0.82088 | BBB+ |
| NPRL3021 | 0.02304 | BBB- |
| NPRL3022 | 0.00552 | BBB- |
| NPRL3023 | 0.00460 | BBB- |
| NPRL3024 | 0.05233 | BBB- |
| NPRL3025 | 0.59787 | BBB+ |
| NPRL3026 | 0.00175 | BBB- |
| NPRL3027 | 0.23639 | BBB- |
| NPRL3029 | 0.00007 | BBB- |
| NPRL3030 | 0.13679 | BBB- |
| NPRL3031 | 0.00010 | BBB- |
| NPRL3033 | 0.45444 | BBB- |
| NPRL3034 | 0.92500 | BBB+ |
| NPRL3035 | 0.81701 | BBB+ |
| NPRL3036 | 0.02185 | BBB- |
| NPRL3037 | 0.11230 | BBB- |
| NPRL3038 | 0.00044 | BBB- |
| NPRL3039 | 0.29345 | BBB- |
| NPRL3040 | 0.79988 | BBB+ |
| NPRL3041 | 0.28772 | BBB- |
| NPRL3043 | 0.35935 | BBB- |
| NPRL3045 | 0.20072 | BBB- |
| NPRL3046 | 0.52099 | BBB+ |
| NPRL3047 | 0.64034 | BBB+ |
| NPRL3048 | 0.24967 | BBB- |
| NPRL3049 | 0.73382 | BBB+ |
| NPRL3050 | 0.00016 | BBB- |
| NPRL3051 | 0.00015 | BBB- |
| NPRL3052 | 0.00041 | BBB- |
| NPRL3053 | 0.00018 | BBB- |
| NPRL3054 | 0.93082 | BBB+ |
| NPRL3055 | 0.47075 | BBB- |
| NPRL3056 | 0.62857 | BBB+ |
| NPRL3057 | 0.00263 | BBB- |
| NPRL3058 | 0.00002 | BBB- |
| NPRL3061 | 0.00003 | BBB- |
| NPRL3062 | 0.01286 | BBB- |

|          |         |      |
|----------|---------|------|
| NPRL3063 | 0.00015 | BBB- |
| NPRL3064 | 0.00006 | BBB- |
| NPRL3065 | 0.00033 | BBB- |
| NPRL3066 | 0.05976 | BBB- |
| NPRL3067 | 0.00121 | BBB- |
| NPRL3069 | 0.00048 | BBB- |
| NPRL3070 | 0.00081 | BBB- |
| NPRL3071 | 0.00029 | BBB- |
| NPRL3072 | 0.00157 | BBB- |
| NPRL3073 | 0.46802 | BBB- |
| NPRL3074 | 0.00095 | BBB- |
| NPRL3075 | 0.00068 | BBB- |
| NPRL3076 | 0.00482 | BBB- |
| NPRL3077 | 0.00017 | BBB- |
| NPRL3078 | 0.00732 | BBB- |
| NPRL3079 | 0.00015 | BBB- |
| NPRL3081 | 0.01000 | BBB- |
| NPRL3082 | 0.00010 | BBB- |
| NPRL3083 | 0.00080 | BBB- |
| NPRL3084 | 0.00073 | BBB- |
| NPRL3085 | 0.00060 | BBB- |
| NPRL3086 | 0.00027 | BBB- |
| NPRL3087 | 0.03851 | BBB- |
| NPRL3088 | 0.17021 | BBB- |
| NPRL3089 | 0.00788 | BBB- |
| NPRL3090 | 0.58155 | BBB+ |
| NPRL3092 | 0.60979 | BBB+ |
| NPRL3093 | 0.25123 | BBB- |
| NPRL3094 | 0.10022 | BBB- |
| NPRL3095 | 0.85745 | BBB+ |
| NPRL3096 | 0.62410 | BBB+ |
| NPRL3098 | 0.00001 | BBB- |
| NPRL3099 | 0.00029 | BBB- |
| NPRL3100 | 0.00296 | BBB- |
| NPRL3101 | 0.00432 | BBB- |
| NPRL3102 | 0.62734 | BBB+ |
| NPRL3103 | 0.00181 | BBB- |
| NPRL3104 | 0.00177 | BBB- |
| NPRL3105 | 0.00145 | BBB- |
| NPRL3106 | 0.82252 | BBB+ |
| NPRL3109 | 0.00117 | BBB- |
| NPRL3111 | 0.38994 | BBB- |
| NPRL3112 | 0.00312 | BBB- |
| NPRL3113 | 0.99918 | BBB+ |
| NPRL3114 | 0.00010 | BBB- |
| NPRL3115 | 0.00454 | BBB- |
| NPRL3116 | 0.00160 | BBB- |
| NPRL3117 | 0.00086 | BBB- |
| NPRL3118 | 0.00299 | BBB- |
| NPRL3119 | 0.89921 | BBB+ |
| NPRL3120 | 0.97468 | BBB+ |
| NPRL3121 | 0.92336 | BBB+ |
| NPRL3122 | 0.08567 | BBB- |
| NPRL3123 | 0.50630 | BBB+ |
| NPRL3124 | 0.99554 | BBB+ |
| NPRL3125 | 0.88979 | BBB+ |
| NPRL3126 | 0.20189 | BBB- |



|          |         |      |
|----------|---------|------|
| NPRL3127 | 0.93473 | BBB+ |
| NPRL3128 | 0.98710 | BBB+ |
| NPRL3129 | 0.00261 | BBB- |
| NPRL3130 | 0.00195 | BBB- |
| NPRL3131 | 0.81099 | BBB+ |
| NPRL3132 | 0.72224 | BBB+ |
| NPRL3133 | 0.97363 | BBB+ |
| NPRL3134 | 0.31938 | BBB- |
| NPRL3135 | 0.91365 | BBB+ |
| NPRL3136 | 0.00407 | BBB- |
| NPRL3137 | 0.45043 | BBB- |
| NPRL3138 | 0.01529 | BBB- |
| NPRL3139 | 0.95642 | BBB+ |
| NPRL3140 | 0.57399 | BBB+ |
| NPRL3141 | 0.91468 | BBB+ |
| NPRL3142 | 0.99305 | BBB+ |
| NPRL3143 | 0.19746 | BBB- |
| NPRL3144 | 0.85753 | BBB+ |
| NPRL3145 | 0.81043 | BBB+ |
| NPRL3146 | 0.01722 | BBB- |
| NPRL3147 | 0.00395 | BBB- |
| NPRL3148 | 0.00554 | BBB- |
| NPRL3149 | 0.01538 | BBB- |
| NPRL3150 | 0.07806 | BBB- |
| NPRL3151 | 0.26922 | BBB- |
| NPRL3152 | 0.06688 | BBB- |
| NPRL3153 | 0.05937 | BBB- |
| NPRL3154 | 0.99985 | BBB+ |
| NPRL3155 | 0.99984 | BBB+ |
| NPRL3156 | 0.99986 | BBB+ |
| NPRL3157 | 0.99985 | BBB+ |
| NPRL3158 | 0.94581 | BBB+ |
| NPRL3159 | 0.00293 | BBB- |
| NPRL3160 | 0.98860 | BBB+ |
| NPRL3162 | 0.98432 | BBB+ |
| NPRL3163 | 0.98390 | BBB+ |
| NPRL3164 | 0.96699 | BBB+ |
| NPRL3165 | 0.98942 | BBB+ |
| NPRL3166 | 0.98867 | BBB+ |
| NPRL3169 | 0.41565 | BBB- |
| NPRL3170 | 0.91860 | BBB+ |
| NPRL3171 | 0.99477 | BBB+ |
| NPRL3172 | 0.82048 | BBB+ |
| NPRL3173 | 0.63969 | BBB+ |
| NPRL3174 | 0.09159 | BBB- |
| NPRL3175 | 0.38585 | BBB- |
| NPRL3176 | 0.11241 | BBB- |
| NPRL3177 | 0.96086 | BBB+ |
| NPRL3179 | 0.11473 | BBB- |
| NPRL3181 | 0.89082 | BBB+ |
| NPRL3182 | 0.95034 | BBB+ |
| NPRL3183 | 0.00002 | BBB- |
| NPRL3184 | 0.00457 | BBB- |
| NPRL3185 | 0.01022 | BBB- |
| NPRL3186 | 0.61112 | BBB+ |
| NPRL3187 | 0.99892 | BBB+ |
| NPRL3188 | 0.11173 | BBB- |

|          |         |      |
|----------|---------|------|
| NPRL3189 | 0.82178 | BBB+ |
| NPRL3190 | 0.85877 | BBB+ |
| NPRL3191 | 0.93364 | BBB+ |
| NPRL3192 | 0.94498 | BBB+ |
| NPRL3193 | 0.99366 | BBB+ |
| NPRL3194 | 0.99250 | BBB+ |
| NPRL3195 | 0.88052 | BBB+ |
| NPRL3196 | 0.38682 | BBB- |
| NPRL3197 | 0.00117 | BBB- |
| NPRL3198 | 0.01318 | BBB- |
| NPRL3199 | 0.00271 | BBB- |
| NPRL3200 | 0.08250 | BBB- |
| NPRL3202 | 0.01752 | BBB- |
| NPRL3203 | 0.95929 | BBB+ |
| NPRL3204 | 0.02743 | BBB- |
| NPRL3205 | 0.01826 | BBB- |
| NPRL3206 | 0.64282 | BBB+ |
| NPRL3207 | 0.03533 | BBB- |
| NPRL3208 | 0.13442 | BBB- |
| NPRL3209 | 0.00199 | BBB- |
| NPRL3210 | 0.08672 | BBB- |
| NPRL3211 | 0.23695 | BBB- |
| NPRL3212 | 0.00235 | BBB- |
| NPRL3213 | 0.99960 | BBB+ |
| NPRL3214 | 0.12237 | BBB- |
| NPRL3215 | 0.14140 | BBB- |
| NPRL3217 | 0.83596 | BBB+ |
| NPRL3218 | 0.36242 | BBB- |
| NPRL3220 | 0.01488 | BBB- |
| NPRL3222 | 0.00005 | BBB- |
| NPRL3223 | 0.68403 | BBB+ |
| NPRL3224 | 0.00402 | BBB- |
| NPRL3225 | 0.13852 | BBB- |
| NPRL3226 | 0.16650 | BBB- |
| NPRL3227 | 0.07023 | BBB- |
| NPRL3228 | 0.20660 | BBB- |
| NPRL3229 | 0.29300 | BBB- |
| NPRL3231 | 0.26205 | BBB- |
| NPRL3232 | 0.00121 | BBB- |
| NPRL3233 | 0.03311 | BBB- |
| NPRL3234 | 0.05762 | BBB- |
| NPRL3235 | 0.94592 | BBB+ |
| NPRL3236 | 0.94678 | BBB+ |
| NPRL3237 | 0.45636 | BBB- |
| NPRL3238 | 0.66445 | BBB+ |
| NPRL3241 | 0.12913 | BBB- |
| NPRL3242 | 0.51211 | BBB+ |
| NPRL3245 | 0.04978 | BBB- |
| NPRL3246 | 0.00922 | BBB- |
| NPRL3247 | 0.02943 | BBB- |
| NPRL3251 | 0.12984 | BBB- |
| NPRL3252 | 0.95456 | BBB+ |
| NPRL3253 | 0.19919 | BBB- |
| NPRL3254 | 0.00742 | BBB- |
| NPRL3256 | 0.43552 | BBB- |
| NPRL3258 | 0.00427 | BBB- |
| NPRL3259 | 0.00555 | BBB- |

|          |         |      |
|----------|---------|------|
| NPRL3261 | 0.01086 | BBB- |
| NPRL3262 | 0.67834 | BBB+ |
| NPRL3263 | 0.31866 | BBB- |
| NPRL3264 | 0.33733 | BBB- |
| NPRL3265 | 0.29359 | BBB- |
| NPRL3266 | 0.81532 | BBB+ |
| NPRL3267 | 0.41467 | BBB- |
| NPRL3268 | 0.01151 | BBB- |
| NPRL3269 | 0.02630 | BBB- |
| NPRL3270 | 0.00047 | BBB- |
| NPRL3271 | 0.00058 | BBB- |
| NPRL3272 | 0.00089 | BBB- |
| NPRL3274 | 0.01104 | BBB- |
| NPRL3275 | 0.12092 | BBB- |
| NPRL3276 | 0.00293 | BBB- |
| NPRL3279 | 0.06509 | BBB- |
| NPRL3280 | 0.06125 | BBB- |
| NPRL3283 | 0.37565 | BBB- |
| NPRL3284 | 0.31613 | BBB- |
| NPRL3285 | 0.98664 | BBB+ |
| NPRL3286 | 0.97901 | BBB+ |
| NPRL3288 | 0.00027 | BBB- |
| NPRL3291 | 0.96790 | BBB+ |
| NPRL3292 | 0.80517 | BBB+ |
| NPRL3295 | 0.99330 | BBB+ |
| NPRL3296 | 0.71079 | BBB+ |
| NPRL3297 | 0.21723 | BBB- |
| NPRL3298 | 0.98286 | BBB+ |
| NPRL3299 | 0.48566 | BBB- |
| NPRL3302 | 0.01367 | BBB- |
| NPRL3303 | 0.03230 | BBB- |
| NPRL3305 | 0.00450 | BBB- |
| NPRL3306 | 0.20271 | BBB- |
| NPRL3307 | 0.00220 | BBB- |
| NPRL3308 | 0.35303 | BBB- |
| NPRL3309 | 0.01798 | BBB- |
| NPRL3310 | 0.93878 | BBB+ |
| NPRL3311 | 0.06233 | BBB- |
| NPRL3312 | 0.29009 | BBB- |
| NPRL3313 | 0.05900 | BBB- |
| NPRL3315 | 0.00042 | BBB- |
| NPRL3316 | 0.00449 | BBB- |
| NPRL3317 | 0.03115 | BBB- |
| NPRL3319 | 0.00028 | BBB- |
| NPRL3321 | 0.00380 | BBB- |
| NPRL3323 | 0.98739 | BBB+ |
| NPRL3324 | 0.97950 | BBB+ |
| NPRL3325 | 0.00031 | BBB- |
| NPRL3328 | 0.00009 | BBB- |
| NPRL3332 | 0.69128 | BBB+ |
| NPRL3333 | 0.09879 | BBB- |
| NPRL3334 | 0.00073 | BBB- |
| NPRL3335 | 0.93390 | BBB+ |
| NPRL3336 | 0.79027 | BBB+ |
| NPRL3337 | 0.00392 | BBB- |
| NPRL3338 | 0.00901 | BBB- |
| NPRL3339 | 0.02060 | BBB- |

|          |         |      |
|----------|---------|------|
| NPRL3340 | 0.18829 | BBB- |
| NPRL3341 | 0.80426 | BBB+ |
| NPRL3342 | 0.16148 | BBB- |
| NPRL3343 | 0.64251 | BBB+ |
| NPRL3344 | 0.63458 | BBB+ |
| NPRL3346 | 0.99762 | BBB+ |
| NPRL3347 | 0.98691 | BBB+ |
| NPRL3348 | 0.99774 | BBB+ |
| NPRL3349 | 0.99871 | BBB+ |
| NPRL3350 | 0.91638 | BBB+ |
| NPRL3352 | 0.98158 | BBB+ |
| NPRL3353 | 0.99823 | BBB+ |
| NPRL3354 | 0.99622 | BBB+ |
| NPRL3355 | 0.99802 | BBB+ |
| NPRL3356 | 0.99851 | BBB+ |
| NPRL3357 | 0.96470 | BBB+ |
| NPRL3359 | 0.86872 | BBB+ |
| NPRL3360 | 0.99335 | BBB+ |
| NPRL3361 | 0.01712 | BBB- |
| NPRL3362 | 0.09598 | BBB- |
| NPRL3363 | 0.26413 | BBB- |
| NPRL3364 | 0.01950 | BBB- |
| NPRL3365 | 0.05679 | BBB- |
| NPRL3366 | 0.13044 | BBB- |
| NPRL3367 | 0.00507 | BBB- |
| NPRL3368 | 0.35348 | BBB- |
| NPRL3369 | 0.32007 | BBB- |
| NPRL3370 | 0.48150 | BBB- |
| NPRL3372 | 0.80605 | BBB+ |
| NPRL3373 | 0.88022 | BBB+ |
| NPRL3374 | 0.00616 | BBB- |
| NPRL3375 | 0.10392 | BBB- |
| NPRL3376 | 0.30339 | BBB- |
| NPRL3377 | 0.00077 | BBB- |
| NPRL3378 | 0.66910 | BBB+ |
| NPRL3379 | 0.78555 | BBB+ |
| NPRL3380 | 0.30490 | BBB- |
| NPRL3381 | 0.67824 | BBB+ |
| NPRL3382 | 0.59922 | BBB+ |
| NPRL3383 | 0.79610 | BBB+ |
| NPRL3386 | 0.92396 | BBB+ |
| NPRL3390 | 0.11870 | BBB- |
| NPRL3391 | 0.36982 | BBB- |
| NPRL3393 | 0.98181 | BBB+ |
| NPRL3394 | 0.84155 | BBB+ |
| NPRL3395 | 0.00142 | BBB- |
| NPRL3396 | 0.02247 | BBB- |
| NPRL3397 | 0.53286 | BBB+ |
| NPRL3399 | 0.75473 | BBB+ |
| NPRL3400 | 0.02096 | BBB- |
| NPRL3401 | 0.89425 | BBB+ |
| NPRL3402 | 0.01502 | BBB- |
| NPRL3403 | 0.01740 | BBB- |
| NPRL3404 | 0.00731 | BBB- |
| NPRL3405 | 0.30511 | BBB- |
| NPRL3406 | 0.07938 | BBB- |
| NPRL3407 | 0.02467 | BBB- |

|                  |         |      |
|------------------|---------|------|
| NPRL3416         | 0.95637 | BBB+ |
| NPRL3417         | 0.84872 | BBB+ |
| NPRL3426         | 0.22678 | BBB- |
| NPRL3429         | 0.11914 | BBB- |
| NPRL3430         | 0.03285 | BBB- |
| NPRL3431         | 0.03119 | BBB- |
| NPRL3434         | 0.00883 | BBB- |
| NPRL3437         | 0.00048 | BBB- |
| NPRL3441         | 0.00395 | BBB- |
| NPRL3448         | 0.07129 | BBB- |
| NPRL3449         | 0.04891 | BBB- |
| NPRL3459         | 0.97965 | BBB+ |
| NPRL3462         | 0.44509 | BBB- |
| NPRL3463         | 0.85344 | BBB+ |
| NPRL3464         | 0.55125 | BBB+ |
| NPRL3465         | 0.06148 | BBB- |
| NPRL3466         | 0.83826 | BBB+ |
| NPRL3467         | 0.16636 | BBB- |
| NPRL3468         | 0.98180 | BBB+ |
| NPRL3469         | 0.87459 | BBB+ |
| NPRL3470         | 0.93573 | BBB+ |
| NPRL3471         | 0.92971 | BBB+ |
| NPRL3472         | 0.04641 | BBB- |
| NPRL3473         | 0.08759 | BBB- |
| NPRL3474         | 0.58136 | BBB+ |
| NPRL3475         | 0.72464 | BBB+ |
| NPRL3476         | 0.41644 | BBB- |
| NPRL3478         | 0.62066 | BBB+ |
| NPRL3479         | 0.77966 | BBB+ |
| NPRL3480         | 0.55331 | BBB+ |
| NPRL3481         | 0.37301 | BBB- |
| NPRL3482         | 0.79066 | BBB+ |
| NPRL3483         | 0.79164 | BBB+ |
| NPRL3484         | 0.05342 | BBB- |
| NPRL3485         | 0.14157 | BBB- |
| NPRL3486         | 0.64434 | BBB+ |
| NPRL3487         | 0.20832 | BBB- |
| NPRL3488         | 0.08943 | BBB- |
| NPRL3489         | 0.01488 | BBB- |
| NPRL3491         | 0.92546 | BBB+ |
| NPRL3492         | 0.93988 | BBB+ |
| NPRL3494         | 0.93176 | BBB+ |
| NPRL3495         | 0.68722 | BBB+ |
| NPRL3496         | 0.82070 | BBB+ |
| NPRL3498         | 0.97551 | BBB+ |
| NPRL3499         | 0.89892 | BBB+ |
| NPRL3500+A79:K79 | 0.69584 | BBB+ |
| NPRL3501         | 0.99989 | BBB+ |
| NPRL3502         | 0.96127 | BBB+ |
| NPRL3503         | 0.98328 | BBB+ |
| NPRL3504         | 0.71078 | BBB+ |
| NPRL3505         | 0.24988 | BBB- |
| NPRL3506         | 0.95408 | BBB+ |
| NPRL3507         | 0.92698 | BBB+ |
| NPRL3508         | 0.99883 | BBB+ |
| NPRL3509         | 0.96884 | BBB+ |
| NPRL3510         | 0.94995 | BBB+ |

|          |         |      |
|----------|---------|------|
| NPRL3511 | 0.99795 | BBB+ |
| NPRL3512 | 0.99008 | BBB+ |
| NPRL3513 | 0.95424 | BBB+ |
| NPRL3514 | 0.84682 | BBB+ |
| NPRL3515 | 0.99947 | BBB+ |
| NPRL3516 | 0.99456 | BBB+ |
| NPRL3517 | 0.96595 | BBB+ |
| NPRL3518 | 0.96174 | BBB+ |
| NPRL3519 | 0.99559 | BBB+ |
| NPRL3520 | 0.13224 | BBB- |
| NPRL3521 | 0.49588 | BBB- |
| NPRL3522 | 0.04155 | BBB- |
| NPRL3523 | 0.17181 | BBB- |
| NPRL3524 | 0.23305 | BBB- |
| NPRL3525 | 0.79091 | BBB+ |
| NPRL3526 | 0.51154 | BBB+ |
| NPRL3527 | 0.64101 | BBB+ |
| NPRL3528 | 0.87696 | BBB+ |
| NPRL3529 | 0.89873 | BBB+ |
| NPRL3530 | 0.46309 | BBB- |
| NPRL3531 | 0.91777 | BBB+ |
| NPRL3532 | 0.37194 | BBB- |
| NPRL3533 | 0.06627 | BBB- |
| NPRL3536 | 0.16622 | BBB- |
| NPRL3537 | 0.00072 | BBB- |
| NPRL3538 | 0.81554 | BBB+ |
| NPRL3539 | 0.28208 | BBB- |
| NPRL3540 | 0.78919 | BBB+ |
| NPRL3541 | 0.56277 | BBB+ |
| NPRL3542 | 0.78161 | BBB+ |
| NPRL3543 | 0.75892 | BBB+ |
| NPRL3544 | 0.18587 | BBB- |
| NPRL3545 | 0.00311 | BBB- |
| NPRL3547 | 0.53266 | BBB+ |
| NPRL3549 | 0.05411 | BBB- |
| NPRL3551 | 0.00840 | BBB- |
| NPRL3554 | 0.12550 | BBB- |
| NPRL3555 | 0.09342 | BBB- |
| NPRL3556 | 0.19136 | BBB- |
| NPRL3557 | 0.37996 | BBB- |
| NPRL3558 | 0.40546 | BBB- |
| NPRL3559 | 0.28231 | BBB- |
| NPRL3561 | 0.14611 | BBB- |
| NPRL3562 | 0.01949 | BBB- |
| NPRL3564 | 0.00126 | BBB- |
| NPRL3565 | 0.00132 | BBB- |
| NPRL3566 | 0.02965 | BBB- |
| NPRL3567 | 0.03754 | BBB- |
| NPRL3568 | 0.02409 | BBB- |
| NPRL3569 | 0.05696 | BBB- |
| NPRL3572 | 0.60808 | BBB+ |
| NPRL3573 | 0.37896 | BBB- |
| NPRL3574 | 0.90130 | BBB+ |
| NPRL3575 | 0.93467 | BBB+ |
| NPRL3576 | 0.00145 | BBB- |
| NPRL3577 | 0.97874 | BBB+ |
| NPRL3578 | 0.93307 | BBB+ |

|          |         |      |
|----------|---------|------|
| NPRL3579 | 0.99520 | BBB+ |
| NPRL3580 | 0.74140 | BBB+ |
| NPRL3581 | 0.96000 | BBB+ |
| NPRL3582 | 0.69936 | BBB+ |
| NPRL3583 | 0.98101 | BBB+ |
| NPRL3584 | 0.80118 | BBB+ |
| NPRL3585 | 0.88578 | BBB+ |
| NPRL3586 | 0.99245 | BBB+ |
| NPRL3587 | 0.82425 | BBB+ |
| NPRL3588 | 0.87796 | BBB+ |
| NPRL3589 | 0.33434 | BBB- |
| NPRL3590 | 0.95214 | BBB+ |
| NPRL3591 | 0.92858 | BBB+ |
| NPRL3592 | 0.61969 | BBB+ |
| NPRL3593 | 0.90651 | BBB+ |
| NPRL3594 | 0.00368 | BBB- |
| NPRL3595 | 0.12147 | BBB- |
| NPRL3597 | 0.00010 | BBB- |
| NPRL3599 | 0.00687 | BBB- |
| NPRL3600 | 0.00125 | BBB- |
| NPRL3601 | 0.01468 | BBB- |
| NPRL3602 | 0.01034 | BBB- |
| NPRL3603 | 0.00003 | BBB- |
| NPRL3604 | 0.00129 | BBB- |
| NPRL3605 | 0.00188 | BBB- |
| NPRL3606 | 0.00087 | BBB- |
| NPRL3607 | 0.05893 | BBB- |
| NPRL3608 | 0.69520 | BBB+ |
| NPRL3609 | 0.01755 | BBB- |
| NPRL3610 | 0.02205 | BBB- |
| NPRL3612 | 0.99921 | BBB+ |
| NPRL3613 | 0.99689 | BBB+ |
| NPRL3614 | 0.99813 | BBB+ |
| NPRL3616 | 0.39959 | BBB- |
| NPRL3617 | 0.99238 | BBB+ |
| NPRL3618 | 0.93210 | BBB+ |
| NPRL3619 | 0.67298 | BBB+ |
| NPRL3620 | 0.12757 | BBB- |
| NPRL3622 | 0.97700 | BBB+ |
| NPRL3623 | 0.57287 | BBB+ |
| NPRL3624 | 0.88336 | BBB+ |
| NPRL3625 | 0.86026 | BBB+ |
| NPRL3627 | 0.91574 | BBB+ |
| NPRL3628 | 0.01966 | BBB- |
| NPRL3629 | 0.00124 | BBB- |
| NPRL3630 | 0.65003 | BBB+ |
| NPRL3631 | 0.87850 | BBB+ |
| NPRL3632 | 0.50246 | BBB+ |
| NPRL3633 | 0.00210 | BBB- |
| NPRL3634 | 0.94717 | BBB+ |
| NPRL3635 | 0.22526 | BBB- |
| NPRL3636 | 0.03469 | BBB- |
| NPRL3637 | 0.00260 | BBB- |
| NPRL3638 | 0.67597 | BBB+ |
| NPRL3639 | 0.54311 | BBB+ |
| NPRL3641 | 0.74437 | BBB+ |
| NPRL3642 | 0.97761 | BBB+ |

|          |         |      |
|----------|---------|------|
| NPRL3644 | 0.99543 | BBB+ |
| NPRL3645 | 0.86062 | BBB+ |
| NPRL3646 | 0.25106 | BBB- |
| NPRL3647 | 0.78166 | BBB+ |
| NPRL3648 | 0.58074 | BBB+ |
| NPRL3649 | 0.95700 | BBB+ |
| NPRL3650 | 0.95145 | BBB+ |
| NPRL3652 | 0.03785 | BBB- |
| NPRL3653 | 0.37251 | BBB- |
| NPRL3654 | 0.09584 | BBB- |
| NPRL3655 | 0.07052 | BBB- |
| NPRL3656 | 0.00032 | BBB- |
| NPRL3659 | 0.99594 | BBB+ |
| NPRL3660 | 0.96871 | BBB+ |
| NPRL3661 | 0.93537 | BBB+ |
| NPRL3665 | 0.84052 | BBB+ |
| NPRL3667 | 0.46020 | BBB- |
| NPRL3669 | 0.79339 | BBB+ |
| NPRL3671 | 0.97476 | BBB+ |
| NPRL3673 | 0.92631 | BBB+ |
| NPRL3674 | 0.99811 | BBB+ |
| NPRL3677 | 0.75410 | BBB+ |
| NPRL3678 | 0.90466 | BBB+ |
| NPRL3679 | 0.89841 | BBB+ |
| NPRL3680 | 0.97224 | BBB+ |
| NPRL3682 | 0.60299 | BBB+ |
| NPRL3684 | 0.56288 | BBB+ |
| NPRL3685 | 0.01209 | BBB- |
| NPRL3686 | 0.12414 | BBB- |
| NPRL3687 | 0.94737 | BBB+ |
| NPRL3688 | 0.40159 | BBB- |
| NPRL3690 | 0.04030 | BBB- |
| NPRL3691 | 0.00320 | BBB- |
| NPRL3692 | 0.05744 | BBB- |
| NPRL3693 | 0.00211 | BBB- |
| NPRL3694 | 0.14641 | BBB- |
| NPRL3695 | 0.02435 | BBB- |
| NPRL3696 | 0.09609 | BBB- |
| NPRL3697 | 0.09536 | BBB- |
| NPRL3698 | 0.89260 | BBB+ |
| NPRL3699 | 0.92040 | BBB+ |
| NPRL3700 | 0.91377 | BBB+ |
| NPRL3702 | 0.46512 | BBB- |
| NPRL3703 | 0.85562 | BBB+ |
| NPRL3704 | 0.08501 | BBB- |
| NPRL3705 | 0.85347 | BBB+ |
| NPRL3706 | 0.99683 | BBB+ |
| NPRL3707 | 0.06265 | BBB- |
| NPRL3708 | 0.81276 | BBB+ |
| NPRL3709 | 0.97448 | BBB+ |
| NPRL3710 | 0.98208 | BBB+ |
| NPRL3711 | 0.61101 | BBB+ |
| NPRL3712 | 0.94636 | BBB+ |
| NPRL3713 | 0.99307 | BBB+ |
| NPRL3714 | 0.99220 | BBB+ |
| NPRL3715 | 0.77007 | BBB+ |
| NPRL3716 | 0.93906 | BBB+ |



|          |         |      |
|----------|---------|------|
| NPRL3717 | 0.70899 | BBB+ |
| NPRL3718 | 0.87532 | BBB+ |
| NPRL3719 | 0.99684 | BBB+ |
| NPRL3720 | 0.77125 | BBB+ |
| NPRL3721 | 0.96562 | BBB+ |
| NPRL3722 | 0.29900 | BBB- |
| NPRL3723 | 0.25707 | BBB- |
| NPRL3724 | 0.99042 | BBB+ |
| NPRL3725 | 0.42828 | BBB- |
| NPRL3726 | 0.11972 | BBB- |
| NPRL3727 | 0.93853 | BBB+ |
| NPRL3728 | 0.98406 | BBB+ |
| NPRL3729 | 0.98932 | BBB+ |
| NPRL3730 | 0.99452 | BBB+ |
| NPRL3731 | 0.31918 | BBB- |
| NPRL3732 | 0.99463 | BBB+ |
| NPRL3733 | 0.99405 | BBB+ |
| NPRL3734 | 0.87496 | BBB+ |
| NPRL3735 | 0.97959 | BBB+ |
| NPRL3736 | 0.73468 | BBB+ |
| NPRL3737 | 0.05921 | BBB- |
| NPRL3739 | 0.23099 | BBB- |
| NPRL3740 | 0.25247 | BBB- |
| NPRL3741 | 0.98416 | BBB+ |
| NPRL3742 | 0.35544 | BBB- |
| NPRL3743 | 0.95091 | BBB+ |
| NPRL3744 | 0.99424 | BBB+ |
| NPRL3746 | 0.95177 | BBB+ |
| NPRL3747 | 0.94342 | BBB+ |
| NPRL3748 | 0.02398 | BBB- |
| NPRL3749 | 0.82890 | BBB+ |
| NPRL3750 | 0.92811 | BBB+ |
| NPRL3751 | 0.31342 | BBB- |
| NPRL3752 | 0.54087 | BBB+ |
| NPRL3753 | 0.89705 | BBB+ |
| NPRL3754 | 0.00132 | BBB- |
| NPRL3755 | 0.95098 | BBB+ |
| NPRL3756 | 0.93083 | BBB+ |
| NPRL3758 | 0.98571 | BBB+ |
| NPRL3759 | 0.99357 | BBB+ |
| NPRL3760 | 0.91367 | BBB+ |
| NPRL3761 | 0.99875 | BBB+ |
| NPRL3762 | 0.98743 | BBB+ |
| NPRL3763 | 0.99707 | BBB+ |
| NPRL3764 | 0.93773 | BBB+ |
| NPRL3765 | 0.52921 | BBB+ |
| NPRL3766 | 0.24431 | BBB- |
| NPRL3767 | 0.99658 | BBB+ |
| NPRL3768 | 0.88073 | BBB+ |
| NPRL3769 | 0.99157 | BBB+ |
| NPRL3770 | 0.99866 | BBB+ |
| NPRL3771 | 0.99422 | BBB+ |
| NPRL3772 | 0.99279 | BBB+ |
| NPRL3773 | 0.05715 | BBB- |
| NPRL3774 | 0.99066 | BBB+ |
| NPRL3775 | 0.99213 | BBB+ |
| NPRL3776 | 0.99821 | BBB+ |

|          |         |      |
|----------|---------|------|
| NPRL3777 | 0.99855 | BBB+ |
| NPRL3778 | 0.99456 | BBB+ |
| NPRL3779 | 0.98918 | BBB+ |
| NPRL3781 | 0.57055 | BBB+ |
| NPRL3782 | 0.32602 | BBB- |
| NPRL3783 | 0.38777 | BBB- |
| NPRL3785 | 0.86654 | BBB+ |
| NPRL3786 | 0.00134 | BBB- |
| NPRL3787 | 0.00475 | BBB- |
| NPRL3788 | 0.92865 | BBB+ |
| NPRL3792 | 0.92001 | BBB+ |
| NPRL3793 | 0.00025 | BBB- |
| NPRL3795 | 0.05617 | BBB- |
| NPRL3796 | 0.56382 | BBB+ |
| NPRL3797 | 0.00039 | BBB- |
| NPRL3798 | 0.98346 | BBB+ |
| NPRL3799 | 0.15001 | BBB- |
| NPRL3800 | 0.88659 | BBB+ |
| NPRL3801 | 0.00997 | BBB- |
| NPRL3802 | 0.00726 | BBB- |
| NPRL3803 | 0.00434 | BBB- |
| NPRL3804 | 0.68571 | BBB+ |
| NPRL3805 | 0.33422 | BBB- |
| NPRL3806 | 0.00834 | BBB- |
| NPRL3807 | 0.99670 | BBB+ |
| NPRL3808 | 0.00020 | BBB- |
| NPRL3809 | 0.00077 | BBB- |
| NPRL3812 | 0.00974 | BBB- |
| NPRL3813 | 0.00190 | BBB- |
| NPRL3814 | 0.00039 | BBB- |
| NPRL3815 | 0.00072 | BBB- |
| NPRL3817 | 0.00728 | BBB- |
| NPRL3818 | 0.31385 | BBB- |
| NPRL3819 | 0.26588 | BBB- |
| NPRL3820 | 0.10119 | BBB- |
| NPRL3821 | 0.85930 | BBB+ |
| NPRL3825 | 0.02367 | BBB- |
| NPRL3826 | 0.04296 | BBB- |
| NPRL3827 | 0.06840 | BBB- |
| NPRL3828 | 0.78090 | BBB+ |
| NPRL3829 | 0.00960 | BBB- |
| NPRL3830 | 0.00426 | BBB- |
| NPRL3831 | 0.04822 | BBB- |
| NPRL3832 | 0.01487 | BBB- |
| NPRL3833 | 0.01891 | BBB- |
| NPRL3834 | 0.01653 | BBB- |
| NPRL3835 | 0.33535 | BBB- |
| NPRL3837 | 0.31204 | BBB- |
| NPRL3839 | 0.00570 | BBB- |
| NPRL3840 | 0.00568 | BBB- |
| NPRL3841 | 0.03025 | BBB- |
| NPRL3842 | 0.02648 | BBB- |
| NPRL3843 | 0.00204 | BBB- |
| NPRL3844 | 0.73903 | BBB+ |
| NPRL3845 | 0.11935 | BBB- |
| NPRL3846 | 0.10615 | BBB- |
| NPRL3847 | 0.01064 | BBB- |

|          |         |      |
|----------|---------|------|
| NPRL3848 | 0.00757 | BBB- |
| NPRL3849 | 0.00710 | BBB- |
| NPRL3850 | 0.05683 | BBB- |
| NPRL3851 | 0.00166 | BBB- |
| NPRL3852 | 0.00161 | BBB- |
| NPRL3853 | 0.00114 | BBB- |
| NPRL3854 | 0.00067 | BBB- |
| NPRL3855 | 0.18990 | BBB- |
| NPRL3856 | 0.00056 | BBB- |
| NPRL3857 | 0.01592 | BBB- |
| NPRL3858 | 0.95724 | BBB+ |
| NPRL3863 | 0.98063 | BBB+ |
| NPRL3864 | 0.93827 | BBB+ |
| NPRL3865 | 0.93455 | BBB+ |
| NPRL3866 | 0.36938 | BBB- |
| NPRL3867 | 0.03946 | BBB- |
| NPRL3868 | 0.19211 | BBB- |
| NPRL3869 | 0.27469 | BBB- |
| NPRL3870 | 0.00323 | BBB- |
| NPRL3871 | 0.14326 | BBB- |
| NPRL3872 | 0.98191 | BBB+ |
| NPRL3873 | 0.96620 | BBB+ |
| NPRL3874 | 0.05403 | BBB- |
| NPRL3875 | 0.42505 | BBB- |
| NPRL3876 | 0.30295 | BBB- |
| NPRL3877 | 0.05278 | BBB- |
| NPRL3878 | 0.03366 | BBB- |
| NPRL3879 | 0.55932 | BBB+ |
| NPRL3880 | 0.23601 | BBB- |
| NPRL3881 | 0.05482 | BBB- |
| NPRL3883 | 0.01632 | BBB- |
| NPRL3885 | 0.00808 | BBB- |
| NPRL3888 | 0.07560 | BBB- |
| NPRL3889 | 0.02315 | BBB- |
| NPRL3890 | 0.89448 | BBB+ |
| NPRL3891 | 0.00017 | BBB- |
| NPRL3892 | 0.14962 | BBB- |
| NPRL3893 | 0.09328 | BBB- |
| NPRL3894 | 0.00501 | BBB- |
| NPRL3895 | 0.57387 | BBB+ |
| NPRL3896 | 0.82541 | BBB+ |
| NPRL3897 | 0.56998 | BBB+ |
| NPRL3898 | 0.85626 | BBB+ |
| NPRL3899 | 0.91503 | BBB+ |
| NPRL3900 | 0.75341 | BBB+ |
| NPRL3901 | 0.95752 | BBB+ |
| NPRL3902 | 0.94685 | BBB+ |
| NPRL3903 | 0.00293 | BBB- |
| NPRL3904 | 0.54661 | BBB+ |
| NPRL3905 | 0.13992 | BBB- |
| NPRL3906 | 0.11139 | BBB- |
| NPRL3908 | 0.03323 | BBB- |
| NPRL3909 | 0.00244 | BBB- |
| NPRL3910 | 0.74887 | BBB+ |
| NPRL3911 | 0.04425 | BBB- |
| NPRL3914 | 0.00865 | BBB- |
| NPRL3915 | 0.99355 | BBB+ |

|          |         |      |
|----------|---------|------|
| NPRL3916 | 0.96932 | BBB+ |
| NPRL3917 | 0.99375 | BBB+ |
| NPRL3918 | 0.99817 | BBB+ |
| NPRL3919 | 0.97231 | BBB+ |
| NPRL3920 | 0.83756 | BBB+ |
| NPRL3921 | 0.99559 | BBB+ |
| NPRL3922 | 0.99486 | BBB+ |
| NPRL3923 | 0.98483 | BBB+ |
| NPRL3924 | 0.05887 | BBB- |
| NPRL3925 | 0.00041 | BBB- |
| NPRL3926 | 0.00037 | BBB- |
| NPRL3927 | 0.00031 | BBB- |
| NPRL3930 | 0.19350 | BBB- |
| NPRL3931 | 0.54216 | BBB+ |
| NPRL3932 | 0.60171 | BBB+ |
| NPRL3933 | 0.39294 | BBB- |
| NPRL3936 | 0.01255 | BBB- |
| NPRL3937 | 0.02447 | BBB- |
| NPRL3939 | 0.00220 | BBB- |
| NPRL3940 | 0.00031 | BBB- |
| NPRL3941 | 0.04867 | BBB- |
| NPRL3942 | 0.01556 | BBB- |
| NPRL3943 | 0.03737 | BBB- |
| NPRL3944 | 0.11682 | BBB- |
| NPRL3945 | 0.01768 | BBB- |
| NPRL3946 | 0.00092 | BBB- |
| NPRL3947 | 0.00926 | BBB- |
| NPRL3949 | 0.05785 | BBB- |
| NPRL3951 | 0.09914 | BBB- |
| NPRL3953 | 0.04622 | BBB- |
| NPRL3954 | 0.00173 | BBB- |
| NPRL3955 | 0.00949 | BBB- |
| NPRL3956 | 0.12670 | BBB- |
| NPRL3957 | 0.93449 | BBB+ |
| NPRL3958 | 0.01327 | BBB- |
| NPRL3960 | 0.06355 | BBB- |
| NPRL3961 | 0.49487 | BBB- |
| NPRL3962 | 0.02298 | BBB- |
| NPRL3963 | 0.87914 | BBB+ |
| NPRL3964 | 0.56937 | BBB+ |
| NPRL3965 | 0.02263 | BBB- |
| NPRL3966 | 0.45116 | BBB- |
| NPRL3967 | 0.00708 | BBB- |
| NPRL3968 | 0.09864 | BBB- |
| NPRL3969 | 0.00107 | BBB- |
| NPRL3970 | 0.95734 | BBB+ |
| NPRL3971 | 0.90599 | BBB+ |
| NPRL3972 | 0.09945 | BBB- |
| NPRL3973 | 0.12821 | BBB- |
| NPRL3974 | 0.00338 | BBB- |
| NPRL3975 | 0.66130 | BBB+ |
| NPRL3976 | 0.03673 | BBB- |
| NPRL3977 | 0.05628 | BBB- |
| NPRL3978 | 0.02511 | BBB- |
| NPRL3979 | 0.00046 | BBB- |
| NPRL3980 | 0.20280 | BBB- |
| NPRL3982 | 0.00042 | BBB- |

|          |         |      |
|----------|---------|------|
| NPRL3983 | 0.07647 | BBB- |
| NPRL3984 | 0.92346 | BBB+ |
| NPRL3985 | 0.00080 | BBB- |
| NPRL3986 | 0.00128 | BBB- |
| NPRL3987 | 0.00169 | BBB- |
| NPRL3988 | 0.00073 | BBB- |
| NPRL3989 | 0.00052 | BBB- |
| NPRL3990 | 0.63219 | BBB+ |
| NPRL3992 | 0.00015 | BBB- |
| NPRL3994 | 0.41035 | BBB- |
| NPRL3995 | 0.04576 | BBB- |
| NPRL3996 | 0.03507 | BBB- |
| NPRL3997 | 0.06100 | BBB- |
| NPRL3998 | 0.13006 | BBB- |
| NPRL3999 | 0.08542 | BBB- |
| NPRL4000 | 0.18632 | BBB- |
| NPRL4001 | 0.00018 | BBB- |
| NPRL4002 | 0.30561 | BBB- |
| NPRL4003 | 0.71589 | BBB+ |
| NPRL4004 | 0.10618 | BBB- |
| NPRL4006 | 0.00467 | BBB- |
| NPRL4007 | 0.00908 | BBB- |
| NPRL4008 | 0.00943 | BBB- |
| NPRL4009 | 0.39454 | BBB- |
| NPRL4010 | 0.91712 | BBB+ |
| NPRL4011 | 0.00276 | BBB- |
| NPRL4012 | 0.30164 | BBB- |
| NPRL4013 | 0.43179 | BBB- |
| NPRL4014 | 0.61741 | BBB+ |
| NPRL4016 | 0.02210 | BBB- |
| NPRL4017 | 0.35706 | BBB- |
| NPRL4018 | 0.01530 | BBB- |
| NPRL4019 | 0.42890 | BBB- |
| NPRL4020 | 0.87586 | BBB+ |
| NPRL4021 | 0.98304 | BBB+ |
| NPRL4022 | 0.00445 | BBB- |
| NPRL4023 | 0.08210 | BBB- |
| NPRL4025 | 0.86885 | BBB+ |
| NPRL4027 | 0.10585 | BBB- |
| NPRL4028 | 0.11893 | BBB- |
| NPRL4030 | 0.01475 | BBB- |
| NPRL4031 | 0.45484 | BBB- |
| NPRL4032 | 0.28226 | BBB- |
| NPRL4033 | 0.44440 | BBB- |
| NPRL4034 | 0.89844 | BBB+ |
| NPRL4035 | 0.36040 | BBB- |
| NPRL4036 | 0.35500 | BBB- |
| NPRL4037 | 0.43553 | BBB- |
| NPRL4038 | 0.72835 | BBB+ |
| NPRL4039 | 0.87881 | BBB+ |
| NPRL4040 | 0.04739 | BBB- |
| NPRL4041 | 0.51208 | BBB+ |
| NPRL4042 | 0.66459 | BBB+ |
| NPRL4043 | 0.54514 | BBB+ |
| NPRL4044 | 0.92532 | BBB+ |
| NPRL4046 | 0.94330 | BBB+ |
| NPRL4047 | 0.88222 | BBB+ |

|          |         |      |
|----------|---------|------|
| NPRL4048 | 0.94929 | BBB+ |
| NPRL4049 | 0.16499 | BBB- |
| NPRL4050 | 0.21729 | BBB- |
| NPRL4051 | 0.90749 | BBB+ |
| NPRL4052 | 0.45754 | BBB- |
| NPRL4054 | 0.63236 | BBB+ |
| NPRL4055 | 0.90582 | BBB+ |
| NPRL4056 | 0.92750 | BBB+ |
| NPRL4057 | 0.89091 | BBB+ |
| NPRL4058 | 0.74238 | BBB+ |
| NPRL4059 | 0.85178 | BBB+ |
| NPRL4060 | 0.87906 | BBB+ |
| NPRL4061 | 0.94217 | BBB+ |
| NPRL4063 | 0.67231 | BBB+ |
| NPRL4064 | 0.05636 | BBB- |
| NPRL4065 | 0.03463 | BBB- |
| NPRL4066 | 0.90902 | BBB+ |
| NPRL4067 | 0.07484 | BBB- |
| NPRL4068 | 0.74263 | BBB+ |
| NPRL4069 | 0.74367 | BBB+ |
| NPRL4070 | 0.57625 | BBB+ |
| NPRL4071 | 0.99480 | BBB+ |
| NPRL4072 | 0.02609 | BBB- |
| NPRL4073 | 0.15521 | BBB- |
| NPRL4074 | 0.28306 | BBB- |
| NPRL4075 | 0.20431 | BBB- |
| NPRL4076 | 0.93035 | BBB+ |
| NPRL4077 | 0.59080 | BBB+ |
| NPRL4078 | 0.93470 | BBB+ |
| NPRL4079 | 0.91944 | BBB+ |
| NPRL4080 | 0.99932 | BBB+ |
| NPRL4082 | 0.74615 | BBB+ |
| NPRL4083 | 0.69119 | BBB+ |
| NPRL4085 | 0.46398 | BBB- |
| NPRL4086 | 0.57453 | BBB+ |
| NPRL4087 | 0.76959 | BBB+ |
| NPRL4088 | 0.79866 | BBB+ |
| NPRL4089 | 0.76395 | BBB+ |
| NPRL4090 | 0.75966 | BBB+ |
| NPRL4091 | 0.71021 | BBB+ |
| NPRL4092 | 0.75926 | BBB+ |
| NPRL4093 | 0.89565 | BBB+ |
| NPRL4094 | 0.86977 | BBB+ |
| NPRL4095 | 0.99449 | BBB+ |
| NPRL4096 | 0.74828 | BBB+ |
| NPRL4097 | 0.54361 | BBB+ |
| NPRL4098 | 0.98470 | BBB+ |
| NPRL4099 | 0.71006 | BBB+ |
| NPRL4100 | 0.87395 | BBB+ |
| NPRL4102 | 0.49151 | BBB- |
| NPRL4103 | 0.42943 | BBB- |
| NPRL4104 | 0.23633 | BBB- |
| NPRL4108 | 0.98362 | BBB+ |
| NPRL4112 | 0.48382 | BBB- |
| NPRL4113 | 0.99285 | BBB+ |
| NPRL4114 | 0.97699 | BBB+ |
| NPRL4115 | 0.40159 | BBB- |

|          |         |      |
|----------|---------|------|
| NPRL4117 | 0.15750 | BBB- |
| NPRL4118 | 0.29237 | BBB- |
| NPRL4119 | 0.42090 | BBB- |
| NPRL4120 | 0.18055 | BBB- |
| NPRL4121 | 0.13124 | BBB- |
| NPRL4123 | 0.42732 | BBB- |
| NPRL4124 | 0.02917 | BBB- |
| NPRL4127 | 0.37628 | BBB- |
| NPRL4128 | 0.51558 | BBB+ |
| NPRL4129 | 0.00971 | BBB- |
| NPRL4130 | 0.03452 | BBB- |
| NPRL4131 | 0.85931 | BBB+ |
| NPRL4132 | 0.55781 | BBB+ |
| NPRL4133 | 0.06823 | BBB- |
| NPRL4134 | 0.76983 | BBB+ |
| NPRL4135 | 0.74745 | BBB+ |
| NPRL4137 | 0.13149 | BBB- |
| NPRL4138 | 0.83815 | BBB+ |
| NPRL4139 | 0.02699 | BBB- |
| NPRL4140 | 0.80264 | BBB+ |
| NPRL4141 | 0.81697 | BBB+ |
| NPRL4142 | 0.20076 | BBB- |
| NPRL4143 | 0.06834 | BBB- |
| NPRL4144 | 0.45582 | BBB- |
| NPRL4145 | 0.97433 | BBB+ |
| NPRL4148 | 0.98451 | BBB+ |
| NPRL4149 | 0.00147 | BBB- |
| NPRL4150 | 0.05937 | BBB- |
| NPRL4152 | 0.00651 | BBB- |
| NPRL4155 | 0.63485 | BBB+ |
| NPRL4156 | 0.01248 | BBB- |
| NPRL4157 | 0.82758 | BBB+ |
| NPRL4158 | 0.68861 | BBB+ |
| NPRL4159 | 0.98992 | BBB+ |
| NPRL4160 | 0.99647 | BBB+ |
| NPRL4161 | 0.98784 | BBB+ |
| NPRL4162 | 0.50387 | BBB+ |
| NPRL4163 | 0.04696 | BBB- |
| NPRL4164 | 0.74730 | BBB+ |
| NPRL4165 | 0.82626 | BBB+ |
| NPRL4166 | 0.86972 | BBB+ |
| NPRL4167 | 0.83080 | BBB+ |
| NPRL4169 | 0.12867 | BBB- |
| NPRL4170 | 0.85918 | BBB+ |
| NPRL4171 | 0.09026 | BBB- |
| NPRL4172 | 0.16817 | BBB- |
| NPRL4173 | 0.08041 | BBB- |
| NPRL4175 | 0.02075 | BBB- |
| NPRL4176 | 0.01049 | BBB- |
| NPRL4177 | 0.40582 | BBB- |
| NPRL4178 | 0.21777 | BBB- |
| NPRL4180 | 0.11105 | BBB- |
| NPRL4182 | 0.76226 | BBB+ |
| NPRL4184 | 0.03047 | BBB- |
| NPRL4185 | 0.06612 | BBB- |
| NPRL4186 | 0.18543 | BBB- |
| NPRL4187 | 0.21906 | BBB- |

|          |         |      |
|----------|---------|------|
| NPRL4188 | 0.18693 | BBB- |
| NPRL4189 | 0.46447 | BBB- |
| NPRL4190 | 0.05935 | BBB- |
| NPRL4191 | 0.64199 | BBB+ |
| NPRL4192 | 0.06718 | BBB- |
| NPRL4193 | 0.86680 | BBB+ |
| NPRL4194 | 0.79681 | BBB+ |
| NPRL4195 | 0.05468 | BBB- |
| NPRL4197 | 0.73116 | BBB+ |
| NPRL4198 | 0.73751 | BBB+ |
| NPRL4199 | 0.62531 | BBB+ |
| NPRL4200 | 0.19811 | BBB- |
| NPRL4201 | 0.05772 | BBB- |
| NPRL4202 | 0.68845 | BBB+ |
| NPRL4203 | 0.42191 | BBB- |
| NPRL4204 | 0.21774 | BBB- |
| NPRL4206 | 0.26321 | BBB- |
| NPRL4207 | 0.91549 | BBB+ |
| NPRL4208 | 0.67200 | BBB+ |
| NPRL4209 | 0.13993 | BBB- |
| NPRL4210 | 0.16284 | BBB- |
| NPRL4211 | 0.72596 | BBB+ |
| NPRL4212 | 0.56857 | BBB+ |
| NPRL4213 | 0.48042 | BBB- |
| NPRL4214 | 0.28580 | BBB- |
| NPRL4215 | 0.74200 | BBB+ |
| NPRL4216 | 0.68991 | BBB+ |
| NPRL4217 | 0.96658 | BBB+ |
| NPRL4218 | 0.79433 | BBB+ |
| NPRL4219 | 0.20081 | BBB- |
| NPRL4220 | 0.12525 | BBB- |
| NPRL4221 | 0.86773 | BBB+ |
| NPRL4222 | 0.55308 | BBB+ |
| NPRL4223 | 0.85474 | BBB+ |
| NPRL4224 | 0.64000 | BBB+ |
| NPRL4225 | 0.56177 | BBB+ |
| NPRL4226 | 0.78983 | BBB+ |
| NPRL4227 | 0.80630 | BBB+ |
| NPRL4228 | 0.70945 | BBB+ |
| NPRL4229 | 0.85191 | BBB+ |
| NPRL4230 | 0.15658 | BBB- |
| NPRL4231 | 0.45327 | BBB- |
| NPRL4232 | 0.18226 | BBB- |
| NPRL4233 | 0.41479 | BBB- |
| NPRL4234 | 0.82113 | BBB+ |
| NPRL4235 | 0.89294 | BBB+ |
| NPRL4237 | 0.92713 | BBB+ |
| NPRL4238 | 0.03770 | BBB- |
| NPRL4239 | 0.17309 | BBB- |
| NPRL4240 | 0.29258 | BBB- |
| NPRL4241 | 0.20594 | BBB- |
| NPRL4242 | 0.55192 | BBB+ |
| NPRL4243 | 0.19513 | BBB- |
| NPRL4252 | 0.32862 | BBB- |
| NPRL4255 | 0.99987 | BBB+ |
| NPRL4256 | 0.99764 | BBB+ |
| NPRL4257 | 0.99782 | BBB+ |



|          |         |      |
|----------|---------|------|
| NPRL4260 | 0.00151 | BBB- |
| NPRL4261 | 0.51842 | BBB+ |
| NPRL4263 | 0.00346 | BBB- |
| NPRL4264 | 0.45759 | BBB- |
| NPRL4265 | 0.00284 | BBB- |
| NPRL4266 | 0.69047 | BBB+ |
| NPRL4267 | 0.00011 | BBB- |
| NPRL4271 | 0.99629 | BBB+ |
| NPRL4274 | 0.91644 | BBB+ |
| NPRL4275 | 0.24469 | BBB- |
| NPRL4277 | 0.55232 | BBB+ |
| NPRL4278 | 0.74207 | BBB+ |
| NPRL4279 | 0.78599 | BBB+ |
| NPRL4280 | 0.96334 | BBB+ |
| NPRL4281 | 0.87871 | BBB+ |
| NPRL4283 | 0.11788 | BBB- |
| NPRL4284 | 0.65419 | BBB+ |
| NPRL4285 | 0.98976 | BBB+ |
| NPRL4286 | 0.99478 | BBB+ |
| NPRL4287 | 0.54969 | BBB+ |
| NPRL4288 | 0.93217 | BBB+ |
| NPRL4289 | 0.36536 | BBB- |
| NPRL4290 | 0.95864 | BBB+ |
| NPRL4292 | 0.50357 | BBB+ |
| NPRL4293 | 0.89897 | BBB+ |
| NPRL4294 | 0.33783 | BBB- |
| NPRL4295 | 0.99451 | BBB+ |
| NPRL4296 | 0.99011 | BBB+ |
| NPRL4298 | 0.88663 | BBB+ |
| NPRL4299 | 0.84822 | BBB+ |
| NPRL4300 | 0.96130 | BBB+ |
| NPRL4301 | 0.54873 | BBB+ |
| NPRL4302 | 0.53852 | BBB+ |
| NPRL4303 | 0.71813 | BBB+ |
| NPRL4304 | 0.52768 | BBB+ |
| NPRL4305 | 0.99632 | BBB+ |
| NPRL4306 | 0.91362 | BBB+ |
| NPRL4307 | 0.96152 | BBB+ |
| NPRL4309 | 0.99199 | BBB+ |
| NPRL4310 | 0.81640 | BBB+ |
| NPRL4311 | 0.97844 | BBB+ |
| NPRL4312 | 0.99614 | BBB+ |
| NPRL4313 | 0.10736 | BBB- |
| NPRL4315 | 0.99543 | BBB+ |
| NPRL4316 | 0.92516 | BBB+ |
| NPRL4317 | 0.95726 | BBB+ |
| NPRL4318 | 0.96879 | BBB+ |
| NPRL4319 | 0.99883 | BBB+ |
| NPRL4320 | 0.96699 | BBB+ |
| NPRL4321 | 0.99591 | BBB+ |
| NPRL4322 | 0.29964 | BBB- |
| NPRL4324 | 0.97106 | BBB+ |
| NPRL4328 | 0.42825 | BBB- |
| NPRL4329 | 0.95395 | BBB+ |
| NPRL4330 | 0.84242 | BBB+ |
| NPRL4331 | 0.04730 | BBB- |
| NPRL4334 | 0.97911 | BBB+ |

|          |         |      |
|----------|---------|------|
| NPRL4335 | 0.99592 | BBB+ |
| NPRL4337 | 0.84290 | BBB+ |
| NPRL4338 | 0.45631 | BBB- |
| NPRL4339 | 0.33738 | BBB- |
| NPRL4340 | 0.49852 | BBB- |
| NPRL4341 | 0.72233 | BBB+ |
| NPRL4342 | 0.26032 | BBB- |
| NPRL4343 | 0.90245 | BBB+ |
| NPRL4345 | 0.07988 | BBB- |
| NPRL4346 | 0.20149 | BBB- |
| NPRL4347 | 0.32890 | BBB- |
| NPRL4348 | 0.43199 | BBB- |
| NPRL4349 | 0.03449 | BBB- |
| NPRL4350 | 0.74095 | BBB+ |
| NPRL4351 | 0.19552 | BBB- |
| NPRL4352 | 0.76825 | BBB+ |
| NPRL4353 | 0.00935 | BBB- |
| NPRL4354 | 0.88307 | BBB+ |
| NPRL4355 | 0.74887 | BBB+ |
| NPRL4356 | 0.41112 | BBB- |
| NPRL4357 | 0.31812 | BBB- |
| NPRL4358 | 0.33973 | BBB- |
| NPRL4359 | 0.43589 | BBB- |
| NPRL4360 | 0.50321 | BBB+ |
| NPRL4361 | 0.86484 | BBB+ |
| NPRL4362 | 0.90445 | BBB+ |
| NPRL4363 | 0.90925 | BBB+ |
| NPRL4364 | 0.75470 | BBB+ |
| NPRL4365 | 0.98047 | BBB+ |
| NPRL4366 | 0.72109 | BBB+ |
| NPRL4367 | 0.47960 | BBB- |
| NPRL4369 | 0.58096 | BBB+ |
| NPRL4370 | 0.80176 | BBB+ |
| NPRL4372 | 0.22599 | BBB- |
| NPRL4373 | 0.97593 | BBB+ |
| NPRL4374 | 0.35927 | BBB- |
| NPRL4375 | 0.80090 | BBB+ |
| NPRL4376 | 0.62165 | BBB+ |
| NPRL4377 | 0.09094 | BBB- |
| NPRL4378 | 0.87013 | BBB+ |
| NPRL4379 | 0.06726 | BBB- |
| NPRL4380 | 0.79786 | BBB+ |
| NPRL4381 | 0.73377 | BBB+ |
| NPRL4382 | 0.72277 | BBB+ |
| NPRL4383 | 0.89806 | BBB+ |
| NPRL4384 | 0.66955 | BBB+ |
| NPRL4385 | 0.98083 | BBB+ |
| NPRL4386 | 0.00270 | BBB- |
| NPRL4387 | 0.21950 | BBB- |
| NPRL4388 | 0.08749 | BBB- |
| NPRL4389 | 0.01653 | BBB- |
| NPRL4391 | 0.90127 | BBB+ |
| NPRL4392 | 0.00058 | BBB- |
| NPRL4393 | 0.89076 | BBB+ |
| NPRL4394 | 0.00078 | BBB- |
| NPRL4395 | 0.00041 | BBB- |
| NPRL4396 | 0.00377 | BBB- |

|          |         |      |
|----------|---------|------|
| NPRL4397 | 0.55573 | BBB+ |
| NPRL4398 | 0.00150 | BBB- |
| NPRL4399 | 0.28745 | BBB- |
| NPRL4400 | 0.51389 | BBB+ |
| NPRL4401 | 0.54242 | BBB+ |
| NPRL4402 | 0.43549 | BBB- |
| NPRL4403 | 0.86849 | BBB+ |
| NPRL4404 | 0.57885 | BBB+ |
| NPRL4405 | 0.93584 | BBB+ |
| NPRL4406 | 0.94760 | BBB+ |
| NPRL4407 | 0.95577 | BBB+ |
| NPRL4408 | 0.93649 | BBB+ |
| NPRL4409 | 0.98586 | BBB+ |
| NPRL4410 | 0.93789 | BBB+ |
| NPRL4411 | 0.97338 | BBB+ |
| NPRL4413 | 0.97832 | BBB+ |
| NPRL4414 | 0.40227 | BBB- |
| NPRL4415 | 0.90462 | BBB+ |
| NPRL4416 | 0.89769 | BBB+ |
| NPRL4417 | 0.92398 | BBB+ |
| NPRL4418 | 0.95361 | BBB+ |
| NPRL4419 | 0.90049 | BBB+ |
| NPRL4420 | 0.95185 | BBB+ |
| NPRL4421 | 0.89099 | BBB+ |
| NPRL4422 | 0.82808 | BBB+ |
| NPRL4423 | 0.67422 | BBB+ |
| NPRL4424 | 0.92782 | BBB+ |
| NPRL4425 | 0.55048 | BBB+ |
| NPRL4426 | 0.58501 | BBB+ |
| NPRL4427 | 0.41571 | BBB- |
| NPRL4428 | 0.43920 | BBB- |
| NPRL4429 | 0.86836 | BBB+ |
| NPRL4430 | 0.42967 | BBB- |
| NPRL4431 | 0.00095 | BBB- |
| NPRL4432 | 0.00564 | BBB- |
| NPRL4433 | 0.99138 | BBB+ |
| NPRL4434 | 0.00389 | BBB- |
| NPRL4435 | 0.98672 | BBB+ |
| NPRL4436 | 0.00094 | BBB- |
| NPRL4437 | 0.95837 | BBB+ |
| NPRL4438 | 0.99112 | BBB+ |
| NPRL4439 | 0.95789 | BBB+ |
| NPRL4440 | 0.99568 | BBB+ |
| NPRL4441 | 0.94700 | BBB+ |
| NPRL4443 | 0.20537 | BBB- |
| NPRL4444 | 0.79548 | BBB+ |
| NPRL4446 | 0.88321 | BBB+ |
| NPRL4447 | 0.44232 | BBB- |
| NPRL4448 | 0.73846 | BBB+ |
| NPRL4449 | 0.42619 | BBB- |
| NPRL4450 | 0.89615 | BBB+ |
| NPRL4451 | 0.94214 | BBB+ |
| NPRL4452 | 0.59729 | BBB+ |
| NPRL4453 | 0.52187 | BBB+ |
| NPRL4454 | 0.11551 | BBB- |
| NPRL4455 | 0.81085 | BBB+ |
| NPRL4456 | 0.59479 | BBB+ |

|          |         |      |
|----------|---------|------|
| NPRL4457 | 0.98887 | BBB+ |
| NPRL4458 | 0.30352 | BBB- |
| NPRL4459 | 0.94064 | BBB+ |
| NPRL4460 | 0.69152 | BBB+ |
| NPRL4461 | 0.13839 | BBB- |
| NPRL4463 | 0.02179 | BBB- |
| NPRL4464 | 0.66462 | BBB+ |
| NPRL4465 | 0.90779 | BBB+ |
| NPRL4466 | 0.98824 | BBB+ |
| NPRL4468 | 0.51920 | BBB+ |
| NPRL4469 | 0.90396 | BBB+ |
| NPRL4471 | 0.79551 | BBB+ |
| NPRL4472 | 0.98691 | BBB+ |
| NPRL4474 | 0.90147 | BBB+ |
| NPRL4475 | 0.99299 | BBB+ |
| NPRL4476 | 0.89225 | BBB+ |
| NPRL4477 | 0.93668 | BBB+ |
| NPRL4480 | 0.99093 | BBB+ |
| NPRL4483 | 0.27171 | BBB- |
| NPRL4484 | 0.04920 | BBB- |
| NPRL4485 | 0.57253 | BBB+ |
| NPRL4486 | 0.88013 | BBB+ |
| NPRL4487 | 0.42071 | BBB- |
| NPRL4488 | 0.08402 | BBB- |
| NPRL4489 | 0.27565 | BBB- |
| NPRL4490 | 0.47974 | BBB- |
| NPRL4491 | 0.13495 | BBB- |
| NPRL4492 | 0.03369 | BBB- |
| NPRL4493 | 0.70009 | BBB+ |
| NPRL4494 | 0.95178 | BBB+ |
| NPRL4495 | 0.67945 | BBB+ |
| NPRL4496 | 0.98245 | BBB+ |
| NPRL4497 | 0.94992 | BBB+ |
| NPRL4499 | 0.09385 | BBB- |
| NPRL4500 | 0.21140 | BBB- |
| NPRL4501 | 0.94399 | BBB+ |
| NPRL4502 | 0.45936 | BBB- |
| NPRL4503 | 0.96573 | BBB+ |
| NPRL4504 | 0.64268 | BBB+ |
| NPRL4505 | 0.39445 | BBB- |
| NPRL4506 | 0.00372 | BBB- |
| NPRL4507 | 0.08888 | BBB- |
| NPRL4508 | 0.41376 | BBB- |
| NPRL4510 | 0.00562 | BBB- |
| NPRL4513 | 0.88611 | BBB+ |
| NPRL4515 | 0.33408 | BBB- |
| NPRL4518 | 0.35489 | BBB- |
| NPRL4519 | 0.20094 | BBB- |
| NPRL4520 | 0.02036 | BBB- |
| NPRL4521 | 0.00008 | BBB- |
| NPRL4522 | 0.09637 | BBB- |
| NPRL4524 | 0.00084 | BBB- |
| NPRL4526 | 0.22548 | BBB- |
| NPRL4527 | 0.09796 | BBB- |
| NPRL4528 | 0.35555 | BBB- |
| NPRL4529 | 0.49109 | BBB- |
| NPRL4530 | 0.00208 | BBB- |

|          |         |      |
|----------|---------|------|
| NPRL4531 | 0.96089 | BBB+ |
| NPRL4532 | 0.17685 | BBB- |
| NPRL4533 | 0.68535 | BBB+ |
| NPRL4534 | 0.00794 | BBB- |
| NPRL4535 | 0.95385 | BBB+ |
| NPRL4536 | 0.24624 | BBB- |
| NPRL4537 | 0.99426 | BBB+ |
| NPRL4538 | 0.71705 | BBB+ |
| NPRL4539 | 0.79118 | BBB+ |
| NPRL4540 | 0.94677 | BBB+ |
| NPRL4541 | 0.76061 | BBB+ |
| NPRL4542 | 0.98959 | BBB+ |
| NPRL4543 | 0.93072 | BBB+ |
| NPRL4544 | 0.91735 | BBB+ |
| NPRL4545 | 0.60930 | BBB+ |
| NPRL4546 | 0.00490 | BBB- |
| NPRL4547 | 0.79226 | BBB+ |
| NPRL4548 | 0.12983 | BBB- |
| NPRL4549 | 0.56029 | BBB+ |
| NPRL4550 | 0.47152 | BBB- |
| NPRL4551 | 0.34051 | BBB- |
| NPRL4552 | 0.18262 | BBB- |
| NPRL4553 | 0.48072 | BBB- |
| NPRL4554 | 0.23507 | BBB- |
| NPRL4555 | 0.10443 | BBB- |
| NPRL4556 | 0.62502 | BBB+ |
| NPRL4557 | 0.82824 | BBB+ |
| NPRL4558 | 0.80099 | BBB+ |
| NPRL4559 | 0.60758 | BBB+ |
| NPRL4560 | 0.46376 | BBB- |
| NPRL4561 | 0.96999 | BBB+ |
| NPRL4562 | 0.94883 | BBB+ |
| NPRL4564 | 0.69551 | BBB+ |
| NPRL4565 | 0.04749 | BBB- |
| NPRL4566 | 0.05673 | BBB- |
| NPRL4567 | 0.53267 | BBB+ |
| NPRL4568 | 0.93883 | BBB+ |
| NPRL4569 | 0.18627 | BBB- |
| NPRL4572 | 0.64933 | BBB+ |
| NPRL4573 | 0.01646 | BBB- |
| NPRL4574 | 0.00656 | BBB- |
| NPRL4575 | 0.85111 | BBB+ |
| NPRL4577 | 0.12251 | BBB- |
| NPRL4578 | 0.99952 | BBB+ |
| NPRL4581 | 0.99793 | BBB+ |
| NPRL4583 | 0.00335 | BBB- |
| NPRL4584 | 0.99458 | BBB+ |
| NPRL4589 | 0.00210 | BBB- |
| NPRL4590 | 0.01011 | BBB- |
| NPRL4591 | 0.00146 | BBB- |
| NPRL4592 | 0.00246 | BBB- |
| NPRL4593 | 0.59141 | BBB+ |
| NPRL4594 | 0.62706 | BBB+ |
| NPRL4595 | 0.03096 | BBB- |
| NPRL4596 | 0.00593 | BBB- |
| NPRL4597 | 0.01805 | BBB- |
| NPRL4598 | 0.00329 | BBB- |

|          |         |      |
|----------|---------|------|
| NPRL4599 | 0.00127 | BBB- |
| NPRL4600 | 0.00028 | BBB- |
| NPRL4601 | 0.01625 | BBB- |
| NPRL4602 | 0.00252 | BBB- |
| NPRL4603 | 0.00189 | BBB- |
| NPRL4604 | 0.00113 | BBB- |
| NPRL4605 | 0.00204 | BBB- |
| NPRL4607 | 0.85933 | BBB+ |
| NPRL4608 | 0.00170 | BBB- |
| NPRL4609 | 0.00120 | BBB- |
| NPRL4610 | 0.00437 | BBB- |
| NPRL4611 | 0.00037 | BBB- |
| NPRL4612 | 0.00045 | BBB- |
| NPRL4613 | 0.00069 | BBB- |
| NPRL4614 | 0.00211 | BBB- |
| NPRL4615 | 0.00019 | BBB- |
| NPRL4616 | 0.00328 | BBB- |
| NPRL4617 | 0.00138 | BBB- |
| NPRL4618 | 0.00076 | BBB- |
| NPRL4619 | 0.95709 | BBB+ |
| NPRL4620 | 0.98733 | BBB+ |
| NPRL4621 | 0.98052 | BBB+ |
| NPRL4622 | 0.82629 | BBB+ |
| NPRL4623 | 0.00036 | BBB- |
| NPRL4624 | 0.00629 | BBB- |
| NPRL4625 | 0.84189 | BBB+ |
| NPRL4626 | 0.09256 | BBB- |
| NPRL4628 | 0.71449 | BBB+ |
| NPRL4629 | 0.98404 | BBB+ |
| NPRL4630 | 0.25952 | BBB- |
| NPRL4631 | 0.96790 | BBB+ |
| NPRL4632 | 0.84800 | BBB+ |
| NPRL4633 | 0.90594 | BBB+ |
| NPRL4634 | 0.36585 | BBB- |
| NPRL4635 | 0.00455 | BBB- |
| NPRL4636 | 0.92312 | BBB+ |
| NPRL4637 | 0.02636 | BBB- |
| NPRL4638 | 0.13832 | BBB- |
| NPRL4639 | 0.01216 | BBB- |
| NPRL6590 | 0.35690 | BBB- |
| NPRL6591 | 0.23111 | BBB- |
| NPRL6592 | 0.06097 | BBB- |
| NPRL6593 | 0.08896 | BBB- |
| NPRL6594 | 0.26927 | BBB- |
| NPRL6597 | 0.01995 | BBB- |
| NPRL6599 | 0.69608 | BBB+ |
| NPRL6600 | 0.00382 | BBB- |
| NPRL6601 | 0.00058 | BBB- |
| NPRL6602 | 0.00541 | BBB- |
| NPRL6603 | 0.13609 | BBB- |
| NPRL6605 | 0.02791 | BBB- |
| NPRL6606 | 0.96722 | BBB+ |
| NPRL6607 | 0.68004 | BBB+ |
| NPRL6608 | 0.15102 | BBB- |
| NPRL6609 | 0.72630 | BBB+ |
| NPRL6610 | 0.05184 | BBB- |
| NPRL6611 | 0.98397 | BBB+ |

|          |         |      |
|----------|---------|------|
| NPRL6613 | 0.94790 | BBB+ |
| NPRL6614 | 0.97769 | BBB+ |
| NPRL6615 | 0.98631 | BBB+ |
| NPRL6616 | 0.97228 | BBB+ |
| NPRL6617 | 0.99527 | BBB+ |
| NPRL6618 | 0.98694 | BBB+ |
| NPRL6620 | 0.93678 | BBB+ |
| NPRL6622 | 0.99340 | BBB+ |
| NPRL6623 | 0.00349 | BBB- |
| NPRL6624 | 0.27429 | BBB- |
| NPRL6625 | 0.96988 | BBB+ |
| NPRL6626 | 0.87049 | BBB+ |
| NPRL6628 | 0.00859 | BBB- |
| NPRL6629 | 0.48061 | BBB- |
| NPRL6630 | 0.08425 | BBB- |
| NPRL6632 | 0.31201 | BBB- |
| NPRL6633 | 0.77122 | BBB+ |
| NPRL6635 | 0.71418 | BBB+ |
| NPRL6637 | 0.72268 | BBB+ |
| NPRL6638 | 0.98055 | BBB+ |
| NPRL6639 | 0.99979 | BBB+ |
| NPRL6640 | 0.99778 | BBB+ |
| NPRL6641 | 0.72551 | BBB+ |
| NPRL6644 | 0.90114 | BBB+ |
| NPRL6645 | 0.60682 | BBB+ |
| NPRL6646 | 0.05813 | BBB- |
| NPRL6647 | 0.15101 | BBB- |
| NPRL6648 | 0.95063 | BBB+ |
| NPRL6649 | 0.59658 | BBB+ |
| NPRL6650 | 0.17506 | BBB- |
| NPRL6651 | 0.54777 | BBB+ |
| NPRL6652 | 0.77126 | BBB+ |
| NPRL6653 | 0.79700 | BBB+ |
| NPRL6654 | 0.93842 | BBB+ |
| NPRL6655 | 0.96696 | BBB+ |
| NPRL6656 | 0.95426 | BBB+ |
| NPRL6657 | 0.18602 | BBB- |
| NPRL6658 | 0.99687 | BBB+ |
| NPRL6659 | 0.95396 | BBB+ |
| NPRL6660 | 0.21014 | BBB- |
| NPRL6661 | 0.00545 | BBB- |
| NPRL6662 | 0.93108 | BBB+ |
| NPRL6663 | 0.04357 | BBB- |
| NPRL6664 | 0.22898 | BBB- |
| NPRL6665 | 0.87352 | BBB+ |
| NPRL6666 | 0.58048 | BBB+ |
| NPRL6667 | 0.03369 | BBB- |
| NPRL6668 | 0.00304 | BBB- |
| NPRL6669 | 0.07152 | BBB- |
| NPRL6670 | 0.99749 | BBB+ |
| NPRL6671 | 0.97529 | BBB+ |
| NPRL6672 | 0.98699 | BBB+ |
| NPRL6673 | 0.14597 | BBB- |
| NPRL6674 | 0.84582 | BBB+ |
| NPRL6675 | 0.98180 | BBB+ |
| NPRL6676 | 0.90579 | BBB+ |
| NPRL6677 | 0.88371 | BBB+ |

|          |         |      |
|----------|---------|------|
| NPRL6678 | 0.99962 | BBB+ |
| NPRL6679 | 0.99439 | BBB+ |
| NPRL6680 | 0.98487 | BBB+ |
| NPRL6681 | 0.76974 | BBB+ |
| NPRL6682 | 0.69831 | BBB+ |
| NPRL6683 | 0.11165 | BBB- |
| NPRL6684 | 0.85156 | BBB+ |
| NPRL6686 | 0.98363 | BBB+ |
| NPRL6688 | 0.99757 | BBB+ |
| NPRL6689 | 0.93319 | BBB+ |
| NPRL6692 | 0.97802 | BBB+ |
| NPRL6694 | 0.99802 | BBB+ |
| NPRL6699 | 0.54080 | BBB+ |
| NPRL6701 | 0.95323 | BBB+ |
| NPRL6703 | 0.38108 | BBB- |
| NPRL6704 | 0.98975 | BBB+ |
| NPRL6709 | 0.61126 | BBB+ |
| NPRL6710 | 0.99358 | BBB+ |
| NPRL6711 | 0.95776 | BBB+ |
| NPRL6712 | 0.97830 | BBB+ |
| NPRL6713 | 0.04361 | BBB- |
| NPRL6714 | 0.93190 | BBB+ |
| NPRL6715 | 0.97718 | BBB+ |
| NPRL6719 | 0.49683 | BBB- |
| NPRL6720 | 0.32331 | BBB- |
| NPRL6724 | 0.99491 | BBB+ |
| NPRL6728 | 0.93104 | BBB+ |
| NPRL6732 | 0.47680 | BBB- |
| NPRL6733 | 0.45399 | BBB- |
| NPRL6734 | 0.99454 | BBB+ |
| NPRL6737 | 0.62892 | BBB+ |
| NPRL6738 | 0.00116 | BBB- |
| NPRL6739 | 0.43116 | BBB- |
| NPRL6741 | 0.59115 | BBB+ |
| NPRL6742 | 0.93041 | BBB+ |
| NPRL6743 | 0.92543 | BBB+ |
| NPRL6744 | 0.99052 | BBB+ |
| NPRL6745 | 0.00414 | BBB- |
| NPRL6748 | 0.95606 | BBB+ |
| NPRL6749 | 0.79351 | BBB+ |
| NPRL6750 | 0.92481 | BBB+ |
| NPRL6751 | 0.99332 | BBB+ |
| NPRL6752 | 0.94238 | BBB+ |
| NPRL6753 | 0.79734 | BBB+ |
| NPRL6759 | 0.63661 | BBB+ |
| NPRL6760 | 0.99902 | BBB+ |
| NPRL6761 | 0.46869 | BBB- |
| NPRL6763 | 0.95216 | BBB+ |
| NPRL6769 | 0.88020 | BBB+ |
| NPRL6770 | 0.55887 | BBB+ |
| NPRL6771 | 0.89609 | BBB+ |
| NPRL6774 | 0.89863 | BBB+ |
| NPRL6775 | 0.97273 | BBB+ |
| NPRL6776 | 0.77564 | BBB+ |
| NPRL6777 | 0.99933 | BBB+ |
| NPRL6778 | 0.99035 | BBB+ |
| NPRL6779 | 0.68859 | BBB+ |



|          |         |      |
|----------|---------|------|
| NPRL6780 | 0.99955 | BBB+ |
| NPRL6782 | 0.97103 | BBB+ |
| NPRL880  | 0.93135 | BBB+ |
| NPRL881  | 0.99380 | BBB+ |
| NPRL882  | 0.84905 | BBB+ |
| NPRL883  | 0.94611 | BBB+ |
| NPRL884  | 0.33670 | BBB- |
| NPRL885  | 0.38359 | BBB- |
| NPRL886  | 0.91031 | BBB+ |
| NPRL887  | 0.30461 | BBB- |
| NPRL891  | 0.52341 | BBB+ |
| NPRL892  | 0.48024 | BBB- |
| NPRL894  | 0.98749 | BBB+ |
| NPRL895  | 0.20016 | BBB- |
| NPRL898  | 0.99230 | BBB+ |
| NPRL899  | 0.79746 | BBB+ |
| NPRL901  | 0.20136 | BBB- |
| NPRL902  | 0.02254 | BBB- |
| NPRL903  | 0.01456 | BBB- |
| NPRL904  | 0.02048 | BBB- |
| NPRL906  | 0.00153 | BBB- |
| NPRL908  | 0.28221 | BBB- |
| NPRL910  | 0.25753 | BBB- |
| NPRL912  | 0.17984 | BBB- |
| NPRL913  | 0.49927 | BBB- |
| NPRL914  | 0.02011 | BBB- |
| NPRL916  | 0.31739 | BBB- |
| NPRL920  | 0.93298 | BBB+ |
| NPRL921  | 0.80231 | BBB+ |
| NPRL922  | 0.12157 | BBB- |
| NPRL923  | 0.95214 | BBB+ |
| NPRL924  | 0.95577 | BBB+ |
| NPRL925  | 0.95649 | BBB+ |
| NPRL927  | 0.97281 | BBB+ |
| NPRL929  | 0.55780 | BBB+ |
| NPRL930  | 0.85148 | BBB+ |
| NPRL931  | 0.82672 | BBB+ |
| NPRL933  | 0.07027 | BBB- |
| NPRL934  | 0.37147 | BBB- |
| NPRL935  | 0.06169 | BBB- |
| NPRL936  | 0.05551 | BBB- |
| NPRL941  | 0.73517 | BBB+ |
| NPRL942  | 0.01781 | BBB- |
| NPRL943  | 0.73453 | BBB+ |
| NPRL944  | 0.00057 | BBB- |
| NPRL945  | 0.01220 | BBB- |
| NPRL946  | 0.08504 | BBB- |
| NPRL947  | 0.00085 | BBB- |
| NPRL948  | 0.50521 | BBB+ |
| NPRL950  | 0.22470 | BBB- |
| NPRL951  | 0.03467 | BBB- |
| NPRL952  | 0.95860 | BBB+ |
| NPRL953  | 0.17211 | BBB- |
| NPRL955  | 0.00607 | BBB- |
| NPRL956  | 0.01266 | BBB- |
| NPRL957  | 0.01594 | BBB- |
| NPRL958  | 0.75195 | BBB+ |

|         |         |      |
|---------|---------|------|
| NPRL959 | 0.91485 | BBB+ |
| NPRL960 | 0.48397 | BBB- |
| NPRL961 | 0.47950 | BBB- |
| NPRL967 | 0.65590 | BBB+ |
| NPRL968 | 0.54103 | BBB+ |
| NPRL969 | 0.63684 | BBB+ |
| NPRL970 | 0.44128 | BBB- |
| NPRL971 | 0.97612 | BBB+ |
| NPRL972 | 0.93999 | BBB+ |
| NPRL973 | 0.98837 | BBB+ |
| NPRL974 | 0.69664 | BBB+ |
| NPRL977 | 0.39889 | BBB- |
| NPRL978 | 0.02367 | BBB- |
| NPRL979 | 0.65860 | BBB+ |
| NPRL981 | 0.94922 | BBB+ |
| NPRL982 | 0.98652 | BBB+ |
| NPRL983 | 0.63734 | BBB+ |
| NPRL984 | 0.90813 | BBB+ |
| NPRL985 | 0.53502 | BBB+ |
| NPRL986 | 0.47448 | BBB- |
| NPRL987 | 0.20573 | BBB- |
| NPRL988 | 0.56352 | BBB+ |
| NPRL989 | 0.25759 | BBB- |
| NPRL990 | 0.37355 | BBB- |
| NPRL991 | 0.87675 | BBB+ |
| NPRL992 | 0.11134 | BBB- |
| NPRL994 | 0.89732 | BBB+ |
| NPRL995 | 0.96213 | BBB+ |
| NPRL996 | 0.99383 | BBB+ |
| NPRL997 | 0.00398 | BBB- |
